# Supplementary material for: Exploring the Influence Mechanisms of New Quality Productive Forces on the High-Quality Development of the Sports Industry
Source: Research Square preprint supplement (doi:10.21203/rs.3.rs-8254915/v1), 2026-01-20
Supplement: Supplementary file 1 [file 6ae3cfa341797dd5399735e4.xlsx]

## Sheet: 转换结果
行政区划代码	地区	年份	地方财政文化体育与传媒支出（亿元）	文化、体育和娱乐业城镇单位就业人员工资总额（亿元）	文化、体育和娱乐业城镇单位就业人员平均工资（元）	文化、体育和娱乐业城镇单位就业人员（万人）	文化、体育和娱乐业城镇私营单位就业人员平均工资（元）	文化、体育和娱乐业法人单位数（个）	文化办公用品类商品零售价格指数(上年=100)	文化教育广电邮政系统数（处）	艺术表演团体国内演出场次（千场次）	艺术表演团体国内演出观众人次（千人次）	艺术表演团体机构数（个）	艺术表演团体演出场次（万场次）	艺术表演场馆机构数（个）	艺术表演场馆演(映)出场次（千场次）	艺术表演场馆艺术演出场次（千场次）	艺术表演场馆艺术演出观众人次（千人次）	艺术表演场馆观众人次（千人次）
310000	上海	2010	54.95	32.5	68533	4.7	20351	4166	97.7	2390	19.76	10367	89		96	22.85	10.76	6157	7845
310000	上海	2011	68.8	41.69	81409	5.2	24795	4453	94.7	2390	21.36	10424	102	2.18	103	31.8	12.5	8314	10081
310000	上海	2012	72.51	43.66	83701	5.1	26906	4941	94.1	2285	35.74	15145	147	3.97	117	84.89	12.54	7060	10835
310000	上海	2013	89.17	53.3	90056	5.9	34377	6266	94.9	2114	33.91	11750	148	3.41	27	15.33	3.06	1690	2151
310000	上海	2014	86.38	56.18	96303	5.7	36770	6864	98.2	2214	27.8	10171	158	2.8	24	11.6	2.61	1491	2378
310000	上海	2015	108.22	65.98	117099	5.6	42029	7315	99.2	1723	28.73	8629	180	2.89	50	21.68	9.34	2620	5277
310000	上海	2016	113.34	81.05	129644	6	48177	7621	103.2	1367	22.93	10344	205	2.48	47	22.52	7.79	2554	8194
310000	上海	2017	191.32	94.85	145257	6.4	53770	8172	100.1	1103	26.14	9689	199	2.64	49	23.2	7.5	2917	5868
310000	上海	2018	186.52	99.41	165573	5.9	58022	12599	100.4	536	35.4	10970	254	3.57	45	14.5	6.3	3970	4900
310000	上海	2019	179.87	122.61	161284	7.5	61619	12802	97.8		72.7	12250	311	7.29	50	18.2	6.4	3880	5630
310000	上海	2020	161.26	105.9	174370	6	81986	13669	101.4		17.5	5591	315	1.75	61	8.2	4.8	1900	2363
310000	上海	2021	156.42	108.39	180734	6	93524	13791	101.6		28	14109	298	2.8	83	19.9	16.1	7209	8022
530000	云南	2010	35.53	8.8	24834	3.6	15186	2561	99.5	1736	15.4	17407	142		36	9.01	1.16	493	1387
530000	云南	2011	45.34	10.97	32058	3.4	17307	2809	98.4	1736	17	15498	161	2.04	27	8.09	1.4	752	920
530000	云南	2012	62.06	12.08	35997	3.4	11786	3393	97.9	1812	24.59	22270	220	2.66	60	15.44	6.29	3177	4922
530000	云南	2013	61.35	14.43	41914	3.5	24519	5432	100.3	1814	38.23	23253	259	3.87	18	1.32	0.87	401	651
530000	云南	2014	56.21	15.53	46209	3.4	29348	6212	99.5	1810	52.84	26056	284	5.34	17	1	0.8	251	389
530000	云南	2015	61.66	19.49	56135	3.5	33397	7768	99.5	1828	45.19	19400	276	4.57	40	11.83	2.54	266	1399
530000	云南	2016	77.93	22.99	63017	3.6	33236	9216	98.9	1831	44.01	38832	221	4.45	30	10.71	3.03	202	2183
530000	云南	2017	71.3	28.13	76032	3.7	31747	12425	100.3	1831	55.68	28546	316	5.6	45	6.1	3.4	297	2569
530000	云南	2018	72.2	31.63	83405	3.8	34313	14315	101.6	1831	49.4	25700	268	4.98	27	3.6	3.2	750	930
530000	云南	2019	77.9	32.13	85090	3.8	46555	14523	100.1		75.6	35390	304	7.57	50	7.9	5.5	1150	1610
530000	云南	2020	93.08	34.62	91621	3.8	39120	18086	99.1		50.4	15981	270	5.05	34	5.9	4.7	3237	3246
530000	云南	2021	77.57	35.51	95112	3.7	42462	18353	101.7		24.3	14057	312	2.44	50	8.2	7.7	4360	4504
150000	内蒙古	2010	52.96	12.5	37805	3.3	20407	1801	98.1		18.25	16232	123		26	9.02	1.64	611	1985
150000	内蒙古	2011	68.78	14.43	44326	3.3	22681	1837	97.1		19.85	14717	121	2.08	20	5.24	1.02	591	924
150000	内蒙古	2012	87.21	16.37	49701	3.3	28495	1900	98.2		19.71	20400	137	2.19	20	2.82	0.5	235	890
150000	内蒙古	2013	88.05	18.19	52312	3.5	27826	3104	98.9		25.49	13731	144	2.66	18	3.28	0.38	296	874
150000	内蒙古	2014	91.9	19.41	54827	3.5	30669	3357	98.2		24.06	17793	177	2.56	19	15.35	0.54	298	826
150000	内蒙古	2015	95.81	21.17	60979	3.5	31068	3722	100.7		38.75	11235	175	3.91	25	15.33	2.89	582	1072
150000	内蒙古	2016	89.25	23.04	65311	3.5	31807	4575	101.1		24.39	12411	186	2.45	31	23.76	3.76	639	1438
150000	内蒙古	2017	116.79	25.86	69346	3.7	30549	5531	101		28.57	16019	206	2.88	44	25.8	2.5	295	1538
150000	内蒙古	2018	109.27	23.3	71777	3.3	35832	7343	101		30.9	16110	226	3.13	54	33.7	2.8	620	2420
150000	内蒙古	2019	119.34	25.3	78895	3.2	34813	8314	100.3		33.3	22380	264	3.36	45	18.3	3	710	1710
150000	内蒙古	2020	123.64	25.92	81138	3.2	34835	8950	99.9		19.3	10433	204	1.94	32	9	3.5	216	616
150000	内蒙古	2021	107.33	26.21	84989	3.1	39423	10279	100		18.4	6768	221	1.88	36	7.3	1.3	509	942
110000	北京	2010	79.36	118	76415	15.3	27188	11762	92.6	2483	6.84	4296	18		73	54.34	16.91	8142	10350
110000	北京	2011	87.01	152.06	92617	16.5	31222	12112	93	2400	12.12	7232	118	1.45	68	54.9	16.62	7821	9315
110000	北京	2012	141.37	179.15	105785	17.1	35961	12754	95.7	2053	20.84	10081	324	2.34	96	53.98	17.1	8403	10670
110000	北京	2013	154.71	203.67	112707	18.1	52990	26787	95.6	2347	21.7	9830	292	2.24	17	12.02	2.92	1682	2100
110000	北京	2014	163.9	212.9	121094	17.4	49915	27309	93.6	2347	22.3	10261	344	2.48	17	11.32	2.54	1710	2163
110000	北京	2015	188.5	239.32	130134	18.3	49690	30574	98.3	2347	27.04	10852	395	2.8	54	41.95	15.41	1769	8074
110000	北京	2016	198.35	259.52	139087	18.7	64250	29447	95.1	2347	26.15	8770	485	2.69	69	67.46	16.54	1889	11734
110000	北京	2017	208.96	287.16	150810	19	69079	29908	96.7	2347	60.22	11007	451	6.08	66	43.7	15.2	1572	10608
110000	北京	2018	245.43	331.74	173632	19	70601	53882	98.5	2347	24.8	9150	414	2.55	61	77.2	15.8	6010	10070
110000	北京	2019	279.32	384.18	205405	18.6	87799	49183	98.3		23.6	8030	370	2.43	52	206.8	9.4	3170	11400
110000	北京	2020	225.11	393.14	221193	17.9	89806	82571	99.8		12.2	26421	393	1.26	55	135.4	112.6	2517	3192
110000	北京	2021	220.06	423.28	224007	19.2	93905	100015	104.1		22.9	11855	495	2.29	64	30.2	22.7	2287	3203
220000	吉林	2010	32.93	10	26684	3.7	16293	1572	100.3	231	8.06	8859	68		32	13.93	2.15	635	1158
220000	吉林	2011	44.25	11.41	30467	3.7	17580	1599	101.1	243	8.33	8936	67	0.9	29	15.83	1.74	593	1063
220000	吉林	2012	47.48	12.41	34017	3.6	20126	1844	98.7	243	5.33	5913	41	0.67	37	17.71	3.03	783	1424
220000	吉林	2013	56.55	13.61	37367	3.6	21976	2736	98.9	985	6.36	4242	54	0.64	26	18.56	1.16	436	1785
220000	吉林	2014	61.16	14.17	40313	3.5	22813	3142	98.9	985	5.67	5027	56	0.59	28	20.38	3.4	441	1500
220000	吉林	2015	73.01	18.64	50810	3.6	24016	3186	99.6	960	5.72	3719	49	0.6	49	25.31	5.68	456	2042
220000	吉林	2016	72.03	19.86	55335	3.5	26079	3378	98.5	275	5.53	3583	54	0.59	50	30.2	10.86	863	2602
220000	吉林	2017	70.69	21.14	57349	3.7	28393	3516	101.5	275	6.46	4263	68	0.7	56	57	11.1	853	2547
220000	吉林	2018	70.24	23.43	63352	3.7	30818	4205	101.3	275	12.2	3670	82	1.23	58	21.1	3.8	400	1480
220000	吉林	2019	71.75	21.51	65789	3.3	33123	3922	99.6		6.5	3480	95	0.65	70	21.1	4.5	800	2070
220000	吉林	2020	71.92	19.88	67641	3	30995	4278	100.8		4.7	3685	104	0.48	85	10.7	2.6	256	527
220000	吉林	2021	61.08	21.19	72104	3	40261	5086	101.5		6.1	3868	114	0.62	104	21.5	5.5	363	745
510000	四川	2010	59.37	14.2	32101	4.4	16293	4394	98.5	3270	50.56	33039	348		94	12.37	8.25	2460	3787
510000	四川	2011	87.35	16.2	36944	4.4	23169	4576	96.5	3389	56.45	27876	370	6.27	78	13.34	8.46	1662	2177
510000	四川	2012	120.7	19.49	43665	4.5	25821	6505	96.8	3270	62.43	39631	469	6.67	130	31.63	17.69	2717	10631
510000	四川	2013	142.4	27.88	47138	5.9	31131	12806	98.2	3200	75.86	125414	510	7.65	42	3.73	1.03	512	826
510000	四川	2014	135.65	32.37	51728	6.3	33485	15232	97.4	3160	63.71	18873	492	6.42	41	1.89	1.25	594	935
510000	四川	2015	139.41	35.56	58860	6.1	34103	15893	98.8	3148	102.45	20118	543	10.26	99	10.72	8.97	497	2015
510000	四川	2016	145.2	38.32	64885	6.1	36289	17190	96.2	3200	83.89	23037	621	8.42	88	9.04	8.26	627	2284
510000	四川	2017	142.46	44.71	71769	6.3	38730	17780	94.7	3100	77.02	25411	697	7.77	101	12	8.4	815	2580
510000	四川	2018	154.91	44.36	80152	5.5	40273	26469	99.4	3100	108.7	23400	829	10.93	110	12.4	7.5	1500	3030
510000	四川	2019	196.48	47	86139	5.5	48821	25914	99.2		61.1	26420	732	6.14	101	13.8	8.9	2140	3210
510000	四川	2020	229.27	52.8	84292	6.3	44103	26918	98.9		36.4	14313	725	3.65	125	6.3	4.5	869	1137
510000	四川	2021	210.47	62.16	92287	6.8	49186	26974	103.3		45	148905	663	4.5	159	38.8	36.1	3128	3727
120000	天津	2010	24.28	9.5	54182	1.8	21559	1428	90.8		3.79	3183	36		37	20.4	8.32	1677	2344
120000	天津	2011	29.76	9.38	59627	1.6	24716	1608	90.5		4.08	2866	53	0.43	57	17.09	3.76	867	1453
120000	天津	2012	35.85	12.4	64602	1.9	29614	1863	94.6		4.69	2315	48	0.52	35	16.06	2.59	888	1483
120000	天津	2013	44.53	15.27	67310	2.3	36413	2544	97.7		6.86	2849	58	0.69	26	13.71	1.51	629	1390
120000	天津	2014	47.87	16.28	77689	2.1	40413	3179	96.4		10.88	4184	66	1.1	28	15.99	1.9	821	1532
120000	天津	2015	51.73	19.74	87264	2.2	45666	4821	97.2		17.23	6726	86	1.76	50	24.25	4.54	917	2898
120000	天津	2016	57.16	23.94	111368	2.1	51602	7533	100.3		7.75	3975	84	0.79	51	25.75	5.59	1101	2648
120000	天津	2017	57.94	30	116655	2.5	55824	10716	99.5	521	9.02	4651	103	0.91	57	58	3.7	1058	4460
120000	天津	2018	52.92	30.07	131631	2.3	58991	7395	98.9	521	11	3640	121	1.11	68	64.3	5.5	2200	4000
120000	天津	2019	46.41	36.43	165288	2.1	58002	7684	100.8		9.2	3960	151	0.92	74	36.3	7.9	1190	3700
120000	天津	2020	34.01	24.84	143036	1.7	57636	9625	100.4		5	7787	113	0.5	85	29.5	20.1	801	1413
120000	天津	2021	36.97	24.6	134871	1.7	66054	10486	102.4		10	2335	112	1	114	24	14.3	1747	3005
640000	宁夏	2010	16.09	2.6	34118	0.8	13568	329	94.8	436	4.67	5975	45		15	1.61	0.78	134	340
640000	宁夏	2011	13.94	3.04	42154	0.7	23368	333	98	457	5.82	5265	37	0.62	6	0.09	0.02	6	12
640000	宁夏	2012	14.44	3.42	47805	0.7	18183	368	96.4	457	2.95	3131	16	0.34	7	0.35	0.04	38	145
640000	宁夏	2013	16.6	3.94	48919	0.8	24202	1087	98.7	439	8.6	5958	33	0.93	3	0.5	0.02	11	109
640000	宁夏	2014	16.02	4.74	54120	0.9	24796	1149	96.1	392	14.1	4143	31	1.41	3	0.58	0.02	11	72
640000	宁夏	2015	20.97	6.62	62941	1.1	28980	1268	98.9	390	6.12	4926	40	0.62	3	0.49	0	0	11
640000	宁夏	2016	25.23	6.7	66563	1	31258	1520	99.5	200	5.25	3599	34	0.53	6	0.9	0.4		118
640000	宁夏	2017	22.82	6.87	67913	1	32444	1606	101.3	200	17.42	3885	45	1.78	3	0.9	0.2	185	237
640000	宁夏	2018	23.33	7.08	77093	0.9	35359	1647	100.4	298	7.6	2800	75	0.76	6	1.1	0.5	1020	1060
640000	宁夏	2019	25.85	6.89	82955	0.8	37024	2085	99.3		4.9	3000	30	0.5	3	0.3	0.2	100	140
640000	宁夏	2020	29.43	9.12	90726	1	37573	2472	101.3		2.9	1351	30	0.29	3	1.9	1.9	90	110
640000	宁夏	2021	24.39	8.76	92203	0.9	43668	2919	102.9		3.7	1726	43	0.38	6	0.5	0.5	77	88
340000	安徽	2010	51.68	9.6	28435	3.4	17709	2280	99.1	3576	389.39	107864	1255		60	15.55	1.93	710	2516
340000	安徽	2011	62.35	11.27	34353	3.3	18423	2653	98.4	3580	145.25	118211	1294	14.89	67	13.21	4.03	761	2091
340000	安徽	2012	71.43	13.91	39138	3.6	24269	3204	99.4	3560	237.33	69320	1015	25.1	72	97.75	5.52	2322	42945
340000	安徽	2013	79.5	14.42	42787	3.4	27302	8852	99.6	3582	316.55	85781	991	31.73	48	17.1	3.04	1053	2595
340000	安徽	2014	82.25	14.81	44211	3.4	24599	11029	99	3657	288.96	140957	988	28.96	48	9.95	2.28	1018	3171
340000	安徽	2015	88.19	17.03	52272	3.2	30021	13372	99.1	3457	390.38	106862	1617	39.1	76	11.2	5.86	799	3356
340000	安徽	2016	84.23	18.95	55773	3.4	31223	14519	98.8	3457	458.27	329685	1879	45.87	88	25.57	5.71	874	5504
340000	安徽	2017	80.94	19.88	62014	3.2	37861	18125	102.3	3457	581.67	253306	2639	58.23	91	16.1	5.9	1055	4895
340000	安徽	2018	79.77	23.1	68973	3.3	36344	21353	99.1	1937	504.7	199600	2859	50.52	107	81.6	4.8	1550	6790
340000	安徽	2019	87.98	26.87	72342	3.7	43321	21037	98.6		346.4	133980	2628	34.71	107	17.4	6.1	2050	4020
340000	安徽	2020	97.06	27.5	79224	3.5	44752	23232	99		301.2	95551	2334	30.16	100	9.3	3	792	1359
340000	安徽	2021	86.1	30.04	84665	3.5	48097	25514	100.3		407.4	61191	2870	40.77	106	6.9	3.7	1138	1694
370000	山东	2010	74.03	27.4	41008	6.7	20732	4992	98.5	916	19.98	25382	119		91	21.3	1.5	1103	5291
370000	山东	2011	91.57	28.4	43492	6.6	23885	5263	99.1	920	31.12	25189	252	3.21	93	26.5	3.13	1220	3070
370000	山东	2012	114.27	33.22	48702	6.9	27681	6234	98.6	905	35.53	24515	303	3.81	103	18.33	2.19	1833	3811
370000	山东	2013	127.53	40.85	56870	7.2	32012	11541	98.9	890	53.12	36022	414	5.41	93	11.37	1.99	1620	2990
370000	山东	2014	127.75	44.84	62056	7.1	36948	13593	99.3	690	164.06	37466	481	16.5	93	9.53	2.14	1586	3135
370000	山东	2015	137.26	49.18	71453	7	42204	15590	99.9	690	132.57	38716	623	13.32	101	16.87	3.81	1586	3960
370000	山东	2016	137.47	54.2	77462	7	45784	21732	98.8	690	83.34	40935	567	8.43	100	12.22	4	1832	3930
370000	山东	2017	141.9	57.99	81074	7.1	48460	27862	100.6	690	108.17	48382	772	10.89	100	13.2	4.4	2193	4168
370000	山东	2018	153.52	60.03	84445	7.1	52010	37583	101.2	500	222.6	52560	828	22.33	106	13.9	3.8	1930	5850
370000	山东	2019	189.5	60.17	87556	6.9	52679	43350	100.3		136.3	70560	1306	13.73	145	32.8	22.1	3060	5380
370000	山东	2020	170.11	72.81	96490	7.5	53455	50216	100.2		139.6	150847	1566	14	154	18.2	10.7	1880	5622
370000	山东	2021	180.36	80.31	100855	8	50325	55878	100.6		179.2	62345	1572	17.93	198	115.8	92.1	4044	5416
140000	山西	2010	31.24	11.5	24927	4.6	15445	2579	97.7	535	52.29	57550	342		103	62.01	4.85	3196	8392
140000	山西	2011	48.17	13.55	29377	4.6	15713	2727	96.5	445	51.99	42830	308	5.3	97	63.77	2.07	536	2814
140000	山西	2012	60.2	14.8	33307	4.5	18629	3398	98	445	48.38	52588	301	5.07	129	82.01	4.18	1858	5701
140000	山西	2013	66.69	16.92	36348	4.7	19786	5601	98	363	38.88	37008	226	3.93	100	98.06	8.54	1604	5166
140000	山西	2014	63.95	19.45	40133	4.9	21787	6073	98.4	309	53.59	35921	351	5.54	99	72.17	1.87	948	3271
140000	山西	2015	73.08	21.67	47387	4.6	24893	7360	99.2	329	60.7	39515	456	6.11	137	108.77	5.93	1420	4408
140000	山西	2016	72.64	22.55	49041	4.6	23396	10128	98.9	302	92.13	46422	546	9.25	127	81.68	7.06	1438	3818
140000	山西	2017	71.92	24.11	53992	4.4	26299	12183	100.1	340	101.57	56927	665	10.26	121	75.1	4.2	1998	5493
140000	山西	2018	92.85	26.66	57050	4.7	27389	13635	99.9	335	95.1	48480	795	9.57	125	112.5	4.8	1930	4430
140000	山西	2019	112.24	25.9	58952	4.4	23244	15417	100		97	52100	779	9.76	137	76.1	5.4	1680	3660
140000	山西	2020	112.31	27.44	60412	4.6	31191	17997	101.1		61.4	35891	827	6.16	167	33.9	5.7	822	2217
140000	山西	2021	97.04	28.57	64032	4.4	33761	20439	101.1		212.7	39750	814	21.34	172	95.5	31.2	1736	3357
440000	广东	2010	166.16	44.5	47213	9.4	23741	7010	98.4	3293	41.52	56089	397		124	33.68	8.24	5098	8939
440000	广东	2011	170.56	48.63	53259	9.2	24826	7762	99		52.71	44195	401	5.45	107	34.36	14.59	5305	11944
440000	广东	2012	137.64	52.29	56081	9.5	28311	9290	99.4		39.14	90822	337	5	93	37.98	8.28	4060	11823
440000	广东	2013	141.68	71.35	65268	10.9	33023	14695	99.3		42.04	46005	405	4.24	45	12.84	2.19	1502	3154
440000	广东	2014	168.16	80.27	69745	11.5	40322	16988	99.2		46.37	27417	325	4.7	44	15.23	2.16	1438	2721
440000	广东	2015	194.58	93.92	80069	11.6	49836	18220	98.5		40.91	21420	391	4.13	66	22.94	4.62	1515	4626
440000	广东	2016	229.71	111.04	93300	11.8	47878	20781	97.8		38.39	24273	357	3.88	75	27.55	6.74	2483	5632
440000	广东	2017	285.87	120.48	104446	11.5	54540	25782	98.2		41.18	23501	390	4.15	83	20.8	5.4	2103	12464
440000	广东	2018	321.84	124.15	116940	10.5	61534	61695	98.3		45.9	25220	436	4.63	86	29.1	5.6	4550	17170
440000	广东	2019	350.33	174.22	130164	13.4	65462	63415	97.8		46.2	26010	397	4.65	84	11.4	3.7	3140	7610
440000	广东	2020	417.22	165.79	133576	12.5	54836	66685	99.2		33.8	16899	475	3.39	118	8.9	5.7	1765	2278
440000	广东	2021	395.59	173.53	132893	13.1	64159	68046	101.3		89.1	45385	447	8.93	136	17.9	9.6	4706	6609
450000	广西	2010	32.77	10.2	32141	3.2	14538	3005	98.9	1520	14.93	15076	141		24	18.68	1.65	703	1360
450000	广西	2011	37.48	10.58	31609	3.3	16158	3180	98.9	1924	11.86	12073	149	1.32	26	18.44	1.02	509	1306
450000	广西	2012	45.52	11.79	36314	3.3	20601	3489	99	1924	11.07	7579	68	1.2	20	23.51	2.53	662	1592
450000	广西	2013	49.85	13.16	40389	3.3	20050	6665	98.6	1920	14.62	8818	59	1.54	19	18.18	1.16	582	1228
450000	广西	2014	68.52	15.63	46735	3.4	23086	7302	99.8	1728	8.97	6639	67	0.92	17	20.55	1.4	623	1145
450000	广西	2015	79	18.83	56579	3.4	27013	7962	99.6	1670	13.17	18240	92	1.37	29	22.38	1.52	314	2169
450000	广西	2016	71.08	20.16	62365	3.2	29305	8818	99.8	1670	11.47	8484	100	1.2	34	23.05	2.18	94	1232
450000	广西	2017	64.36	22.95	70016	3.3	31994	9168	99.9	1670	14.33	9732	108	1.44	38	22.9	1.3	138	976
450000	广西	2018	63.59	24.3	77963	3.2	32223	11599	100.2	1180	17	11180	112	1.71	57	27.3	3.2	150	1900
450000	广西	2019	76.33	25.02	78402	3.2	35667	12679	99.8		18.4	10390	95	1.85	63	25.9	6.1	630	1780
450000	广西	2020	109.49	22.41	77581	2.9	37337	14253	99.8		9.4	5056	78	0.94	48	6.7	4.1	1734	1847
450000	广西	2021	88.51	27.71	85338	3.3	40797	15897	101.4		8.8	2590	72	0.89	34	3.3	2.7	2401	2500
650000	新疆	2010	33.92	8.6	32609	2.7	17101	1141	99.2		15.15	10524	132		15	20.44	0.17	90	1070
650000	新疆	2011	47.7	12.19	38062	3.2	20385	1161	98.7		14.27	10002	133	1.6	13	32.15	0.2	113	1036
650000	新疆	2012	68.23	13.18	45049	2.9	18168	1224	98.5	170	18.07	9934	137	1.89	16	42.94	0.76	327	1456
650000	新疆	2013	74.63	15	50951	3	22839	2925	99.5	170	14.02	8657	123	1.45	15	34.78	0.84	266	983
650000	新疆	2014	74.32	15.56	52299	3	34479	3628	100.1	110	16.41	9231	122	1.68	15	32.38	0.77	152	669
650000	新疆	2015	78.96	19.3	64906	3	35444	3900	98	110	17.21	12069	132	1.76	16	40.17	0.49	201	3455
650000	新疆	2016	77.61	21.18	71168	3	39310	4977	99.2	110	16.35	11902	131	1.69	17	36.52	0.6	185	714
650000	新疆	2017	80.4	23.8	80821	2.9	42498	7664	98.3	1544	16.09	10937	127	1.67	24	60.1	1.7	82	1065
650000	新疆	2018	73.39	21.43	79840	2.7	41101	5684	98.6	1544	18.2	10620	134	1.85	26	60.3	1.2	660	1200
650000	新疆	2019	92.14	21.66	84009	2.6	41040	5593	99.2		36.6	12650	132	3.73	23	42.4	11.4	530	900
650000	新疆	2020	82.5	24.53	89779	2.7	43639	6584	103.1		20.6	3323	124	2.12	24	3.7	0.6	443	508
650000	新疆	2021	87.44	30.68	98245	3.2	52766	6691	102.6		15.6	5374	113	1.63	22	7.7	1.4	69	584
320000	江苏	2010	88.67	27.3	48360	5.7	23497	6312	96.5	1645	74.86	39406	408		201	221.72	7.76	3185	19214
320000	江苏	2011	116.86	31.39	52576	6	24560	7352	96.5	1683	83.71	31078	370	8.46	110	278.55	16.88	2421	16080
320000	江苏	2012	150.9	35.5	58582	6.1	29752	9065	97.2	2470	100.78	37689	434	10.31	217	363.77	10.83	4255	19991
320000	江苏	2013	173.54	48.53	63059	7.7	32744	15410	99.5	2414	77.34	26631	291	7.9	110	368.23	14.88	2725	21601
320000	江苏	2014	190.86	55.81	71787	7.8	36443	18371	100.5	2220	61.17	26059	287	6.28	111	325.14	17.04	2890	16965
320000	江苏	2015	196.06	60.44	77468	7.8	39839	20741	100.7	2180	85.14	28091	369	8.56	207	378.74	10.51	3035	20244
320000	江苏	2016	193.28	66.29	84242	7.9	43600	28933	97.9	2070	87.17	40511	444	8.81	223	412.41	25.48	3638	19742
320000	江苏	2017	194.37	73.94	91968	8	46356	37550	99.8	2376	103.55	37240	628	10.42	254	424.4	24.8	3949	17359
320000	江苏	2018	197.22	85.76	107119	7.9	51389	44141	101.4	1538	100	35460	662	10.04	249	270.4	23.5	4010	10690
320000	江苏	2019	264.53	100.18	108370	9.2	54362	44902	101.8		120.7	46830	626	12.11	244	199.3	11.4	3140	8920
320000	江苏	2020	311.68	105.32	117081	8.9	59413	47539	103.7		74	31149	620	7.41	274	65.1	12.2	3018	4367
320000	江苏	2021	271.01	111.21	123618	8.9	62836	55633	102.6		98.8	30691	704	9.89	329	135.8	23.8	5658	9949
360000	江西	2010	28.38	9.7	30555	3.2	17274	2303	97.9	21	18.56	15849	99		57	11.1	5.12	1153	1772
360000	江西	2011	39.66	8.51	32519	2.9	19797	2357	99.7	21	18.83	20019	99	1.96	55	11.41	5.8	642	1330
360000	江西	2012	44.77	16.73	43512	3.9	21529	2899	99.4	21	27.6	26576	187	2.97	73	15.19	3.23	1347	10951
360000	江西	2013	52.62	14.57	44087	3.3	26600	5098	98	21	50.58	23792	229	5.09	51	7.62	2.7	954	2039
360000	江西	2014	60.03	13.53	44941	3	25431	6084	99.2	21	33.92	22389	219	3.42	49	6.75	2.84	1233	1976
360000	江西	2015	68.9	20.09	53649	3.8	28038	6586	99.8	21	29.89	15438	236	3.02	57	6.72	3.14	1129	1738
360000	江西	2016	70.49	25.58	61272	4.2	32818	7479	100.6	21	46.99	16250	304	4.75	57	5.91	2.77	624	1254
360000	江西	2017	74.65	22.01	64370	3.4	36511	9369	103.1	21	66.33	31341	425	6.68	61	19.4	3.5	696	2328
360000	江西	2018	79.1	21.77	72367	2.9	41298	10752	100.6	2658	76.8	23260	379	7.7	57	26.9	2.6	1030	3150
360000	江西	2019	87.6	24.14	80511	3	44446	11180	100.2		43.2	31250	337	4.36	89	75.8	11.7	1570	3860
360000	江西	2020	120.35	26.41	80903	3.3	42422	14443	100.2		47.6	19047	380	4.79	77	19.8	14.1	963	1483
360000	江西	2021	117.32	27.54	85383	3.2	45092	17659	99.1		68.2	14063	395	6.86	82	108.8	90.9	4479	5746
130000	河北	2010	37.09	13.2	26208	5	15855	2272	97.3	1436	46.98	49482	284		113	15.59	4.34	2080	3740
130000	河北	2011	50.45	15.46	30311	5.1	18438	2322	97.4	874	43.9	33794	312	5.21	113	17.97	4.11	967	3043
130000	河北	2012	59.29	17.55	33453	5.2	21939	2675	98.4	2107	56.9	57335	448	6.95	138	32.29	6.79	2265	4739
130000	河北	2013	72.71	19.23	36423	5.3	23901	7388	99.5	2107	69.68	51828	500	7.53	77	17.91	1.43	604	2042
130000	河北	2014	82.66	20.9	39789	5.3	26507	7901	100	2107	76.31	53697	458	7.75	77	18.16	1.27	470	1444
130000	河北	2015	88.34	25.21	45994	5.5	30657	8614	100.1	1455	81.22	45590	596	8.26	108	28.64	3.24	533	2569
130000	河北	2016	87.54	28.26	51507	5.5	33065	10845	100.2	1965	90.09	54186	712	9.19	112	61.66	9.27	533	2238
130000	河北	2017	103.19	29.4	58934	5	34564	16678	99.2	2460	94.87	55014	735	9.58	96	61	4.4	657	1995
130000	河北	2018	115.17	34.17	66123	5.1	36965	23852	100.1	2434	98.4	33160	450	9.92	81	39.9	1.6	640	1590
130000	河北	2019	158	37.29	71743	5.2	41382	24147	100		91.9	68540	749	9.27	112	75.6	3.7	1210	2690
130000	河北	2020	163.73	40.26	77217	5.2	43875	27088	98.1		79.8	33415	770	8.02	100	28.1	9.1	386	898
130000	河北	2021	127.08	41.46	78373	5.3	43539	29902	100.7		42.4	19234	874	4.26	128	42.7	3.2	961	1903
410000	河南	2010	54.99	19.8	28511	7	14560	3750	98.7	2413	76.02	84058	371		150	24.16	3.27	1423	3613
410000	河南	2011	57.54	22.03	31249	7.1	16542	3856	98.5	2310	128.57	74206	468	14.09	144	13.08	3.08	1589	3223
410000	河南	2012	69.63	25.66	35925	7.1	19982	4574	99.3	2310	83.9	77508	364	9.83	145	19.93	2.91	1343	6110
410000	河南	2013	80.78	29.44	36555	8.5	22177	13048	99.2	2290	260.6	91224	429	26.1	139	9.59	1.64	1065	2290
410000	河南	2014	91.16	31.4	42426	7.5	25405	15757	100	2290	206.1	111102	598	20.64	140	10.57	1.66	978	2206
410000	河南	2015	105.38	37.02	47591	7.8	26439	17609	99	3167	355.95	194157	824	35.62	150	19.26	2.51	1144	2728
410000	河南	2016	97.33	39.9	51908	7.8	30192	15552	100.7	6102	462.47	119943	1006	46.27	150	8.69	3.34	1115	3044
410000	河南	2017	97.52	44.67	58161	7.7	30962	18163	103.2	5917	646.61	150480	1671	64.68	157	6.3	3.8	989	3198
410000	河南	2018	103.04	47.85	67815	7.1	34377	34229	100.5	6102	392.1	153490	2017	39.23	155	15.6	3.8	1630	3090
410000	河南	2019	127.87	48.65	73108	6.8	39115	33538	103.2		389.5	201740	2221	38.98	191	20.7	6.6	3480	7210
410000	河南	2020	140.93	55.85	74843	7.5	41995	36426	100.9		305.7	123515	2391	30.62	198	10.7	8.4	1533	2892
410000	河南	2021	122.01	54.31	75458	7.3	42746	42011	102.1		229	117480	2249	22.9	222	17.3	15.2	3577	4665
330000	浙江	2010	77.15	34.4	56313	6.2	20332	5274	98.1	2242	102.25	105733	471		242	68.85	26.38	5814	17434
330000	浙江	2011	85.09	40.45	61695	6.6	25900	6044	97.9	2614	128.49	50915	498	13.61	223	101.29	17.59	5146	13087
330000	浙江	2012	94.18	44.88	66915	6.7	29909	7218	97.3	2607	132.07	86244	609	13.63	271	75.34	14.79	6097	13510
330000	浙江	2013	106	52.6	73090	7.2	32170	14697	98.2	2208	145.31	92721	733	14.55	61	40.73	4.23	2610	8944
330000	浙江	2014	115.36	56.33	78311	7.2	31936	17680	99.6	2551	182.42	146696	891	18.27	62	46.09	5.2	2857	7443
330000	浙江	2015	165.38	64.83	87177	7.4	35165	21070	100	2481	217.7	153367	1024	21.82	308	93.28	20.92	3284	13008
330000	浙江	2016	158.72	66.56	97257	6.8	39623	25203	98.4	2201	288.44	180405	1245	28.87	326	98.16	28.09	2902	22371
330000	浙江	2017	159.66	73.79	109932	6.7	44535	30861	99.2	2201	370.24	209732	1410	37.05	365	116.9	42	2698	15253
330000	浙江	2018	174.59	81.48	114343	7.1	49722	36470	100.5	2201	378.3	207880	1573	37.87	336	94.9	24.6	7320	13260
330000	浙江	2019	203.26	89.77	116297	8	49924	42742	100.3		375	182610	1550	37.54	358	122.1	23.8	7640	13200
330000	浙江	2020	229.62	96.62	125984	7.9	51676	52742	99.8		203.8	69664	1236	20.38	313	59	24.5	4056	5861
330000	浙江	2021	249.35	101.61	138718	7.4	59943	57839	101		265.1	59473	1357	26.51	273	98	55.6	12327	14499
460000	海南	2010	11.61	3.4	29492	1.2	16162	662	98.5	367	8.41	6825	67		10	3.87	0.38	247	1104
460000	海南	2011	16.6	4.15	34700	1.2	20044	712	100.6	362	8	6075	86	0.86	14	6.23	4.73	414	637
460000	海南	2012	19.85	3.94	35410	1.1	19775	832	100	371	5.9	4130	61	0.84	13	3.67	0.88	289	693
460000	海南	2013	21.9	5.46	43622	1.3	23804	1343	99.2	373	9.46	9723	67	0.95	7	0.73	0.26	263	511
460000	海南	2014	23.51	5.9	47717	1.2	26738	1605	103.7	373	9.66	16730	71	0.97	7	0.84	0.4	131	235
460000	海南	2015	25.48	6.49	56348	1.2	28559	1798	101.1	426	7.64	7012	66	0.77	11	2.46	0.47	261	1518
460000	海南	2016	26.9	7.9	63699	1.3	34852	2027	99.6	426	8.85	8112	74	0.89	16	4.37	0.97	184	3847
460000	海南	2017	29.86	8.64	67235	1.3	35683	2426	99.5	388	10.73	9407	77	1.08	17	3.7	2.3	128	6244
460000	海南	2018	47.37	9.96	75795	1.4	47000	3140	99.9	326	9.3	7160	82	0.94	15	8.3	2.1	1490	6600
460000	海南	2019	56.34	10.49	79343	1.3	57187	3807	99.3		11.1	10960	111	1.11	30	5.6	3.8	5640	6010
460000	海南	2020	53.22	11.65	80492	1.6	48242	4337	99.9		11.5	8842	102	1.15	20	17.4	16.9	2303	2318
460000	海南	2021	37.74	13.59	86885	1.6	92466	5903	101.6		9.1	2377	127	0.91	44	15.7	13.7	3199	3525
420000	湖北	2010	36.67	16.4	32390	5.1	16711	4486	97.4	664	35.68	38923	204		68	27.83	11.29	1809	7722
420000	湖北	2011	47.09	18.81	35310	5.4	19628	4806	98.8	664	39.19	30178	172	4.14	65	40.72	2.87	1266	3029
420000	湖北	2012	62.47	23.58	37397	6.3	22016	5913	98.9	664	34.14	30144	226	3.59	66	34.41	26.09	1794	3351
420000	湖北	2013	72.44	25.2	45201	5.6	23887	10128	99.1	600	36.89	28801	307	3.73	53	24.99	2.08	1403	2562
420000	湖北	2014	76.65	29.49	51861	5.7	24795	11787	98.8	600	38.23	33444	273	3.9	52	27.14	2.35	1460	2618
420000	湖北	2015	84.03	37.34	58510	6.3	27778	12279	99.9	600	37.67	29017	282	3.85	58	34.86	3.25	1544	2879
420000	湖北	2016	96.61	39.22	61018	6.5	29014	13358	99.7	480	37.79	30518	308	3.85	58	54.17	2.39	1422	3289
420000	湖北	2017	95.26	49.67	69129	7.2	31556	16360	98.9	328	64.3	41507	473	6.46	65	53.5	3.1	1829	3219
420000	湖北	2018	113.15	53.34	79295	6.7	34307	23539	98.9	263	366	44260	489	36.69	61	67.4	2.8	1550	3080
420000	湖北	2019	148.53	49.74	83183	5.9	38545	24354	98.2		50.5	60490	388	5.11	67	52.1	3.4	1850	2980
420000	湖北	2020	146.52	53.91	88357	6.1	46427	26551	101.4		82.2	60672	441	8.24	73	17.2	1.7	715	1082
420000	湖北	2021	131.37	60.28	96538	6.3	52808	29435	100.7		37.8	27398	415	3.8	70	18.4	15.5	1653	2494
430000	湖南	2010	39.66	15.2	32908	4.6	17243	4199	99.9	5010	31.85	21736	201		63	28.23	3.68	1536	3189
430000	湖南	2011	44.87	19.98	38532	5.2	19564	4346	100.8	5003	20.33	14429	114	2.07	66	38.2	3.36	1089	4507
430000	湖南	2012	54.5	21.48	43448	5	20565	4998	99.6	4682	26.97	15838	157	2.97	83	26.55	5.02	1847	4416
430000	湖南	2013	68.95	24.72	48902	5.1	24419	14474	99.8	4580	35.25	17749	227	3.55	58	27.61	2.74	1288	3293
430000	湖南	2014	80.01	28.04	53924	5.3	24903	14328	100.4	4588	49.05	17117	271	4.97	57	25.98	1.98	1290	3192
430000	湖南	2015	111.74	34.33	62665	5.5	27725	14899	99.8	4742	65.47	19114	273	6.61	71	31.29	4.32	1526	6894
430000	湖南	2016	140.68	38.88	69158	5.7	30715	16344	99.8	4687	54.79	24431	452	5.55	86	21.94	5.92	1309	5722
430000	湖南	2017	148.83	43.51	76383	5.7	31066	19582	100.7	4570	59.81	24881	534	6.02	92	33.3	9.2	1578	6549
430000	湖南	2018	134.54	49.64	89668	5.5	33523	24155	100.8	4421	57.1	22480	510	5.77	105	25.5	9.9	3870	7620
430000	湖南	2019	144.83	60.7	98085	6.2	40503	23584	100.8		406.9	26400	575	40.71	119	24.4	16.7	5980	7860
430000	湖南	2020	139.87	61.76	100019	6.2	46038	27782	100.3		68.4	32315	631	6.85	110	16	10.5	3732	6129
430000	湖南	2021	134.98	67.8	111988	6.1	49682	31077	100.7		97.5	66283	675	9.75	122	59.3	55.5	8851	11777
620000	甘肃	2010	29.78	8.1	28769	2.8	15364	1226	98.6	82	15.97	22992	82		27	2.67	0.71	421	571
620000	甘肃	2011	33.07	7.08	28503	2.5	16193	1283	99.7	80	16.2	20199	84	1.65	24	1.71	0.71	345	815
620000	甘肃	2012	49.87	9.07	35478	2.6	17270	1775	99.9	82	19.45	19089	103	1.97	25	5.79	0.33	352	864
620000	甘肃	2013	59.76	9.87	39989	2.5	19808	3331	99.9	82	19.19	21900	124	1.93	22	4.22	0.24	135	463
620000	甘肃	2014	49.6	11.8	46981	2.5	20419	3774	99.6	82	22.12	21499	190	2.23	22	15.96	5.82	374	704
620000	甘肃	2015	62.76	13.84	55246	2.5	26491	4818	100.1	82	22.7	20342	191	2.31	24	14.06	1.33	369	711
620000	甘肃	2016	63.84	16	58837	2.7	33723	5495	100	82	31.18	27749	227	3.14	48	25.82	2.46	374	1039
620000	甘肃	2017	64.59	18.04	63705	2.8	35592	5959	101.5	81	29.11	33781	286	2.93	45	26.3	7.5	388	2004
620000	甘肃	2018	72.52	18.83	69608	2.7	34905	5870	100.9	1672	40.5	32590	351	4.08	44	35.8	6.3	1370	1770
620000	甘肃	2019	84.85	19.65	68623	2.8	36419	5553	99.9		34.8	26480	343	3.51	42	14.9	6.7	1050	1650
620000	甘肃	2020	88.43	20.91	71080	2.9	36888	6365	100.2		326.2	16812	347	32.63	36	5.5	2.6	691	942
620000	甘肃	2021	82.71	22.67	75521	3	40309	7131	101.4		71	35873	392	7.15	55	8.7	5.7	832	1034
350000	福建	2010	27.1	13.1	35654	3.7	19582	3829	98.3	1316	94.66	41002	449		57	32.68	3.4	1001	2636
350000	福建	2011	35.86	15.82	41715	3.8	21956	4622	98.6	1301	434.57	51208	454	44.47	49	27.84	1.24	557	1620
350000	福建	2012	46.07	17.09	47017	3.6	30545	5082	98.6	1083	103.79	32111	341	10.5	53	40.31	1.04	914	2316
350000	福建	2013	57.88	21.14	53391	4	36042	7234	98.5	1126	109.98	41565	506	11.02	57	47.38	0.78	415	2226
350000	福建	2014	64.18	23.38	57796	4	34014	9927	97.9	1170	108	41824	393	10.84	57	47.82	1	350	2505
350000	福建	2015	84.82	26.12	61039	4.3	31468	11493	99.1	1168	85.29	27601	397	8.56	56	45.18	0.97	324	2284
350000	福建	2016	81.26	28.21	67018	4.2	34641	12883	98.8	1183	85.61	22859	429	8.6	58	49.54	1.94	497	3147
350000	福建	2017	87.34	31.92	73532	4.3	34232	16348	101	1183	76.65	26614	426	7.72	59	184.9	1.7	445	2680
350000	福建	2018	84.73	35.97	82559	4.3	38296	19022	100.3	711	81.1	34040	454	8.15	54	54.1	2.1	680	2180
350000	福建	2019	104	35.81	84160	4.2	42862	25113	99.8		85.6	42950	455	8.58	57	66.9	14.1	2170	3690
350000	福建	2020	112.88	38.51	93079	4.2	44934	30424	101.1		97.4	33720	558	9.77	64	21.9	7.9	1416	1673
350000	福建	2021	104.82	39.21	96891	4	49984	37098	101.5		74.8	30104	545	7.49	72	37.7	8.9	1749	2968
540000	西藏	2010	12.48	3.1	50858	0.6		169	96.2	8	2.24	3803	37		21	3.52	0.34	116	687
540000	西藏	2011	18.91	3.55	55133	0.6		172	96.4	8	2.48	2064	47	0.28	21	4.1	0.3	69	350
540000	西藏	2012	24.18	3.41	57178	0.6		173	97.8	8	8.05	2243	92	0.87	22	1.43	0.43	120	316
540000	西藏	2013	22.51	4.09	62046	0.7		363	99.3	8	3.67	2573	79	0.46	14	0.45	0.44	98	104
540000	西藏	2014	34.1	4.7	67735	0.7		485	96.9	12	4.52	4116	88	0.54	14	0.34	0.1	52	90
540000	西藏	2015	34.73	7.33	114097	0.7		512	100.5	12	5.5	3898	87	0.57	14	0.35	0.08	33	98
540000	西藏	2016	34.85	8.65	117844	0.7		515	100.7	12	5.53	3907	87	0.58	14	0.18	0.12	51	72
540000	西藏	2017	44.93	8.8	112333	0.8		513	100.4	1	5.59	4281	87	0.58	15	0.6	0.5	49	74
540000	西藏	2018	46.02	9.4	108799	0.9		1013	99.6	1	5.9	4400	86	0.65	14	0.1	0.1	20	40
540000	西藏	2019	57.55	6.81	113757	0.6		984	100		6.5	5490	85	0.67	15	0.4	0.3	580	600
540000	西藏	2020	59.43	7.03	108769	0.7	57603	1011	99.5		6.4	3657	87	0.66	25	0.7	0.7	108	109
540000	西藏	2021	46.56	8.47	129745	0.7	63557	1014	100.3		6.2	3272	89	0.64	27	0.7	0.7	38	45
520000	贵州	2010	23.98	4.5	24531	1.8	12010	1480	100.1	736	4.69	5677	52		7	0.65	0.28	129	339
520000	贵州	2011	35.31	5.81	29999	1.9	14255	1515	98.1	672	4.78	4236	45	0.55	11	0.66	0.27	47	412
520000	贵州	2012	49.85	5.88	35937	1.6	17100	1765	98.4	839	10.34	6643	79	1.22	10	0.62	0.41	274	295
520000	贵州	2013	48.68	8.15	43319	1.9	20643	2853	98.6	875	15.14	12295	106	1.63	6
520000	贵州	2014	54.69	9.75	48944	2	23728	3476	98.6	875	8.81	6114	105	1.65	7	0.03	0.03	20	28
520000	贵州	2015	61.2	11.85	57257	2.1	27813	4616	98.8	869	7.56	6825	95	0.84	8	0.06	0.05	0	80
520000	贵州	2016	67.34	15.29	67427	2.3	31491	5829	98.9	835	10.52	8174	113	1.07	12	5.96	0.07		55
520000	贵州	2017	64.73	18.31	75629	2.4	34121	8782	99.7	833	14.56	27126	137	1.47	9	0.4	0.3	0	34
520000	贵州	2018	60.8	20.65	87154	2.4	35720	9258	100.7	772	12.7	12310	153	1.31	15	0.6	0.5	100	100
520000	贵州	2019	68.76	19.74	86338	2.3	36514	9162	99.7		20.9	11270	158	2.15	18	0.9	0.7	450	460
520000	贵州	2020	72.76	20.95	85191	2.4	41040	10059	99.5		14.4	5807	200	1.47	31	0.2	0.2	24	37
520000	贵州	2021	117.08	22.16	86242	2.5	46069	11518	101.4		17.1	15255	133	1.71	23	17.3	16.2	342	694
210000	辽宁	2010	56.76	18.6	36478	5.1	20363	3782	97.3	526	16.06	8110	239		58	10.4	5.97	1893	3310
210000	辽宁	2011	68.6	21.28	40272	5.2	23931	3867	97.5	487	6.22	4617	200	1.35	61	8.92	2.34	1055	2826
210000	辽宁	2012	79.25	21.94	43515	5.1	25503	4880	99.1	487	12.46	7920	155	1.48	111	17.44	9.01	3192	5029
210000	辽宁	2013	95.34	25.8	46818	5.5	26765	7967	99.5	483	16.34	8507	212	1.81	33	4.3	1.83	944	1516
210000	辽宁	2014	92.6	24.52	46833	5.3	27238	8745	99.6	481	15.06	8262	207	1.57	33	4.69	1.63	515	1345
210000	辽宁	2015	88.59	25.37	49918	5.1	30660	9416	100.3	1003	23.42	9056	263	2.4	105	16.5	8.05	536	3820
210000	辽宁	2016	84.7	26.37	52202	5	29453	10218	100.4	1003	17.41	5652	246	1.82	123	31.22	15.04	922	5377
210000	辽宁	2017	86.44	26.15	55137	4.7	32444	11215	98.7	356	11.8	5179	187	1.3	121	24.9	16.4	707	7424
210000	辽宁	2018	71.59	26.6	65567	4.1	34072	12712	98.3	52	13.1	8190	192	1.34	121	31	12.7	2210	14020
210000	辽宁	2019	85.98	31.27	68134	4.5	37557	11952	100.2		78.1	8360	238	7.83	97	21.7	17.6	4410	5340
210000	辽宁	2020	89.73	39.03	87366	4.4	37708	14359	96.9		8.5	4736	186	0.85	93	7.8	4.5	1317	1866
210000	辽宁	2021	84.36	36.63	83719	4.3	39376	15183	101.1		12.8	5147	184	1.28	85	25.9	23.6	3151	3827
500000	重庆	2010	24.04	8.8	34163	2.6	18900	2128	95	620	52.78	20968	381		46	29.38	2.01	752	5831
500000	重庆	2011	31.16	11.29	43786	2.6	22117	2394	93.2	620	35.95	15310	282	3.73	46	137.29	0.93	883	5433
500000	重庆	2012	33.08	12.31	46882	2.6	31373	3156	98.2	601	23.71	11760	244	2.55	31	3.38	0.55	392	816
500000	重庆	2013	34.94	13.96	53723	2.6	36085	5682	98.7	897	47.38	14099	443	4.81	15	0.55	0.53	183	194
500000	重庆	2014	36.02	15.48	59598	2.6	39946	6896	99.7	852	61.17	15575	512	6.21	15	0.6	0.49	158	229
500000	重庆	2015	47.01	17.59	61544	2.9	42064	9173	100.1	612	94.99	22225	730	9.58	22	1.44	1.2	97	586
500000	重庆	2016	47.98	18.92	65146	2.9	44979	11155	102.4	607	89.85	30806	770	9	22	1.16	0.96	166	733
500000	重庆	2017	48.89	21.96	69873	3.2	47814	13588	102.6	601	151.45	33710	1283	15.16	24	0.8	0.6	97	425
500000	重庆	2018	49.31	22.74	79351	2.8	49472	16975	100.8	1643	189.3	51430	1571	18.95	43	6.2	3.9	970	1280
500000	重庆	2019	55.24	22.61	82344	2.7	50542	16681	100.7		197.6	29760	1646	19.82	49	20.3	5.3	490	1180
500000	重庆	2020	64.89	23.74	86261	2.7	47678	17272	99.3		129.2	17341	1265	12.93	51	9.4	8.1	645	779
500000	重庆	2021	64.23	25.63	93912	2.7	50926	19118	101		123.9	23943	1286	12.39	62	6.5	5.6	1059	1305
610000	陕西	2010	47.86	13.7	29724	4.6	17719	2554	98.3	1597	20.48	30934	127		97	5.05	2.63	1242	2180
610000	陕西	2011	61.27	16.39	33425	4.9	19358	2794	96.3	1597	24.56	21688	115	2.6	90	8.65	2.33	1044	2661
610000	陕西	2012	91.81	19.41	38995	5	23631	3231	99	1600	22.69	24183	116	2.33	98	9.82	3.28	1589	2730
610000	陕西	2013	100.44	21.17	46364	4.6	24069	5611	99.6	1597	24.35	26812	119	2.48	86	8.19	2.27	1023	2480
610000	陕西	2014	93.23	21.27	47853	4.5	25549	6322	98.5	1595	23.19	21101	143	2.4	85	8.14	1.88	910	1880
610000	陕西	2015	103.09	26.51	52918	5	28439	7052	101.8	1577	33.16	43224	177	3.36	88	12.63	3.01	1183	2313
610000	陕西	2016	125.85	27.75	55946	5	29999	7690	96.6	1577	38.43	32413	281	3.88	92	8.58	5.02	1478	2517
610000	陕西	2017	121.95	31.87	57597	5.6	31957	8848	100.4	1577	59.12	42516	462	5.96	120	20.2	12.2	1482	3479
610000	陕西	2018	126.11	33.47	60860	5.6	34424	13799	101.9	1423	82.8	49380	531	8.34	102	29.1	10.3	2110	3730
610000	陕西	2019	127.58	37.64	65406	5.7	37815	13420	100.3		55.4	47200	516	5.58	114	43.3	11.9	2360	4120
610000	陕西	2020	140.57	38.27	68473	5.6	40147	15199	100.5		46.1	31742	591	4.62	106	17.1	7.2	2056	2548
610000	陕西	2021	161.76	40.52	72929	5.5	44631	15777	101.4		72.9	42977	577	7.31	102	25.9	13.6	754	1386
630000	青海	2010	11.57	2.7	38694	0.7	12377	394	96.9	185	3.19	2260	32		20	7.2	0.3	74	594
630000	青海	2011	14.32	3.01	42506	0.7	14116	404	99.3	93	3.88	2754	38	0.41	22	5.6	0.2	24	383
630000	青海	2012	18.92	3.51	45084	0.8	20627	457	99.9	183	4.78	4142	40	0.49	23	6.81	0.16	37	425
630000	青海	2013	25.84	4.03	49730	0.8	28538	888	97.4	189	2.85	1635	37	0.31	16	4.02	0.17	43	518
630000	青海	2014	34.16	4.74	55759	0.9	30022	1056	96.9	189	3.04	2613	64	0.32	16	1.92	0.16	50	555
630000	青海	2015	33.6	5	59077	0.9	31282	1183	99.6	189	3.28	3333	54	0.35	16	2.03	0.43	70	586
630000	青海	2016	33.32	5.4	67319	0.8	39689	1301	99	189	6.61	2844	60	0.68	20	2.8	0.86	104	686
630000	青海	2017	37.58	6.82	78577	0.9	40956	1992	100.7	189	3.46	2448	48	0.39	19	2.8	0.6	57	447
630000	青海	2018	35.49	6.67	80991	0.8	43044	1766	102.8	189	5.3	4240	84	0.58	27	2.4	0.6	250	1060
630000	青海	2019	42.39	6.32	78602	0.8	50160	1865	100.4		4.9	2130	100	0.52	39	5.7	3.5	120	810
630000	青海	2020	45.93	7.06	85283	0.8	39187	2107	98.7		4.7	1736	122	0.48	37	2.8	1.3	49	663
630000	青海	2021	36.99	7.26	88784	0.8	43020	2418	102.8		15.1	11095	116	1.52	44	49.7	46.2	329	987
230000	黑龙江	2010	39.5	11.8	29827	3.9	13993	1793	95.5	10	8.91	8184	89		44	2.53	0.48	335	1729
230000	黑龙江	2011	44.94	13.26	32918	4.1	15580	1856	95.1	582	10.1	8285	88	1.12	44	2.62	0.7	546	1029
230000	黑龙江	2012	47.27	15.34	36117	4.2	16878	2026	97.9	582	7.91	7216	85	0.85	43	3.9	2.91	346	773
230000	黑龙江	2013	52.37	17.87	39644	4.6	19033	3988	96.3	388	4.73	4044	35	0.5	35	1.19	0.29	156	546
230000	黑龙江	2014	45.63	17.58	43083	4.1	23344	4133	99.4	377	4.92	3107	39	0.57	34	1.17	0.67	323	559
230000	黑龙江	2015	53.17	20.2	50931	4	23913	4464	102	350	7.08	3276	51	0.78	38	1.91	0.94	258	536
230000	黑龙江	2016	53.21	21.75	55056	3.9	25032	4920	102.4	469	5.94	3319	57	0.64	48	3.46	2.59	467	1084
230000	黑龙江	2017	53.56	22.5	58391	3.8	26825	6301	98.7	363	7.05	3326	71	0.78	51	4.4	2.7	360	1585
230000	黑龙江	2018	46.2	21.67	62263	3.5	29379	6496	97.5	336	13.2	5870	90	1.37	56	4.6	1.7	1310	1550
230000	黑龙江	2019	54.7	18	63598	2.8	33856	6322	98.6		13.3	4170	87	1.36	64	5.2	2.5	690	1360
230000	黑龙江	2020	58.37	16.05	64342	2.5	35035	7565	100		5	1432	82	0.5	64	2.4	2	238	365
230000	黑龙江	2021	55.42	16.83	71787	2.3	41714	7737	102		6.5	2287	97	0.65	62	3.4	3.2	435	502

## Sheet: 转换说明
项目	值
源文件	体育产业数据.xlsx
源Sheet	Sheet3
转换时间	2025-11-25 16:37:22
总行数	372
总列数	20
指标数量	17
年份数量	13
年份范围	2010-2022
地区列	地区
指标列	指标名称
单位列	单位

## Sheet: 原始数据
行政区划代码	地区	长江经济带	经度	纬度	一级标题	指标名称	指标全称	单位	指标解释	2010	2011	2012	2013	2014	2015	2016	2017	2018	2019	2020	2021	2022
310000	上海	1	121.474	31.2304	综合	文化、体育和娱乐业法人单位数	综合-法人单位数-分行业法人单位数-文化、体育和娱乐业法人单位数	个	在我国境内从事新闻和出版业，广播、电视、电影和录音制作业，文化艺术业，体育，娱乐业活动的法人单位数量。根据经济普查数据和相关统计资料对2013年、2018年农、林、牧、渔业法人单位数及法人单位合计数进行了修订。来自：www.macrodatas.cn	4166	4453	4941	6266	6864	7315	7621	8172	12599	12802	13669	13791
530000	云南	1	102.71	25.0458	综合	文化、体育和娱乐业法人单位数	综合-法人单位数-分行业法人单位数-文化、体育和娱乐业法人单位数	个	在我国境内从事新闻和出版业，广播、电视、电影和录音制作业，文化艺术业，体育，娱乐业活动的法人单位数量。根据经济普查数据和相关统计资料对2013年、2018年农、林、牧、渔业法人单位数及法人单位合计数进行了修订。微信公众号“马克 数据网”	2561	2809	3393	5432	6212	7768	9216	12425	14315	14523	18086	18353
150000	内蒙古	0	111.766	40.8175	综合	文化、体育和娱乐业法人单位数	综合-法人单位数-分行业法人单位数-文化、体育和娱乐业法人单位数	个	在我国境内从事新闻和出版业，广播、电视、电影和录音制作业，文化艺术业，体育，娱乐业活动的法人单位数量。根据经济普查数据和相关统计资料对2013年、2018年农、林、牧、渔业法人单位数及法人单位合计数进行了修订。更多数据：搜索“马克数据网”来源：www.macrodatas.cn	1801	1837	1900	3104	3357	3722	4575	5531	7343	8314	8950	10279
110000	北京	0	116.408	39.904	综合	文化、体育和娱乐业法人单位数	综合-法人单位数-分行业法人单位数-文化、体育和娱乐业法人单位数	个	在我国境内从事新闻和出版业，广播、电视、电影和录音制作业，文化艺术业，体育，娱乐业活动的法人单位数量。根据经济普查数据和相关统计资料对2013年、2018年农、林、牧、渔业法人单位数及法人单位合计数进行了修订。微信公众号“马克数据网”	11762	12112	12754	26787	27309	30574	29447	29908	53882	49183	82571	100015
220000	吉林	0	125.326	43.8965	综合	文化、体育和娱乐业法人单位数	综合-法人单位数-分行业法人单位数-文化、体育和娱乐业法人单位数	个	在我国境内从事新闻和出版业，广播、电视、电影和录音制作业，文化艺术业，体育，娱乐业活动的法人单位数量。根据经济普查数据和相关统计资料对2013年、2018年农、林、牧、渔业法人单位数及法人单位合计数进行了修订。来自：www.macrodatas.cn	1572	1599	1844	2736	3142	3186	3378	3516	4205	3922	4278	5086
510000	四川	1	104.076	30.6517	综合	文化、体育和娱乐业法人单位数	综合-法人单位数-分行业法人单位数-文化、体育和娱乐业法人单位数	个	在我国境内从事新闻和出版业，广播、电视、电影和录音制作业，文化艺术业，体育，娱乐业活动的法人单位数量。根据经济普查数据和相关统计资料对2013年、2018年农、林、牧、渔业法人单位数及法人单位合计数进行了修订。百度搜索“马 克 数 据 网”	4394	4576	6505	12806	15232	15893	17190	17780	26469	25914	26918	26974
120000	天津	0	117.201	39.0842	综合	文化、体育和娱乐业法人单位数	综合-法人单位数-分行业法人单位数-文化、体育和娱乐业法人单位数	个	在我国境内从事新闻和出版业，广播、电视、电影和录音制作业，文化艺术业，体育，娱乐业活动的法人单位数量。根据经济普查数据和相关统计资料对2013年、2018年农、林、牧、渔业法人单位数及法人单位合计数进行了修订。关注公众号“马克数据网”	1428	1608	1863	2544	3179	4821	7533	10716	7395	7684	9625	10486
640000	宁夏	0	106.259	38.4713	综合	文化、体育和娱乐业法人单位数	综合-法人单位数-分行业法人单位数-文化、体育和娱乐业法人单位数	个	在我国境内从事新闻和出版业，广播、电视、电影和录音制作业，文化艺术业，体育，娱乐业活动的法人单位数量。根据经济普查数据和相关统计资料对2013年、2018年农、林、牧、渔业法人单位数及法人单位合计数进行了修订。来源：马 克 数 据 网	329	333	368	1087	1149	1268	1520	1606	1647	2085	2472	2919
340000	安徽	1	117.285	31.8612	综合	文化、体育和娱乐业法人单位数	综合-法人单位数-分行业法人单位数-文化、体育和娱乐业法人单位数	个	在我国境内从事新闻和出版业，广播、电视、电影和录音制作业，文化艺术业，体育，娱乐业活动的法人单位数量。根据经济普查数据和相关统计资料对2013年、2018年农、林、牧、渔业法人单位数及法人单位合计数进行了修订。搜索“马 克 数 据 网”	2280	2653	3204	8852	11029	13372	14519	18125	21353	21037	23232	25514
370000	山东	0	117.02	36.6685	综合	文化、体育和娱乐业法人单位数	综合-法人单位数-分行业法人单位数-文化、体育和娱乐业法人单位数	个	在我国境内从事新闻和出版业，广播、电视、电影和录音制作业，文化艺术业，体育，娱乐业活动的法人单位数量。根据经济普查数据和相关统计资料对2013年、2018年农、林、牧、渔业法人单位数及法人单位合计数进行了修订。关注公众号“马克数据网”	4992	5263	6234	11541	13593	15590	21732	27862	37583	43350	50216	55878
140000	山西	0	112.562	37.8735	综合	文化、体育和娱乐业法人单位数	综合-法人单位数-分行业法人单位数-文化、体育和娱乐业法人单位数	个	在我国境内从事新闻和出版业，广播、电视、电影和录音制作业，文化艺术业，体育，娱乐业活动的法人单位数量。根据经济普查数据和相关统计资料对2013年、2018年农、林、牧、渔业法人单位数及法人单位合计数进行了修订。来源：马 克 数 据 网	2579	2727	3398	5601	6073	7360	10128	12183	13635	15417	17997	20439
440000	广东	0	113.267	23.1322	综合	文化、体育和娱乐业法人单位数	综合-法人单位数-分行业法人单位数-文化、体育和娱乐业法人单位数	个	在我国境内从事新闻和出版业，广播、电视、电影和录音制作业，文化艺术业，体育，娱乐业活动的法人单位数量。根据经济普查数据和相关统计资料对2013年、2018年农、林、牧、渔业法人单位数及法人单位合计数进行了修订。来源：马 克 数 据 网	7010	7762	9290	14695	16988	18220	20781	25782	61695	63415	66685	68046
450000	广西	0	108.328	22.8155	综合	文化、体育和娱乐业法人单位数	综合-法人单位数-分行业法人单位数-文化、体育和娱乐业法人单位数	个	在我国境内从事新闻和出版业，广播、电视、电影和录音制作业，文化艺术业，体育，娱乐业活动的法人单位数量。根据经济普查数据和相关统计资料对2013年、2018年农、林、牧、渔业法人单位数及法人单位合计数进行了修订。来自：www.macrodatas.cn	3005	3180	3489	6665	7302	7962	8818	9168	11599	12679	14253	15897
650000	新疆	0	87.6277	43.793	综合	文化、体育和娱乐业法人单位数	综合-法人单位数-分行业法人单位数-文化、体育和娱乐业法人单位数	个	在我国境内从事新闻和出版业，广播、电视、电影和录音制作业，文化艺术业，体育，娱乐业活动的法人单位数量。根据经济普查数据和相关统计资料对2013年、2018年农、林、牧、渔业法人单位数及法人单位合计数进行了修订。来源：百度“马 克 数据网”	1141	1161	1224	2925	3628	3900	4977	7664	5684	5593	6584	6691
320000	江苏	1	118.763	32.0617	综合	文化、体育和娱乐业法人单位数	综合-法人单位数-分行业法人单位数-文化、体育和娱乐业法人单位数	个	在我国境内从事新闻和出版业，广播、电视、电影和录音制作业，文化艺术业，体育，娱乐业活动的法人单位数量。根据经济普查数据和相关统计资料对2013年、2018年农、林、牧、渔业法人单位数及法人单位合计数进行了修订。来自：www.macrodatas.cn	6312	7352	9065	15410	18371	20741	28933	37550	44141	44902	47539	55633
360000	江西	1	115.909	28.6757	综合	文化、体育和娱乐业法人单位数	综合-法人单位数-分行业法人单位数-文化、体育和娱乐业法人单位数	个	在我国境内从事新闻和出版业，广播、电视、电影和录音制作业，文化艺术业，体育，娱乐业活动的法人单位数量。根据经济普查数据和相关统计资料对2013年、2018年农、林、牧、渔业法人单位数及法人单位合计数进行了修订。关注公众号“马 克 数 据 网”	2303	2357	2899	5098	6084	6586	7479	9369	10752	11180	14443	17659
130000	河北	0	114.469	38.0371	综合	文化、体育和娱乐业法人单位数	综合-法人单位数-分行业法人单位数-文化、体育和娱乐业法人单位数	个	在我国境内从事新闻和出版业，广播、电视、电影和录音制作业，文化艺术业，体育，娱乐业活动的法人单位数量。根据经济普查数据和相关统计资料对2013年、2018年农、林、牧、渔业法人单位数及法人单位合计数进行了修订。微信公众号“马克 数据网”	2272	2322	2675	7388	7901	8614	10845	16678	23852	24147	27088	29902
410000	河南	0	113.754	34.7655	综合	文化、体育和娱乐业法人单位数	综合-法人单位数-分行业法人单位数-文化、体育和娱乐业法人单位数	个	在我国境内从事新闻和出版业，广播、电视、电影和录音制作业，文化艺术业，体育，娱乐业活动的法人单位数量。根据经济普查数据和相关统计资料对2013年、2018年农、林、牧、渔业法人单位数及法人单位合计数进行了修订。更多数据：搜索“马克数据网”来源：www.macrodatas.cn	3750	3856	4574	13048	15757	17609	15552	18163	34229	33538	36426	42011
330000	浙江	1	120.153	30.2674	综合	文化、体育和娱乐业法人单位数	综合-法人单位数-分行业法人单位数-文化、体育和娱乐业法人单位数	个	在我国境内从事新闻和出版业，广播、电视、电影和录音制作业，文化艺术业，体育，娱乐业活动的法人单位数量。根据经济普查数据和相关统计资料对2013年、2018年农、林、牧、渔业法人单位数及法人单位合计数进行了修订。来源：百度搜索“马克数据网”	5274	6044	7218	14697	17680	21070	25203	30861	36470	42742	52742	57839
460000	海南	0	110.349	20.0174	综合	文化、体育和娱乐业法人单位数	综合-法人单位数-分行业法人单位数-文化、体育和娱乐业法人单位数	个	在我国境内从事新闻和出版业，广播、电视、电影和录音制作业，文化艺术业，体育，娱乐业活动的法人单位数量。根据经济普查数据和相关统计资料对2013年、2018年农、林、牧、渔业法人单位数及法人单位合计数进行了修订。微信公众号“马克 数据网”	662	712	832	1343	1605	1798	2027	2426	3140	3807	4337	5903
420000	湖北	1	114.342	30.5465	综合	文化、体育和娱乐业法人单位数	综合-法人单位数-分行业法人单位数-文化、体育和娱乐业法人单位数	个	在我国境内从事新闻和出版业，广播、电视、电影和录音制作业，文化艺术业，体育，娱乐业活动的法人单位数量。根据经济普查数据和相关统计资料对2013年、2018年农、林、牧、渔业法人单位数及法人单位合计数进行了修订。更多数据：www.macrodatas.cn	4486	4806	5913	10128	11787	12279	13358	16360	23539	24354	26551	29435
430000	湖南	1	112.984	28.1124	综合	文化、体育和娱乐业法人单位数	综合-法人单位数-分行业法人单位数-文化、体育和娱乐业法人单位数	个	在我国境内从事新闻和出版业，广播、电视、电影和录音制作业，文化艺术业，体育，娱乐业活动的法人单位数量。根据经济普查数据和相关统计资料对2013年、2018年农、林、牧、渔业法人单位数及法人单位合计数进行了修订。百度搜索“马 克 数 据 网”	4199	4346	4998	14474	14328	14899	16344	19582	24155	23584	27782	31077
620000	甘肃	0	103.826	36.0594	综合	文化、体育和娱乐业法人单位数	综合-法人单位数-分行业法人单位数-文化、体育和娱乐业法人单位数	个	在我国境内从事新闻和出版业，广播、电视、电影和录音制作业，文化艺术业，体育，娱乐业活动的法人单位数量。根据经济普查数据和相关统计资料对2013年、2018年农、林、牧、渔业法人单位数及法人单位合计数进行了修订。关注公众号“马克数据网”	1226	1283	1775	3331	3774	4818	5495	5959	5870	5553	6365	7131
350000	福建	0	119.295	26.1008	综合	文化、体育和娱乐业法人单位数	综合-法人单位数-分行业法人单位数-文化、体育和娱乐业法人单位数	个	在我国境内从事新闻和出版业，广播、电视、电影和录音制作业，文化艺术业，体育，娱乐业活动的法人单位数量。根据经济普查数据和相关统计资料对2013年、2018年农、林、牧、渔业法人单位数及法人单位合计数进行了修订。微信公众号“马克数据网”	3829	4622	5082	7234	9927	11493	12883	16348	19022	25113	30424	37098
540000	西藏	0	91.1172	29.6469	综合	文化、体育和娱乐业法人单位数	综合-法人单位数-分行业法人单位数-文化、体育和娱乐业法人单位数	个	在我国境内从事新闻和出版业，广播、电视、电影和录音制作业，文化艺术业，体育，娱乐业活动的法人单位数量。根据经济普查数据和相关统计资料对2013年、2018年农、林、牧、渔业法人单位数及法人单位合计数进行了修订。来源：马 克 数 据 网	169	172	173	363	485	512	515	513	1013	984	1011	1014
520000	贵州	1	106.707	26.5982	综合	文化、体育和娱乐业法人单位数	综合-法人单位数-分行业法人单位数-文化、体育和娱乐业法人单位数	个	在我国境内从事新闻和出版业，广播、电视、电影和录音制作业，文化艺术业，体育，娱乐业活动的法人单位数量。根据经济普查数据和相关统计资料对2013年、2018年农、林、牧、渔业法人单位数及法人单位合计数进行了修订。百度搜索“马 克 数 据 网”	1480	1515	1765	2853	3476	4616	5829	8782	9258	9162	10059	11518
210000	辽宁	0	123.429	41.8354	综合	文化、体育和娱乐业法人单位数	综合-法人单位数-分行业法人单位数-文化、体育和娱乐业法人单位数	个	在我国境内从事新闻和出版业，广播、电视、电影和录音制作业，文化艺术业，体育，娱乐业活动的法人单位数量。根据经济普查数据和相关统计资料对2013年、2018年农、林、牧、渔业法人单位数及法人单位合计数进行了修订。马 克 数 据 网	3782	3867	4880	7967	8745	9416	10218	11215	12712	11952	14359	15183
500000	重庆	1	106.552	29.563	综合	文化、体育和娱乐业法人单位数	综合-法人单位数-分行业法人单位数-文化、体育和娱乐业法人单位数	个	在我国境内从事新闻和出版业，广播、电视、电影和录音制作业，文化艺术业，体育，娱乐业活动的法人单位数量。根据经济普查数据和相关统计资料对2013年、2018年农、林、牧、渔业法人单位数及法人单位合计数进行了修订。微信公众号“马克数据网”	2128	2394	3156	5682	6896	9173	11155	13588	16975	16681	17272	19118
610000	陕西	0	108.954	34.2655	综合	文化、体育和娱乐业法人单位数	综合-法人单位数-分行业法人单位数-文化、体育和娱乐业法人单位数	个	在我国境内从事新闻和出版业，广播、电视、电影和录音制作业，文化艺术业，体育，娱乐业活动的法人单位数量。根据经济普查数据和相关统计资料对2013年、2018年农、林、牧、渔业法人单位数及法人单位合计数进行了修订。微信公众号“马克 数据网”	2554	2794	3231	5611	6322	7052	7690	8848	13799	13420	15199	15777
630000	青海	0	101.78	36.6209	综合	文化、体育和娱乐业法人单位数	综合-法人单位数-分行业法人单位数-文化、体育和娱乐业法人单位数	个	在我国境内从事新闻和出版业，广播、电视、电影和录音制作业，文化艺术业，体育，娱乐业活动的法人单位数量。根据经济普查数据和相关统计资料对2013年、2018年农、林、牧、渔业法人单位数及法人单位合计数进行了修订。来自马克数据网	394	404	457	888	1056	1183	1301	1992	1766	1865	2107	2418
230000	黑龙江	0	126.662	45.7423	综合	文化、体育和娱乐业法人单位数	综合-法人单位数-分行业法人单位数-文化、体育和娱乐业法人单位数	个	在我国境内从事新闻和出版业，广播、电视、电影和录音制作业，文化艺术业，体育，娱乐业活动的法人单位数量。根据经济普查数据和相关统计资料对2013年、2018年农、林、牧、渔业法人单位数及法人单位合计数进行了修订。微信公众号“马克数据网”	1793	1856	2026	3988	4133	4464	4920	6301	6496	6322	7565	7737
310000	上海	1	121.474	31.2304	就业人员和工资	文化、体育和娱乐业城镇单位就业人员	就业人员和工资-按行业分城镇单位就业人员-文化、体育和娱乐业城镇单位就业人员	万人	城镇单位就业人员指在各级国家机关、政党机关、社会团体及企业、事业单位中工作，取得工资或其他形式的劳动报酬的全部人员。包括在岗职工、再就业的离退休人员、民办教师以及在各单位中工作的外方人员和港澳台方人员、兼职人员、借用的外单位人员和第二职业者。不包括离开本单位仍保留劳动关系的职工。全国就业人员1990年及以后的数据根据劳动力调查、人口普查推算，2001年及以后数据根据第六次人口普查数据重新修订。||城镇单位数据不含私营单位。||2012年行业采用新的分类标准，与前期不可比。搜索“马 克 数 据 网”	4.7	5.2	5.1	5.9	5.7	5.6	6	6.4	5.9	7.5	6	6
530000	云南	1	102.71	25.0458	就业人员和工资	文化、体育和娱乐业城镇单位就业人员	就业人员和工资-按行业分城镇单位就业人员-文化、体育和娱乐业城镇单位就业人员	万人	城镇单位就业人员指在各级国家机关、政党机关、社会团体及企业、事业单位中工作，取得工资或其他形式的劳动报酬的全部人员。包括在岗职工、再就业的离退休人员、民办教师以及在各单位中工作的外方人员和港澳台方人员、兼职人员、借用的外单位人员和第二职业者。不包括离开本单位仍保留劳动关系的职工。全国就业人员1990年及以后的数据根据劳动力调查、人口普查推算，2001年及以后数据根据第六次人口普查数据重新修订。||城镇单位数据不含私营单位。||2012年行业采用新的分类标准，与前期不可比。关注微信公众号“马克数据网”	3.6	3.4	3.4	3.5	3.4	3.5	3.6	3.7	3.8	3.8	3.8	3.7
150000	内蒙古	0	111.766	40.8175	就业人员和工资	文化、体育和娱乐业城镇单位就业人员	就业人员和工资-按行业分城镇单位就业人员-文化、体育和娱乐业城镇单位就业人员	万人	城镇单位就业人员指在各级国家机关、政党机关、社会团体及企业、事业单位中工作，取得工资或其他形式的劳动报酬的全部人员。包括在岗职工、再就业的离退休人员、民办教师以及在各单位中工作的外方人员和港澳台方人员、兼职人员、借用的外单位人员和第二职业者。不包括离开本单位仍保留劳动关系的职工。全国就业人员1990年及以后的数据根据劳动力调查、人口普查推算，2001年及以后数据根据第六次人口普查数据重新修订。||城镇单位数据不含私营单位。||2012年行业采用新的分类标准，与前期不可比。来源：百度搜索“马克数据网”	3.3	3.3	3.3	3.5	3.5	3.5	3.5	3.7	3.3	3.2	3.2	3.1
110000	北京	0	116.408	39.904	就业人员和工资	文化、体育和娱乐业城镇单位就业人员	就业人员和工资-按行业分城镇单位就业人员-文化、体育和娱乐业城镇单位就业人员	万人	城镇单位就业人员指在各级国家机关、政党机关、社会团体及企业、事业单位中工作，取得工资或其他形式的劳动报酬的全部人员。包括在岗职工、再就业的离退休人员、民办教师以及在各单位中工作的外方人员和港澳台方人员、兼职人员、借用的外单位人员和第二职业者。不包括离开本单位仍保留劳动关系的职工。全国就业人员1990年及以后的数据根据劳动力调查、人口普查推算，2001年及以后数据根据第六次人口普查数据重新修订。||城镇单位数据不含私营单位。||2012年行业采用新的分类标准，与前期不可比。更多数据：搜索“马克数据网”来源：www.macrodatas.cn	15.3	16.5	17.1	18.1	17.4	18.3	18.7	19	19	18.6	17.9	19.2
220000	吉林	0	125.326	43.8965	就业人员和工资	文化、体育和娱乐业城镇单位就业人员	就业人员和工资-按行业分城镇单位就业人员-文化、体育和娱乐业城镇单位就业人员	万人	城镇单位就业人员指在各级国家机关、政党机关、社会团体及企业、事业单位中工作，取得工资或其他形式的劳动报酬的全部人员。包括在岗职工、再就业的离退休人员、民办教师以及在各单位中工作的外方人员和港澳台方人员、兼职人员、借用的外单位人员和第二职业者。不包括离开本单位仍保留劳动关系的职工。全国就业人员1990年及以后的数据根据劳动力调查、人口普查推算，2001年及以后数据根据第六次人口普查数据重新修订。||城镇单位数据不含私营单位。||2012年行业采用新的分类标准，与前期不可比。来源：马 克 数 据 网	3.7	3.7	3.6	3.6	3.5	3.6	3.5	3.7	3.7	3.3	3	3
510000	四川	1	104.076	30.6517	就业人员和工资	文化、体育和娱乐业城镇单位就业人员	就业人员和工资-按行业分城镇单位就业人员-文化、体育和娱乐业城镇单位就业人员	万人	城镇单位就业人员指在各级国家机关、政党机关、社会团体及企业、事业单位中工作，取得工资或其他形式的劳动报酬的全部人员。包括在岗职工、再就业的离退休人员、民办教师以及在各单位中工作的外方人员和港澳台方人员、兼职人员、借用的外单位人员和第二职业者。不包括离开本单位仍保留劳动关系的职工。全国就业人员1990年及以后的数据根据劳动力调查、人口普查推算，2001年及以后数据根据第六次人口普查数据重新修订。||城镇单位数据不含私营单位。||2012年行业采用新的分类标准，与前期不可比。搜索“马 克 数 据 网”	4.4	4.4	4.5	5.9	6.3	6.1	6.1	6.3	5.5	5.5	6.3	6.8
120000	天津	0	117.201	39.0842	就业人员和工资	文化、体育和娱乐业城镇单位就业人员	就业人员和工资-按行业分城镇单位就业人员-文化、体育和娱乐业城镇单位就业人员	万人	城镇单位就业人员指在各级国家机关、政党机关、社会团体及企业、事业单位中工作，取得工资或其他形式的劳动报酬的全部人员。包括在岗职工、再就业的离退休人员、民办教师以及在各单位中工作的外方人员和港澳台方人员、兼职人员、借用的外单位人员和第二职业者。不包括离开本单位仍保留劳动关系的职工。全国就业人员1990年及以后的数据根据劳动力调查、人口普查推算，2001年及以后数据根据第六次人口普查数据重新修订。||城镇单位数据不含私营单位。||2012年行业采用新的分类标准，与前期不可比。来自马克数据网	1.8	1.6	1.9	2.3	2.1	2.2	2.1	2.5	2.3	2.1	1.7	1.7
640000	宁夏	0	106.259	38.4713	就业人员和工资	文化、体育和娱乐业城镇单位就业人员	就业人员和工资-按行业分城镇单位就业人员-文化、体育和娱乐业城镇单位就业人员	万人	城镇单位就业人员指在各级国家机关、政党机关、社会团体及企业、事业单位中工作，取得工资或其他形式的劳动报酬的全部人员。包括在岗职工、再就业的离退休人员、民办教师以及在各单位中工作的外方人员和港澳台方人员、兼职人员、借用的外单位人员和第二职业者。不包括离开本单位仍保留劳动关系的职工。全国就业人员1990年及以后的数据根据劳动力调查、人口普查推算，2001年及以后数据根据第六次人口普查数据重新修订。||城镇单位数据不含私营单位。||2012年行业采用新的分类标准，与前期不可比。来源：百度搜索“马克数据网”	0.8	0.7	0.7	0.8	0.9	1.1	1	1	0.9	0.8	1	0.9
340000	安徽	1	117.285	31.8612	就业人员和工资	文化、体育和娱乐业城镇单位就业人员	就业人员和工资-按行业分城镇单位就业人员-文化、体育和娱乐业城镇单位就业人员	万人	城镇单位就业人员指在各级国家机关、政党机关、社会团体及企业、事业单位中工作，取得工资或其他形式的劳动报酬的全部人员。包括在岗职工、再就业的离退休人员、民办教师以及在各单位中工作的外方人员和港澳台方人员、兼职人员、借用的外单位人员和第二职业者。不包括离开本单位仍保留劳动关系的职工。全国就业人员1990年及以后的数据根据劳动力调查、人口普查推算，2001年及以后数据根据第六次人口普查数据重新修订。||城镇单位数据不含私营单位。||2012年行业采用新的分类标准，与前期不可比。微信公众号“马克 数据网”	3.4	3.3	3.6	3.4	3.4	3.2	3.4	3.2	3.3	3.7	3.5	3.5
370000	山东	0	117.02	36.6685	就业人员和工资	文化、体育和娱乐业城镇单位就业人员	就业人员和工资-按行业分城镇单位就业人员-文化、体育和娱乐业城镇单位就业人员	万人	城镇单位就业人员指在各级国家机关、政党机关、社会团体及企业、事业单位中工作，取得工资或其他形式的劳动报酬的全部人员。包括在岗职工、再就业的离退休人员、民办教师以及在各单位中工作的外方人员和港澳台方人员、兼职人员、借用的外单位人员和第二职业者。不包括离开本单位仍保留劳动关系的职工。全国就业人员1990年及以后的数据根据劳动力调查、人口普查推算，2001年及以后数据根据第六次人口普查数据重新修订。||城镇单位数据不含私营单位。||2012年行业采用新的分类标准，与前期不可比。来自：www.macrodatas.cn	6.7	6.6	6.9	7.2	7.1	7	7	7.1	7.1	6.9	7.5	8
140000	山西	0	112.562	37.8735	就业人员和工资	文化、体育和娱乐业城镇单位就业人员	就业人员和工资-按行业分城镇单位就业人员-文化、体育和娱乐业城镇单位就业人员	万人	城镇单位就业人员指在各级国家机关、政党机关、社会团体及企业、事业单位中工作，取得工资或其他形式的劳动报酬的全部人员。包括在岗职工、再就业的离退休人员、民办教师以及在各单位中工作的外方人员和港澳台方人员、兼职人员、借用的外单位人员和第二职业者。不包括离开本单位仍保留劳动关系的职工。全国就业人员1990年及以后的数据根据劳动力调查、人口普查推算，2001年及以后数据根据第六次人口普查数据重新修订。||城镇单位数据不含私营单位。||2012年行业采用新的分类标准，与前期不可比。微信公众号“马克 数据网”	4.6	4.6	4.5	4.7	4.9	4.6	4.6	4.4	4.7	4.4	4.6	4.4
440000	广东	0	113.267	23.1322	就业人员和工资	文化、体育和娱乐业城镇单位就业人员	就业人员和工资-按行业分城镇单位就业人员-文化、体育和娱乐业城镇单位就业人员	万人	城镇单位就业人员指在各级国家机关、政党机关、社会团体及企业、事业单位中工作，取得工资或其他形式的劳动报酬的全部人员。包括在岗职工、再就业的离退休人员、民办教师以及在各单位中工作的外方人员和港澳台方人员、兼职人员、借用的外单位人员和第二职业者。不包括离开本单位仍保留劳动关系的职工。全国就业人员1990年及以后的数据根据劳动力调查、人口普查推算，2001年及以后数据根据第六次人口普查数据重新修订。||城镇单位数据不含私营单位。||2012年行业采用新的分类标准，与前期不可比。更多数据：www.macrodatas.cn	9.4	9.2	9.5	10.9	11.5	11.6	11.8	11.5	10.5	13.4	12.5	13.1
450000	广西	0	108.328	22.8155	就业人员和工资	文化、体育和娱乐业城镇单位就业人员	就业人员和工资-按行业分城镇单位就业人员-文化、体育和娱乐业城镇单位就业人员	万人	城镇单位就业人员指在各级国家机关、政党机关、社会团体及企业、事业单位中工作，取得工资或其他形式的劳动报酬的全部人员。包括在岗职工、再就业的离退休人员、民办教师以及在各单位中工作的外方人员和港澳台方人员、兼职人员、借用的外单位人员和第二职业者。不包括离开本单位仍保留劳动关系的职工。全国就业人员1990年及以后的数据根据劳动力调查、人口普查推算，2001年及以后数据根据第六次人口普查数据重新修订。||城镇单位数据不含私营单位。||2012年行业采用新的分类标准，与前期不可比。搜索“马 克 数 据 网”	3.2	3.3	3.3	3.3	3.4	3.4	3.2	3.3	3.2	3.2	2.9	3.3
650000	新疆	0	87.6277	43.793	就业人员和工资	文化、体育和娱乐业城镇单位就业人员	就业人员和工资-按行业分城镇单位就业人员-文化、体育和娱乐业城镇单位就业人员	万人	城镇单位就业人员指在各级国家机关、政党机关、社会团体及企业、事业单位中工作，取得工资或其他形式的劳动报酬的全部人员。包括在岗职工、再就业的离退休人员、民办教师以及在各单位中工作的外方人员和港澳台方人员、兼职人员、借用的外单位人员和第二职业者。不包括离开本单位仍保留劳动关系的职工。全国就业人员1990年及以后的数据根据劳动力调查、人口普查推算，2001年及以后数据根据第六次人口普查数据重新修订。||城镇单位数据不含私营单位。||2012年行业采用新的分类标准，与前期不可比。更多数据：www.macrodatas.cn	2.7	3.2	2.9	3	3	3	3	2.9	2.7	2.6	2.7	3.2
320000	江苏	1	118.763	32.0617	就业人员和工资	文化、体育和娱乐业城镇单位就业人员	就业人员和工资-按行业分城镇单位就业人员-文化、体育和娱乐业城镇单位就业人员	万人	城镇单位就业人员指在各级国家机关、政党机关、社会团体及企业、事业单位中工作，取得工资或其他形式的劳动报酬的全部人员。包括在岗职工、再就业的离退休人员、民办教师以及在各单位中工作的外方人员和港澳台方人员、兼职人员、借用的外单位人员和第二职业者。不包括离开本单位仍保留劳动关系的职工。全国就业人员1990年及以后的数据根据劳动力调查、人口普查推算，2001年及以后数据根据第六次人口普查数据重新修订。||城镇单位数据不含私营单位。||2012年行业采用新的分类标准，与前期不可比。百度搜索“马 克 数 据 网”	5.7	6	6.1	7.7	7.8	7.8	7.9	8	7.9	9.2	8.9	8.9
360000	江西	1	115.909	28.6757	就业人员和工资	文化、体育和娱乐业城镇单位就业人员	就业人员和工资-按行业分城镇单位就业人员-文化、体育和娱乐业城镇单位就业人员	万人	城镇单位就业人员指在各级国家机关、政党机关、社会团体及企业、事业单位中工作，取得工资或其他形式的劳动报酬的全部人员。包括在岗职工、再就业的离退休人员、民办教师以及在各单位中工作的外方人员和港澳台方人员、兼职人员、借用的外单位人员和第二职业者。不包括离开本单位仍保留劳动关系的职工。全国就业人员1990年及以后的数据根据劳动力调查、人口普查推算，2001年及以后数据根据第六次人口普查数据重新修订。||城镇单位数据不含私营单位。||2012年行业采用新的分类标准，与前期不可比。搜索“马 克 数 据 网”	3.2	2.9	3.9	3.3	3	3.8	4.2	3.4	2.9	3	3.3	3.2
130000	河北	0	114.469	38.0371	就业人员和工资	文化、体育和娱乐业城镇单位就业人员	就业人员和工资-按行业分城镇单位就业人员-文化、体育和娱乐业城镇单位就业人员	万人	城镇单位就业人员指在各级国家机关、政党机关、社会团体及企业、事业单位中工作，取得工资或其他形式的劳动报酬的全部人员。包括在岗职工、再就业的离退休人员、民办教师以及在各单位中工作的外方人员和港澳台方人员、兼职人员、借用的外单位人员和第二职业者。不包括离开本单位仍保留劳动关系的职工。全国就业人员1990年及以后的数据根据劳动力调查、人口普查推算，2001年及以后数据根据第六次人口普查数据重新修订。||城镇单位数据不含私营单位。||2012年行业采用新的分类标准，与前期不可比。来自马克数据网	5	5.1	5.2	5.3	5.3	5.5	5.5	5	5.1	5.2	5.2	5.3
410000	河南	0	113.754	34.7655	就业人员和工资	文化、体育和娱乐业城镇单位就业人员	就业人员和工资-按行业分城镇单位就业人员-文化、体育和娱乐业城镇单位就业人员	万人	城镇单位就业人员指在各级国家机关、政党机关、社会团体及企业、事业单位中工作，取得工资或其他形式的劳动报酬的全部人员。包括在岗职工、再就业的离退休人员、民办教师以及在各单位中工作的外方人员和港澳台方人员、兼职人员、借用的外单位人员和第二职业者。不包括离开本单位仍保留劳动关系的职工。全国就业人员1990年及以后的数据根据劳动力调查、人口普查推算，2001年及以后数据根据第六次人口普查数据重新修订。||城镇单位数据不含私营单位。||2012年行业采用新的分类标准，与前期不可比。来自马克数据网	7	7.1	7.1	8.5	7.5	7.8	7.8	7.7	7.1	6.8	7.5	7.3
330000	浙江	1	120.153	30.2674	就业人员和工资	文化、体育和娱乐业城镇单位就业人员	就业人员和工资-按行业分城镇单位就业人员-文化、体育和娱乐业城镇单位就业人员	万人	城镇单位就业人员指在各级国家机关、政党机关、社会团体及企业、事业单位中工作，取得工资或其他形式的劳动报酬的全部人员。包括在岗职工、再就业的离退休人员、民办教师以及在各单位中工作的外方人员和港澳台方人员、兼职人员、借用的外单位人员和第二职业者。不包括离开本单位仍保留劳动关系的职工。全国就业人员1990年及以后的数据根据劳动力调查、人口普查推算，2001年及以后数据根据第六次人口普查数据重新修订。||城镇单位数据不含私营单位。||2012年行业采用新的分类标准，与前期不可比。更多数据：搜索“马克数据网”来源：www.macrodatas.cn	6.2	6.6	6.7	7.2	7.2	7.4	6.8	6.7	7.1	8	7.9	7.4
460000	海南	0	110.349	20.0174	就业人员和工资	文化、体育和娱乐业城镇单位就业人员	就业人员和工资-按行业分城镇单位就业人员-文化、体育和娱乐业城镇单位就业人员	万人	城镇单位就业人员指在各级国家机关、政党机关、社会团体及企业、事业单位中工作，取得工资或其他形式的劳动报酬的全部人员。包括在岗职工、再就业的离退休人员、民办教师以及在各单位中工作的外方人员和港澳台方人员、兼职人员、借用的外单位人员和第二职业者。不包括离开本单位仍保留劳动关系的职工。全国就业人员1990年及以后的数据根据劳动力调查、人口普查推算，2001年及以后数据根据第六次人口普查数据重新修订。||城镇单位数据不含私营单位。||2012年行业采用新的分类标准，与前期不可比。关注公众号“马 克 数 据 网”	1.2	1.2	1.1	1.3	1.2	1.2	1.3	1.3	1.4	1.3	1.6	1.6
420000	湖北	1	114.342	30.5465	就业人员和工资	文化、体育和娱乐业城镇单位就业人员	就业人员和工资-按行业分城镇单位就业人员-文化、体育和娱乐业城镇单位就业人员	万人	城镇单位就业人员指在各级国家机关、政党机关、社会团体及企业、事业单位中工作，取得工资或其他形式的劳动报酬的全部人员。包括在岗职工、再就业的离退休人员、民办教师以及在各单位中工作的外方人员和港澳台方人员、兼职人员、借用的外单位人员和第二职业者。不包括离开本单位仍保留劳动关系的职工。全国就业人员1990年及以后的数据根据劳动力调查、人口普查推算，2001年及以后数据根据第六次人口普查数据重新修订。||城镇单位数据不含私营单位。||2012年行业采用新的分类标准，与前期不可比。关注公众号“马克数据网”	5.1	5.4	6.3	5.6	5.7	6.3	6.5	7.2	6.7	5.9	6.1	6.3
430000	湖南	1	112.984	28.1124	就业人员和工资	文化、体育和娱乐业城镇单位就业人员	就业人员和工资-按行业分城镇单位就业人员-文化、体育和娱乐业城镇单位就业人员	万人	城镇单位就业人员指在各级国家机关、政党机关、社会团体及企业、事业单位中工作，取得工资或其他形式的劳动报酬的全部人员。包括在岗职工、再就业的离退休人员、民办教师以及在各单位中工作的外方人员和港澳台方人员、兼职人员、借用的外单位人员和第二职业者。不包括离开本单位仍保留劳动关系的职工。全国就业人员1990年及以后的数据根据劳动力调查、人口普查推算，2001年及以后数据根据第六次人口普查数据重新修订。||城镇单位数据不含私营单位。||2012年行业采用新的分类标准，与前期不可比。搜索“马 克 数 据 网”	4.6	5.2	5	5.1	5.3	5.5	5.7	5.7	5.5	6.2	6.2	6.1
620000	甘肃	0	103.826	36.0594	就业人员和工资	文化、体育和娱乐业城镇单位就业人员	就业人员和工资-按行业分城镇单位就业人员-文化、体育和娱乐业城镇单位就业人员	万人	城镇单位就业人员指在各级国家机关、政党机关、社会团体及企业、事业单位中工作，取得工资或其他形式的劳动报酬的全部人员。包括在岗职工、再就业的离退休人员、民办教师以及在各单位中工作的外方人员和港澳台方人员、兼职人员、借用的外单位人员和第二职业者。不包括离开本单位仍保留劳动关系的职工。全国就业人员1990年及以后的数据根据劳动力调查、人口普查推算，2001年及以后数据根据第六次人口普查数据重新修订。||城镇单位数据不含私营单位。||2012年行业采用新的分类标准，与前期不可比。微信公众号“马克数据网”	2.8	2.5	2.6	2.5	2.5	2.5	2.7	2.8	2.7	2.8	2.9	3
350000	福建	0	119.295	26.1008	就业人员和工资	文化、体育和娱乐业城镇单位就业人员	就业人员和工资-按行业分城镇单位就业人员-文化、体育和娱乐业城镇单位就业人员	万人	城镇单位就业人员指在各级国家机关、政党机关、社会团体及企业、事业单位中工作，取得工资或其他形式的劳动报酬的全部人员。包括在岗职工、再就业的离退休人员、民办教师以及在各单位中工作的外方人员和港澳台方人员、兼职人员、借用的外单位人员和第二职业者。不包括离开本单位仍保留劳动关系的职工。全国就业人员1990年及以后的数据根据劳动力调查、人口普查推算，2001年及以后数据根据第六次人口普查数据重新修订。||城镇单位数据不含私营单位。||2012年行业采用新的分类标准，与前期不可比。来自：www.macrodatas.cn	3.7	3.8	3.6	4	4	4.3	4.2	4.3	4.3	4.2	4.2	4
540000	西藏	0	91.1172	29.6469	就业人员和工资	文化、体育和娱乐业城镇单位就业人员	就业人员和工资-按行业分城镇单位就业人员-文化、体育和娱乐业城镇单位就业人员	万人	城镇单位就业人员指在各级国家机关、政党机关、社会团体及企业、事业单位中工作，取得工资或其他形式的劳动报酬的全部人员。包括在岗职工、再就业的离退休人员、民办教师以及在各单位中工作的外方人员和港澳台方人员、兼职人员、借用的外单位人员和第二职业者。不包括离开本单位仍保留劳动关系的职工。全国就业人员1990年及以后的数据根据劳动力调查、人口普查推算，2001年及以后数据根据第六次人口普查数据重新修订。||城镇单位数据不含私营单位。||2012年行业采用新的分类标准，与前期不可比。来源：百度搜索“马克数据网”	0.6	0.6	0.6	0.7	0.7	0.7	0.7	0.8	0.9	0.6	0.7	0.7
520000	贵州	1	106.707	26.5982	就业人员和工资	文化、体育和娱乐业城镇单位就业人员	就业人员和工资-按行业分城镇单位就业人员-文化、体育和娱乐业城镇单位就业人员	万人	城镇单位就业人员指在各级国家机关、政党机关、社会团体及企业、事业单位中工作，取得工资或其他形式的劳动报酬的全部人员。包括在岗职工、再就业的离退休人员、民办教师以及在各单位中工作的外方人员和港澳台方人员、兼职人员、借用的外单位人员和第二职业者。不包括离开本单位仍保留劳动关系的职工。全国就业人员1990年及以后的数据根据劳动力调查、人口普查推算，2001年及以后数据根据第六次人口普查数据重新修订。||城镇单位数据不含私营单位。||2012年行业采用新的分类标准，与前期不可比。来自：www.macrodatas.cn	1.8	1.9	1.6	1.9	2	2.1	2.3	2.4	2.4	2.3	2.4	2.5
210000	辽宁	0	123.429	41.8354	就业人员和工资	文化、体育和娱乐业城镇单位就业人员	就业人员和工资-按行业分城镇单位就业人员-文化、体育和娱乐业城镇单位就业人员	万人	城镇单位就业人员指在各级国家机关、政党机关、社会团体及企业、事业单位中工作，取得工资或其他形式的劳动报酬的全部人员。包括在岗职工、再就业的离退休人员、民办教师以及在各单位中工作的外方人员和港澳台方人员、兼职人员、借用的外单位人员和第二职业者。不包括离开本单位仍保留劳动关系的职工。全国就业人员1990年及以后的数据根据劳动力调查、人口普查推算，2001年及以后数据根据第六次人口普查数据重新修订。||城镇单位数据不含私营单位。||2012年行业采用新的分类标准，与前期不可比。百度搜索“马 克 数 据 网”	5.1	5.2	5.1	5.5	5.3	5.1	5	4.7	4.1	4.5	4.4	4.3
500000	重庆	1	106.552	29.563	就业人员和工资	文化、体育和娱乐业城镇单位就业人员	就业人员和工资-按行业分城镇单位就业人员-文化、体育和娱乐业城镇单位就业人员	万人	城镇单位就业人员指在各级国家机关、政党机关、社会团体及企业、事业单位中工作，取得工资或其他形式的劳动报酬的全部人员。包括在岗职工、再就业的离退休人员、民办教师以及在各单位中工作的外方人员和港澳台方人员、兼职人员、借用的外单位人员和第二职业者。不包括离开本单位仍保留劳动关系的职工。全国就业人员1990年及以后的数据根据劳动力调查、人口普查推算，2001年及以后数据根据第六次人口普查数据重新修订。||城镇单位数据不含私营单位。||2012年行业采用新的分类标准，与前期不可比。更多数据：www.macrodatas.cn	2.6	2.6	2.6	2.6	2.6	2.9	2.9	3.2	2.8	2.7	2.7	2.7
610000	陕西	0	108.954	34.2655	就业人员和工资	文化、体育和娱乐业城镇单位就业人员	就业人员和工资-按行业分城镇单位就业人员-文化、体育和娱乐业城镇单位就业人员	万人	城镇单位就业人员指在各级国家机关、政党机关、社会团体及企业、事业单位中工作，取得工资或其他形式的劳动报酬的全部人员。包括在岗职工、再就业的离退休人员、民办教师以及在各单位中工作的外方人员和港澳台方人员、兼职人员、借用的外单位人员和第二职业者。不包括离开本单位仍保留劳动关系的职工。全国就业人员1990年及以后的数据根据劳动力调查、人口普查推算，2001年及以后数据根据第六次人口普查数据重新修订。||城镇单位数据不含私营单位。||2012年行业采用新的分类标准，与前期不可比。关注微信公众号“马克数据网”	4.6	4.9	5	4.6	4.5	5	5	5.6	5.6	5.7	5.6	5.5
630000	青海	0	101.78	36.6209	就业人员和工资	文化、体育和娱乐业城镇单位就业人员	就业人员和工资-按行业分城镇单位就业人员-文化、体育和娱乐业城镇单位就业人员	万人	城镇单位就业人员指在各级国家机关、政党机关、社会团体及企业、事业单位中工作，取得工资或其他形式的劳动报酬的全部人员。包括在岗职工、再就业的离退休人员、民办教师以及在各单位中工作的外方人员和港澳台方人员、兼职人员、借用的外单位人员和第二职业者。不包括离开本单位仍保留劳动关系的职工。全国就业人员1990年及以后的数据根据劳动力调查、人口普查推算，2001年及以后数据根据第六次人口普查数据重新修订。||城镇单位数据不含私营单位。||2012年行业采用新的分类标准，与前期不可比。来源：马 克 数 据 网	0.7	0.7	0.8	0.8	0.9	0.9	0.8	0.9	0.8	0.8	0.8	0.8
230000	黑龙江	0	126.662	45.7423	就业人员和工资	文化、体育和娱乐业城镇单位就业人员	就业人员和工资-按行业分城镇单位就业人员-文化、体育和娱乐业城镇单位就业人员	万人	城镇单位就业人员指在各级国家机关、政党机关、社会团体及企业、事业单位中工作，取得工资或其他形式的劳动报酬的全部人员。包括在岗职工、再就业的离退休人员、民办教师以及在各单位中工作的外方人员和港澳台方人员、兼职人员、借用的外单位人员和第二职业者。不包括离开本单位仍保留劳动关系的职工。全国就业人员1990年及以后的数据根据劳动力调查、人口普查推算，2001年及以后数据根据第六次人口普查数据重新修订。||城镇单位数据不含私营单位。||2012年行业采用新的分类标准，与前期不可比。微信公众号“马克数据网”	3.9	4.1	4.2	4.6	4.1	4	3.9	3.8	3.5	2.8	2.5	2.3
310000	上海	1	121.474	31.2304	就业人员和工资	文化、体育和娱乐业城镇单位就业人员工资总额	就业人员和工资-按行业分城镇单位就业人员工资总额-文化、体育和娱乐业城镇单位就业人员工资总额	亿元	工资总额是税前工资，包括单位从个人工资中直接为其代扣或代缴的房费、水费、电费、住房公积金和社会保险基金个人缴纳部分等。工资总额不论是计入成本的还是不计入成本的，不论是以货币形式支付的还是以实物形式支付的，均应列入工资总额的计算范围。1995-2008年的城镇单位就业人员工资总额即为原来的城镇单位就业人员劳动报酬总额。微信公众号“马克数据网”	32.5	41.69	43.66	53.3	56.18	65.98	81.05	94.85	99.41	122.61	105.9	108.39
530000	云南	1	102.71	25.0458	就业人员和工资	文化、体育和娱乐业城镇单位就业人员工资总额	就业人员和工资-按行业分城镇单位就业人员工资总额-文化、体育和娱乐业城镇单位就业人员工资总额	亿元	工资总额是税前工资，包括单位从个人工资中直接为其代扣或代缴的房费、水费、电费、住房公积金和社会保险基金个人缴纳部分等。工资总额不论是计入成本的还是不计入成本的，不论是以货币形式支付的还是以实物形式支付的，均应列入工资总额的计算范围。1995-2008年的城镇单位就业人员工资总额即为原来的城镇单位就业人员劳动报酬总额。更多数据：www.macrodatas.cn	8.8	10.97	12.08	14.43	15.53	19.49	22.99	28.13	31.63	32.13	34.62	35.51
150000	内蒙古	0	111.766	40.8175	就业人员和工资	文化、体育和娱乐业城镇单位就业人员工资总额	就业人员和工资-按行业分城镇单位就业人员工资总额-文化、体育和娱乐业城镇单位就业人员工资总额	亿元	工资总额是税前工资，包括单位从个人工资中直接为其代扣或代缴的房费、水费、电费、住房公积金和社会保险基金个人缴纳部分等。工资总额不论是计入成本的还是不计入成本的，不论是以货币形式支付的还是以实物形式支付的，均应列入工资总额的计算范围。1995-2008年的城镇单位就业人员工资总额即为原来的城镇单位就业人员劳动报酬总额。更多数据：www.macrodatas.cn	12.5	14.43	16.37	18.19	19.41	21.17	23.04	25.86	23.3	25.3	25.92	26.21
110000	北京	0	116.408	39.904	就业人员和工资	文化、体育和娱乐业城镇单位就业人员工资总额	就业人员和工资-按行业分城镇单位就业人员工资总额-文化、体育和娱乐业城镇单位就业人员工资总额	亿元	工资总额是税前工资，包括单位从个人工资中直接为其代扣或代缴的房费、水费、电费、住房公积金和社会保险基金个人缴纳部分等。工资总额不论是计入成本的还是不计入成本的，不论是以货币形式支付的还是以实物形式支付的，均应列入工资总额的计算范围。1995-2008年的城镇单位就业人员工资总额即为原来的城镇单位就业人员劳动报酬总额。微信公众号“马克数据网”	118	152.06	179.15	203.67	212.9	239.32	259.52	287.16	331.74	384.18	393.14	423.28
220000	吉林	0	125.326	43.8965	就业人员和工资	文化、体育和娱乐业城镇单位就业人员工资总额	就业人员和工资-按行业分城镇单位就业人员工资总额-文化、体育和娱乐业城镇单位就业人员工资总额	亿元	工资总额是税前工资，包括单位从个人工资中直接为其代扣或代缴的房费、水费、电费、住房公积金和社会保险基金个人缴纳部分等。工资总额不论是计入成本的还是不计入成本的，不论是以货币形式支付的还是以实物形式支付的，均应列入工资总额的计算范围。1995-2008年的城镇单位就业人员工资总额即为原来的城镇单位就业人员劳动报酬总额。来源：马 克 数 据 网	10	11.41	12.41	13.61	14.17	18.64	19.86	21.14	23.43	21.51	19.88	21.19
510000	四川	1	104.076	30.6517	就业人员和工资	文化、体育和娱乐业城镇单位就业人员工资总额	就业人员和工资-按行业分城镇单位就业人员工资总额-文化、体育和娱乐业城镇单位就业人员工资总额	亿元	工资总额是税前工资，包括单位从个人工资中直接为其代扣或代缴的房费、水费、电费、住房公积金和社会保险基金个人缴纳部分等。工资总额不论是计入成本的还是不计入成本的，不论是以货币形式支付的还是以实物形式支付的，均应列入工资总额的计算范围。1995-2008年的城镇单位就业人员工资总额即为原来的城镇单位就业人员劳动报酬总额。来源：马 克 数 据 网	14.2	16.2	19.49	27.88	32.37	35.56	38.32	44.71	44.36	47	52.8	62.16
120000	天津	0	117.201	39.0842	就业人员和工资	文化、体育和娱乐业城镇单位就业人员工资总额	就业人员和工资-按行业分城镇单位就业人员工资总额-文化、体育和娱乐业城镇单位就业人员工资总额	亿元	工资总额是税前工资，包括单位从个人工资中直接为其代扣或代缴的房费、水费、电费、住房公积金和社会保险基金个人缴纳部分等。工资总额不论是计入成本的还是不计入成本的，不论是以货币形式支付的还是以实物形式支付的，均应列入工资总额的计算范围。1995-2008年的城镇单位就业人员工资总额即为原来的城镇单位就业人员劳动报酬总额。关注公众号“马克数据网”	9.5	9.38	12.4	15.27	16.28	19.74	23.94	30	30.07	36.43	24.84	24.6
640000	宁夏	0	106.259	38.4713	就业人员和工资	文化、体育和娱乐业城镇单位就业人员工资总额	就业人员和工资-按行业分城镇单位就业人员工资总额-文化、体育和娱乐业城镇单位就业人员工资总额	亿元	工资总额是税前工资，包括单位从个人工资中直接为其代扣或代缴的房费、水费、电费、住房公积金和社会保险基金个人缴纳部分等。工资总额不论是计入成本的还是不计入成本的，不论是以货币形式支付的还是以实物形式支付的，均应列入工资总额的计算范围。1995-2008年的城镇单位就业人员工资总额即为原来的城镇单位就业人员劳动报酬总额。更多数据：搜索“马克数据网”来源：www.macrodatas.cn	2.6	3.04	3.42	3.94	4.74	6.62	6.7	6.87	7.08	6.89	9.12	8.76
340000	安徽	1	117.285	31.8612	就业人员和工资	文化、体育和娱乐业城镇单位就业人员工资总额	就业人员和工资-按行业分城镇单位就业人员工资总额-文化、体育和娱乐业城镇单位就业人员工资总额	亿元	工资总额是税前工资，包括单位从个人工资中直接为其代扣或代缴的房费、水费、电费、住房公积金和社会保险基金个人缴纳部分等。工资总额不论是计入成本的还是不计入成本的，不论是以货币形式支付的还是以实物形式支付的，均应列入工资总额的计算范围。1995-2008年的城镇单位就业人员工资总额即为原来的城镇单位就业人员劳动报酬总额。微信公众号“马克数据网”	9.6	11.27	13.91	14.42	14.81	17.03	18.95	19.88	23.1	26.87	27.5	30.04
370000	山东	0	117.02	36.6685	就业人员和工资	文化、体育和娱乐业城镇单位就业人员工资总额	就业人员和工资-按行业分城镇单位就业人员工资总额-文化、体育和娱乐业城镇单位就业人员工资总额	亿元	工资总额是税前工资，包括单位从个人工资中直接为其代扣或代缴的房费、水费、电费、住房公积金和社会保险基金个人缴纳部分等。工资总额不论是计入成本的还是不计入成本的，不论是以货币形式支付的还是以实物形式支付的，均应列入工资总额的计算范围。1995-2008年的城镇单位就业人员工资总额即为原来的城镇单位就业人员劳动报酬总额。关注公众号“马 克 数 据 网”	27.4	28.4	33.22	40.85	44.84	49.18	54.2	57.99	60.03	60.17	72.81	80.31
140000	山西	0	112.562	37.8735	就业人员和工资	文化、体育和娱乐业城镇单位就业人员工资总额	就业人员和工资-按行业分城镇单位就业人员工资总额-文化、体育和娱乐业城镇单位就业人员工资总额	亿元	工资总额是税前工资，包括单位从个人工资中直接为其代扣或代缴的房费、水费、电费、住房公积金和社会保险基金个人缴纳部分等。工资总额不论是计入成本的还是不计入成本的，不论是以货币形式支付的还是以实物形式支付的，均应列入工资总额的计算范围。1995-2008年的城镇单位就业人员工资总额即为原来的城镇单位就业人员劳动报酬总额。更多数据：搜索“马克数据网”来源：www.macrodatas.cn	11.5	13.55	14.8	16.92	19.45	21.67	22.55	24.11	26.66	25.9	27.44	28.57
440000	广东	0	113.267	23.1322	就业人员和工资	文化、体育和娱乐业城镇单位就业人员工资总额	就业人员和工资-按行业分城镇单位就业人员工资总额-文化、体育和娱乐业城镇单位就业人员工资总额	亿元	工资总额是税前工资，包括单位从个人工资中直接为其代扣或代缴的房费、水费、电费、住房公积金和社会保险基金个人缴纳部分等。工资总额不论是计入成本的还是不计入成本的，不论是以货币形式支付的还是以实物形式支付的，均应列入工资总额的计算范围。1995-2008年的城镇单位就业人员工资总额即为原来的城镇单位就业人员劳动报酬总额。关注微信公众号“马克数据网”	44.5	48.63	52.29	71.35	80.27	93.92	111.04	120.48	124.15	174.22	165.79	173.53
450000	广西	0	108.328	22.8155	就业人员和工资	文化、体育和娱乐业城镇单位就业人员工资总额	就业人员和工资-按行业分城镇单位就业人员工资总额-文化、体育和娱乐业城镇单位就业人员工资总额	亿元	工资总额是税前工资，包括单位从个人工资中直接为其代扣或代缴的房费、水费、电费、住房公积金和社会保险基金个人缴纳部分等。工资总额不论是计入成本的还是不计入成本的，不论是以货币形式支付的还是以实物形式支付的，均应列入工资总额的计算范围。1995-2008年的城镇单位就业人员工资总额即为原来的城镇单位就业人员劳动报酬总额。微信公众号“马克 数据网”	10.2	10.58	11.79	13.16	15.63	18.83	20.16	22.95	24.3	25.02	22.41	27.71
650000	新疆	0	87.6277	43.793	就业人员和工资	文化、体育和娱乐业城镇单位就业人员工资总额	就业人员和工资-按行业分城镇单位就业人员工资总额-文化、体育和娱乐业城镇单位就业人员工资总额	亿元	工资总额是税前工资，包括单位从个人工资中直接为其代扣或代缴的房费、水费、电费、住房公积金和社会保险基金个人缴纳部分等。工资总额不论是计入成本的还是不计入成本的，不论是以货币形式支付的还是以实物形式支付的，均应列入工资总额的计算范围。1995-2008年的城镇单位就业人员工资总额即为原来的城镇单位就业人员劳动报酬总额。更多数据：搜索“马克数据网”来源：www.macrodatas.cn	8.6	12.19	13.18	15	15.56	19.3	21.18	23.8	21.43	21.66	24.53	30.68
320000	江苏	1	118.763	32.0617	就业人员和工资	文化、体育和娱乐业城镇单位就业人员工资总额	就业人员和工资-按行业分城镇单位就业人员工资总额-文化、体育和娱乐业城镇单位就业人员工资总额	亿元	工资总额是税前工资，包括单位从个人工资中直接为其代扣或代缴的房费、水费、电费、住房公积金和社会保险基金个人缴纳部分等。工资总额不论是计入成本的还是不计入成本的，不论是以货币形式支付的还是以实物形式支付的，均应列入工资总额的计算范围。1995-2008年的城镇单位就业人员工资总额即为原来的城镇单位就业人员劳动报酬总额。来自：www.macrodatas.cn	27.3	31.39	35.5	48.53	55.81	60.44	66.29	73.94	85.76	100.18	105.32	111.21
360000	江西	1	115.909	28.6757	就业人员和工资	文化、体育和娱乐业城镇单位就业人员工资总额	就业人员和工资-按行业分城镇单位就业人员工资总额-文化、体育和娱乐业城镇单位就业人员工资总额	亿元	工资总额是税前工资，包括单位从个人工资中直接为其代扣或代缴的房费、水费、电费、住房公积金和社会保险基金个人缴纳部分等。工资总额不论是计入成本的还是不计入成本的，不论是以货币形式支付的还是以实物形式支付的，均应列入工资总额的计算范围。1995-2008年的城镇单位就业人员工资总额即为原来的城镇单位就业人员劳动报酬总额。关注微信公众号“马克数据网”	9.7	8.51	16.73	14.57	13.53	20.09	25.58	22.01	21.77	24.14	26.41	27.54
130000	河北	0	114.469	38.0371	就业人员和工资	文化、体育和娱乐业城镇单位就业人员工资总额	就业人员和工资-按行业分城镇单位就业人员工资总额-文化、体育和娱乐业城镇单位就业人员工资总额	亿元	工资总额是税前工资，包括单位从个人工资中直接为其代扣或代缴的房费、水费、电费、住房公积金和社会保险基金个人缴纳部分等。工资总额不论是计入成本的还是不计入成本的，不论是以货币形式支付的还是以实物形式支付的，均应列入工资总额的计算范围。1995-2008年的城镇单位就业人员工资总额即为原来的城镇单位就业人员劳动报酬总额。微信公众号“马克数据网”	13.2	15.46	17.55	19.23	20.9	25.21	28.26	29.4	34.17	37.29	40.26	41.46
410000	河南	0	113.754	34.7655	就业人员和工资	文化、体育和娱乐业城镇单位就业人员工资总额	就业人员和工资-按行业分城镇单位就业人员工资总额-文化、体育和娱乐业城镇单位就业人员工资总额	亿元	工资总额是税前工资，包括单位从个人工资中直接为其代扣或代缴的房费、水费、电费、住房公积金和社会保险基金个人缴纳部分等。工资总额不论是计入成本的还是不计入成本的，不论是以货币形式支付的还是以实物形式支付的，均应列入工资总额的计算范围。1995-2008年的城镇单位就业人员工资总额即为原来的城镇单位就业人员劳动报酬总额。来源：马 克 数 据 网	19.8	22.03	25.66	29.44	31.4	37.02	39.9	44.67	47.85	48.65	55.85	54.31
330000	浙江	1	120.153	30.2674	就业人员和工资	文化、体育和娱乐业城镇单位就业人员工资总额	就业人员和工资-按行业分城镇单位就业人员工资总额-文化、体育和娱乐业城镇单位就业人员工资总额	亿元	工资总额是税前工资，包括单位从个人工资中直接为其代扣或代缴的房费、水费、电费、住房公积金和社会保险基金个人缴纳部分等。工资总额不论是计入成本的还是不计入成本的，不论是以货币形式支付的还是以实物形式支付的，均应列入工资总额的计算范围。1995-2008年的城镇单位就业人员工资总额即为原来的城镇单位就业人员劳动报酬总额。更多数据：www.macrodatas.cn	34.4	40.45	44.88	52.6	56.33	64.83	66.56	73.79	81.48	89.77	96.62	101.61
460000	海南	0	110.349	20.0174	就业人员和工资	文化、体育和娱乐业城镇单位就业人员工资总额	就业人员和工资-按行业分城镇单位就业人员工资总额-文化、体育和娱乐业城镇单位就业人员工资总额	亿元	工资总额是税前工资，包括单位从个人工资中直接为其代扣或代缴的房费、水费、电费、住房公积金和社会保险基金个人缴纳部分等。工资总额不论是计入成本的还是不计入成本的，不论是以货币形式支付的还是以实物形式支付的，均应列入工资总额的计算范围。1995-2008年的城镇单位就业人员工资总额即为原来的城镇单位就业人员劳动报酬总额。来源：马 克 数 据 网	3.4	4.15	3.94	5.46	5.9	6.49	7.9	8.64	9.96	10.49	11.65	13.59
420000	湖北	1	114.342	30.5465	就业人员和工资	文化、体育和娱乐业城镇单位就业人员工资总额	就业人员和工资-按行业分城镇单位就业人员工资总额-文化、体育和娱乐业城镇单位就业人员工资总额	亿元	工资总额是税前工资，包括单位从个人工资中直接为其代扣或代缴的房费、水费、电费、住房公积金和社会保险基金个人缴纳部分等。工资总额不论是计入成本的还是不计入成本的，不论是以货币形式支付的还是以实物形式支付的，均应列入工资总额的计算范围。1995-2008年的城镇单位就业人员工资总额即为原来的城镇单位就业人员劳动报酬总额。来自：www.macrodatas.cn	16.4	18.81	23.58	25.2	29.49	37.34	39.22	49.67	53.34	49.74	53.91	60.28
430000	湖南	1	112.984	28.1124	就业人员和工资	文化、体育和娱乐业城镇单位就业人员工资总额	就业人员和工资-按行业分城镇单位就业人员工资总额-文化、体育和娱乐业城镇单位就业人员工资总额	亿元	工资总额是税前工资，包括单位从个人工资中直接为其代扣或代缴的房费、水费、电费、住房公积金和社会保险基金个人缴纳部分等。工资总额不论是计入成本的还是不计入成本的，不论是以货币形式支付的还是以实物形式支付的，均应列入工资总额的计算范围。1995-2008年的城镇单位就业人员工资总额即为原来的城镇单位就业人员劳动报酬总额。来源：百度“马 克 数据网”	15.2	19.98	21.48	24.72	28.04	34.33	38.88	43.51	49.64	60.7	61.76	67.8
620000	甘肃	0	103.826	36.0594	就业人员和工资	文化、体育和娱乐业城镇单位就业人员工资总额	就业人员和工资-按行业分城镇单位就业人员工资总额-文化、体育和娱乐业城镇单位就业人员工资总额	亿元	工资总额是税前工资，包括单位从个人工资中直接为其代扣或代缴的房费、水费、电费、住房公积金和社会保险基金个人缴纳部分等。工资总额不论是计入成本的还是不计入成本的，不论是以货币形式支付的还是以实物形式支付的，均应列入工资总额的计算范围。1995-2008年的城镇单位就业人员工资总额即为原来的城镇单位就业人员劳动报酬总额。微信公众号“马克数据网”	8.1	7.08	9.07	9.87	11.8	13.84	16	18.04	18.83	19.65	20.91	22.67
350000	福建	0	119.295	26.1008	就业人员和工资	文化、体育和娱乐业城镇单位就业人员工资总额	就业人员和工资-按行业分城镇单位就业人员工资总额-文化、体育和娱乐业城镇单位就业人员工资总额	亿元	工资总额是税前工资，包括单位从个人工资中直接为其代扣或代缴的房费、水费、电费、住房公积金和社会保险基金个人缴纳部分等。工资总额不论是计入成本的还是不计入成本的，不论是以货币形式支付的还是以实物形式支付的，均应列入工资总额的计算范围。1995-2008年的城镇单位就业人员工资总额即为原来的城镇单位就业人员劳动报酬总额。来源：百度搜索“马克数据网”	13.1	15.82	17.09	21.14	23.38	26.12	28.21	31.92	35.97	35.81	38.51	39.21
540000	西藏	0	91.1172	29.6469	就业人员和工资	文化、体育和娱乐业城镇单位就业人员工资总额	就业人员和工资-按行业分城镇单位就业人员工资总额-文化、体育和娱乐业城镇单位就业人员工资总额	亿元	工资总额是税前工资，包括单位从个人工资中直接为其代扣或代缴的房费、水费、电费、住房公积金和社会保险基金个人缴纳部分等。工资总额不论是计入成本的还是不计入成本的，不论是以货币形式支付的还是以实物形式支付的，均应列入工资总额的计算范围。1995-2008年的城镇单位就业人员工资总额即为原来的城镇单位就业人员劳动报酬总额。来源：百度搜索“马克数据网”	3.1	3.55	3.41	4.09	4.7	7.33	8.65	8.8	9.4	6.81	7.03	8.47
520000	贵州	1	106.707	26.5982	就业人员和工资	文化、体育和娱乐业城镇单位就业人员工资总额	就业人员和工资-按行业分城镇单位就业人员工资总额-文化、体育和娱乐业城镇单位就业人员工资总额	亿元	工资总额是税前工资，包括单位从个人工资中直接为其代扣或代缴的房费、水费、电费、住房公积金和社会保险基金个人缴纳部分等。工资总额不论是计入成本的还是不计入成本的，不论是以货币形式支付的还是以实物形式支付的，均应列入工资总额的计算范围。1995-2008年的城镇单位就业人员工资总额即为原来的城镇单位就业人员劳动报酬总额。微信公众号“马克数据网”	4.5	5.81	5.88	8.15	9.75	11.85	15.29	18.31	20.65	19.74	20.95	22.16
210000	辽宁	0	123.429	41.8354	就业人员和工资	文化、体育和娱乐业城镇单位就业人员工资总额	就业人员和工资-按行业分城镇单位就业人员工资总额-文化、体育和娱乐业城镇单位就业人员工资总额	亿元	工资总额是税前工资，包括单位从个人工资中直接为其代扣或代缴的房费、水费、电费、住房公积金和社会保险基金个人缴纳部分等。工资总额不论是计入成本的还是不计入成本的，不论是以货币形式支付的还是以实物形式支付的，均应列入工资总额的计算范围。1995-2008年的城镇单位就业人员工资总额即为原来的城镇单位就业人员劳动报酬总额。关注公众号“马 克 数 据 网”	18.6	21.28	21.94	25.8	24.52	25.37	26.37	26.15	26.6	31.27	39.03	36.63
500000	重庆	1	106.552	29.563	就业人员和工资	文化、体育和娱乐业城镇单位就业人员工资总额	就业人员和工资-按行业分城镇单位就业人员工资总额-文化、体育和娱乐业城镇单位就业人员工资总额	亿元	工资总额是税前工资，包括单位从个人工资中直接为其代扣或代缴的房费、水费、电费、住房公积金和社会保险基金个人缴纳部分等。工资总额不论是计入成本的还是不计入成本的，不论是以货币形式支付的还是以实物形式支付的，均应列入工资总额的计算范围。1995-2008年的城镇单位就业人员工资总额即为原来的城镇单位就业人员劳动报酬总额。关注微信公众号“马克数据网”	8.8	11.29	12.31	13.96	15.48	17.59	18.92	21.96	22.74	22.61	23.74	25.63
610000	陕西	0	108.954	34.2655	就业人员和工资	文化、体育和娱乐业城镇单位就业人员工资总额	就业人员和工资-按行业分城镇单位就业人员工资总额-文化、体育和娱乐业城镇单位就业人员工资总额	亿元	工资总额是税前工资，包括单位从个人工资中直接为其代扣或代缴的房费、水费、电费、住房公积金和社会保险基金个人缴纳部分等。工资总额不论是计入成本的还是不计入成本的，不论是以货币形式支付的还是以实物形式支付的，均应列入工资总额的计算范围。1995-2008年的城镇单位就业人员工资总额即为原来的城镇单位就业人员劳动报酬总额。百度搜索“马 克 数 据 网”	13.7	16.39	19.41	21.17	21.27	26.51	27.75	31.87	33.47	37.64	38.27	40.52
630000	青海	0	101.78	36.6209	就业人员和工资	文化、体育和娱乐业城镇单位就业人员工资总额	就业人员和工资-按行业分城镇单位就业人员工资总额-文化、体育和娱乐业城镇单位就业人员工资总额	亿元	工资总额是税前工资，包括单位从个人工资中直接为其代扣或代缴的房费、水费、电费、住房公积金和社会保险基金个人缴纳部分等。工资总额不论是计入成本的还是不计入成本的，不论是以货币形式支付的还是以实物形式支付的，均应列入工资总额的计算范围。1995-2008年的城镇单位就业人员工资总额即为原来的城镇单位就业人员劳动报酬总额。来源：百度“马 克 数据网”	2.7	3.01	3.51	4.03	4.74	5	5.4	6.82	6.67	6.32	7.06	7.26
230000	黑龙江	0	126.662	45.7423	就业人员和工资	文化、体育和娱乐业城镇单位就业人员工资总额	就业人员和工资-按行业分城镇单位就业人员工资总额-文化、体育和娱乐业城镇单位就业人员工资总额	亿元	工资总额是税前工资，包括单位从个人工资中直接为其代扣或代缴的房费、水费、电费、住房公积金和社会保险基金个人缴纳部分等。工资总额不论是计入成本的还是不计入成本的，不论是以货币形式支付的还是以实物形式支付的，均应列入工资总额的计算范围。1995-2008年的城镇单位就业人员工资总额即为原来的城镇单位就业人员劳动报酬总额。更多数据：www.macrodatas.cn	11.8	13.26	15.34	17.87	17.58	20.2	21.75	22.5	21.67	18	16.05	16.83
310000	上海	1	121.474	31.2304	就业人员和工资	文化、体育和娱乐业城镇单位就业人员平均工资	就业人员和工资-按行业分城镇单位就业人员平均工资-文化、体育和娱乐业城镇单位就业人员平均工资	元	平均工资指单位就业人员在一定时期内平均每人所得的货币工资额。它表明一定时期职工工资收入的高低程度，是反映就业人员工资水平的主要指标。计算公式为:平均工资=报告期实际支付的全部就业人员工资总额/报告期全部就业人员平均人数来源：马 克 数 据 网	68533	81409	83701	90056	96303	117099	129644	145257	165573	161284	174370	180734
530000	云南	1	102.71	25.0458	就业人员和工资	文化、体育和娱乐业城镇单位就业人员平均工资	就业人员和工资-按行业分城镇单位就业人员平均工资-文化、体育和娱乐业城镇单位就业人员平均工资	元	平均工资指单位就业人员在一定时期内平均每人所得的货币工资额。它表明一定时期职工工资收入的高低程度，是反映就业人员工资水平的主要指标。计算公式为:平均工资=报告期实际支付的全部就业人员工资总额/报告期全部就业人员平均人数来源：百度“马 克 数据网”	24834	32058	35997	41914	46209	56135	63017	76032	83405	85090	91621	95112
150000	内蒙古	0	111.766	40.8175	就业人员和工资	文化、体育和娱乐业城镇单位就业人员平均工资	就业人员和工资-按行业分城镇单位就业人员平均工资-文化、体育和娱乐业城镇单位就业人员平均工资	元	平均工资指单位就业人员在一定时期内平均每人所得的货币工资额。它表明一定时期职工工资收入的高低程度，是反映就业人员工资水平的主要指标。计算公式为:平均工资=报告期实际支付的全部就业人员工资总额/报告期全部就业人员平均人数更多数据：搜索“马克数据网”来源：www.macrodatas.cn	37805	44326	49701	52312	54827	60979	65311	69346	71777	78895	81138	84989
110000	北京	0	116.408	39.904	就业人员和工资	文化、体育和娱乐业城镇单位就业人员平均工资	就业人员和工资-按行业分城镇单位就业人员平均工资-文化、体育和娱乐业城镇单位就业人员平均工资	元	平均工资指单位就业人员在一定时期内平均每人所得的货币工资额。它表明一定时期职工工资收入的高低程度，是反映就业人员工资水平的主要指标。计算公式为:平均工资=报告期实际支付的全部就业人员工资总额/报告期全部就业人员平均人数关注公众号“马克数据网”	76415	92617	105785	112707	121094	130134	139087	150810	173632	205405	221193	224007
220000	吉林	0	125.326	43.8965	就业人员和工资	文化、体育和娱乐业城镇单位就业人员平均工资	就业人员和工资-按行业分城镇单位就业人员平均工资-文化、体育和娱乐业城镇单位就业人员平均工资	元	平均工资指单位就业人员在一定时期内平均每人所得的货币工资额。它表明一定时期职工工资收入的高低程度，是反映就业人员工资水平的主要指标。计算公式为:平均工资=报告期实际支付的全部就业人员工资总额/报告期全部就业人员平均人数搜索“马 克 数 据 网”	26684	30467	34017	37367	40313	50810	55335	57349	63352	65789	67641	72104
510000	四川	1	104.076	30.6517	就业人员和工资	文化、体育和娱乐业城镇单位就业人员平均工资	就业人员和工资-按行业分城镇单位就业人员平均工资-文化、体育和娱乐业城镇单位就业人员平均工资	元	平均工资指单位就业人员在一定时期内平均每人所得的货币工资额。它表明一定时期职工工资收入的高低程度，是反映就业人员工资水平的主要指标。计算公式为:平均工资=报告期实际支付的全部就业人员工资总额/报告期全部就业人员平均人数来源：百度“马 克 数据网”	32101	36944	43665	47138	51728	58860	64885	71769	80152	86139	84292	92287
120000	天津	0	117.201	39.0842	就业人员和工资	文化、体育和娱乐业城镇单位就业人员平均工资	就业人员和工资-按行业分城镇单位就业人员平均工资-文化、体育和娱乐业城镇单位就业人员平均工资	元	平均工资指单位就业人员在一定时期内平均每人所得的货币工资额。它表明一定时期职工工资收入的高低程度，是反映就业人员工资水平的主要指标。计算公式为:平均工资=报告期实际支付的全部就业人员工资总额/报告期全部就业人员平均人数更多数据：www.macrodatas.cn	54182	59627	64602	67310	77689	87264	111368	116655	131631	165288	143036	134871
640000	宁夏	0	106.259	38.4713	就业人员和工资	文化、体育和娱乐业城镇单位就业人员平均工资	就业人员和工资-按行业分城镇单位就业人员平均工资-文化、体育和娱乐业城镇单位就业人员平均工资	元	平均工资指单位就业人员在一定时期内平均每人所得的货币工资额。它表明一定时期职工工资收入的高低程度，是反映就业人员工资水平的主要指标。计算公式为:平均工资=报告期实际支付的全部就业人员工资总额/报告期全部就业人员平均人数关注公众号“马 克 数 据 网”	34118	42154	47805	48919	54120	62941	66563	67913	77093	82955	90726	92203
340000	安徽	1	117.285	31.8612	就业人员和工资	文化、体育和娱乐业城镇单位就业人员平均工资	就业人员和工资-按行业分城镇单位就业人员平均工资-文化、体育和娱乐业城镇单位就业人员平均工资	元	平均工资指单位就业人员在一定时期内平均每人所得的货币工资额。它表明一定时期职工工资收入的高低程度，是反映就业人员工资水平的主要指标。计算公式为:平均工资=报告期实际支付的全部就业人员工资总额/报告期全部就业人员平均人数更多数据：搜索“马克数据网”来源：www.macrodatas.cn	28435	34353	39138	42787	44211	52272	55773	62014	68973	72342	79224	84665
370000	山东	0	117.02	36.6685	就业人员和工资	文化、体育和娱乐业城镇单位就业人员平均工资	就业人员和工资-按行业分城镇单位就业人员平均工资-文化、体育和娱乐业城镇单位就业人员平均工资	元	平均工资指单位就业人员在一定时期内平均每人所得的货币工资额。它表明一定时期职工工资收入的高低程度，是反映就业人员工资水平的主要指标。计算公式为:平均工资=报告期实际支付的全部就业人员工资总额/报告期全部就业人员平均人数马 克 数 据 网	41008	43492	48702	56870	62056	71453	77462	81074	84445	87556	96490	100855
140000	山西	0	112.562	37.8735	就业人员和工资	文化、体育和娱乐业城镇单位就业人员平均工资	就业人员和工资-按行业分城镇单位就业人员平均工资-文化、体育和娱乐业城镇单位就业人员平均工资	元	平均工资指单位就业人员在一定时期内平均每人所得的货币工资额。它表明一定时期职工工资收入的高低程度，是反映就业人员工资水平的主要指标。计算公式为:平均工资=报告期实际支付的全部就业人员工资总额/报告期全部就业人员平均人数更多数据：www.macrodatas.cn	24927	29377	33307	36348	40133	47387	49041	53992	57050	58952	60412	64032
440000	广东	0	113.267	23.1322	就业人员和工资	文化、体育和娱乐业城镇单位就业人员平均工资	就业人员和工资-按行业分城镇单位就业人员平均工资-文化、体育和娱乐业城镇单位就业人员平均工资	元	平均工资指单位就业人员在一定时期内平均每人所得的货币工资额。它表明一定时期职工工资收入的高低程度，是反映就业人员工资水平的主要指标。计算公式为:平均工资=报告期实际支付的全部就业人员工资总额/报告期全部就业人员平均人数关注微信公众号“马克数据网”	47213	53259	56081	65268	69745	80069	93300	104446	116940	130164	133576	132893
450000	广西	0	108.328	22.8155	就业人员和工资	文化、体育和娱乐业城镇单位就业人员平均工资	就业人员和工资-按行业分城镇单位就业人员平均工资-文化、体育和娱乐业城镇单位就业人员平均工资	元	平均工资指单位就业人员在一定时期内平均每人所得的货币工资额。它表明一定时期职工工资收入的高低程度，是反映就业人员工资水平的主要指标。计算公式为:平均工资=报告期实际支付的全部就业人员工资总额/报告期全部就业人员平均人数微信公众号“马克数据网”	32141	31609	36314	40389	46735	56579	62365	70016	77963	78402	77581	85338
650000	新疆	0	87.6277	43.793	就业人员和工资	文化、体育和娱乐业城镇单位就业人员平均工资	就业人员和工资-按行业分城镇单位就业人员平均工资-文化、体育和娱乐业城镇单位就业人员平均工资	元	平均工资指单位就业人员在一定时期内平均每人所得的货币工资额。它表明一定时期职工工资收入的高低程度，是反映就业人员工资水平的主要指标。计算公式为:平均工资=报告期实际支付的全部就业人员工资总额/报告期全部就业人员平均人数关注公众号“马 克 数 据 网”	32609	38062	45049	50951	52299	64906	71168	80821	79840	84009	89779	98245
320000	江苏	1	118.763	32.0617	就业人员和工资	文化、体育和娱乐业城镇单位就业人员平均工资	就业人员和工资-按行业分城镇单位就业人员平均工资-文化、体育和娱乐业城镇单位就业人员平均工资	元	平均工资指单位就业人员在一定时期内平均每人所得的货币工资额。它表明一定时期职工工资收入的高低程度，是反映就业人员工资水平的主要指标。计算公式为:平均工资=报告期实际支付的全部就业人员工资总额/报告期全部就业人员平均人数马 克 数 据 网	48360	52576	58582	63059	71787	77468	84242	91968	107119	108370	117081	123618
360000	江西	1	115.909	28.6757	就业人员和工资	文化、体育和娱乐业城镇单位就业人员平均工资	就业人员和工资-按行业分城镇单位就业人员平均工资-文化、体育和娱乐业城镇单位就业人员平均工资	元	平均工资指单位就业人员在一定时期内平均每人所得的货币工资额。它表明一定时期职工工资收入的高低程度，是反映就业人员工资水平的主要指标。计算公式为:平均工资=报告期实际支付的全部就业人员工资总额/报告期全部就业人员平均人数来源：百度搜索“马克数据网”	30555	32519	43512	44087	44941	53649	61272	64370	72367	80511	80903	85383
130000	河北	0	114.469	38.0371	就业人员和工资	文化、体育和娱乐业城镇单位就业人员平均工资	就业人员和工资-按行业分城镇单位就业人员平均工资-文化、体育和娱乐业城镇单位就业人员平均工资	元	平均工资指单位就业人员在一定时期内平均每人所得的货币工资额。它表明一定时期职工工资收入的高低程度，是反映就业人员工资水平的主要指标。计算公式为:平均工资=报告期实际支付的全部就业人员工资总额/报告期全部就业人员平均人数马 克 数 据 网	26208	30311	33453	36423	39789	45994	51507	58934	66123	71743	77217	78373
410000	河南	0	113.754	34.7655	就业人员和工资	文化、体育和娱乐业城镇单位就业人员平均工资	就业人员和工资-按行业分城镇单位就业人员平均工资-文化、体育和娱乐业城镇单位就业人员平均工资	元	平均工资指单位就业人员在一定时期内平均每人所得的货币工资额。它表明一定时期职工工资收入的高低程度，是反映就业人员工资水平的主要指标。计算公式为:平均工资=报告期实际支付的全部就业人员工资总额/报告期全部就业人员平均人数更多数据：www.macrodatas.cn	28511	31249	35925	36555	42426	47591	51908	58161	67815	73108	74843	75458
330000	浙江	1	120.153	30.2674	就业人员和工资	文化、体育和娱乐业城镇单位就业人员平均工资	就业人员和工资-按行业分城镇单位就业人员平均工资-文化、体育和娱乐业城镇单位就业人员平均工资	元	平均工资指单位就业人员在一定时期内平均每人所得的货币工资额。它表明一定时期职工工资收入的高低程度，是反映就业人员工资水平的主要指标。计算公式为:平均工资=报告期实际支付的全部就业人员工资总额/报告期全部就业人员平均人数更多数据：搜索“马克数据网”来源：www.macrodatas.cn	56313	61695	66915	73090	78311	87177	97257	109932	114343	116297	125984	138718
460000	海南	0	110.349	20.0174	就业人员和工资	文化、体育和娱乐业城镇单位就业人员平均工资	就业人员和工资-按行业分城镇单位就业人员平均工资-文化、体育和娱乐业城镇单位就业人员平均工资	元	平均工资指单位就业人员在一定时期内平均每人所得的货币工资额。它表明一定时期职工工资收入的高低程度，是反映就业人员工资水平的主要指标。计算公式为:平均工资=报告期实际支付的全部就业人员工资总额/报告期全部就业人员平均人数更多数据：www.macrodatas.cn	29492	34700	35410	43622	47717	56348	63699	67235	75795	79343	80492	86885
420000	湖北	1	114.342	30.5465	就业人员和工资	文化、体育和娱乐业城镇单位就业人员平均工资	就业人员和工资-按行业分城镇单位就业人员平均工资-文化、体育和娱乐业城镇单位就业人员平均工资	元	平均工资指单位就业人员在一定时期内平均每人所得的货币工资额。它表明一定时期职工工资收入的高低程度，是反映就业人员工资水平的主要指标。计算公式为:平均工资=报告期实际支付的全部就业人员工资总额/报告期全部就业人员平均人数马 克 数 据 网	32390	35310	37397	45201	51861	58510	61018	69129	79295	83183	88357	96538
430000	湖南	1	112.984	28.1124	就业人员和工资	文化、体育和娱乐业城镇单位就业人员平均工资	就业人员和工资-按行业分城镇单位就业人员平均工资-文化、体育和娱乐业城镇单位就业人员平均工资	元	平均工资指单位就业人员在一定时期内平均每人所得的货币工资额。它表明一定时期职工工资收入的高低程度，是反映就业人员工资水平的主要指标。计算公式为:平均工资=报告期实际支付的全部就业人员工资总额/报告期全部就业人员平均人数更多数据：www.macrodatas.cn	32908	38532	43448	48902	53924	62665	69158	76383	89668	98085	100019	111988
620000	甘肃	0	103.826	36.0594	就业人员和工资	文化、体育和娱乐业城镇单位就业人员平均工资	就业人员和工资-按行业分城镇单位就业人员平均工资-文化、体育和娱乐业城镇单位就业人员平均工资	元	平均工资指单位就业人员在一定时期内平均每人所得的货币工资额。它表明一定时期职工工资收入的高低程度，是反映就业人员工资水平的主要指标。计算公式为:平均工资=报告期实际支付的全部就业人员工资总额/报告期全部就业人员平均人数微信公众号“马克数据网”	28769	28503	35478	39989	46981	55246	58837	63705	69608	68623	71080	75521
350000	福建	0	119.295	26.1008	就业人员和工资	文化、体育和娱乐业城镇单位就业人员平均工资	就业人员和工资-按行业分城镇单位就业人员平均工资-文化、体育和娱乐业城镇单位就业人员平均工资	元	平均工资指单位就业人员在一定时期内平均每人所得的货币工资额。它表明一定时期职工工资收入的高低程度，是反映就业人员工资水平的主要指标。计算公式为:平均工资=报告期实际支付的全部就业人员工资总额/报告期全部就业人员平均人数来自马克数据网	35654	41715	47017	53391	57796	61039	67018	73532	82559	84160	93079	96891
540000	西藏	0	91.1172	29.6469	就业人员和工资	文化、体育和娱乐业城镇单位就业人员平均工资	就业人员和工资-按行业分城镇单位就业人员平均工资-文化、体育和娱乐业城镇单位就业人员平均工资	元	平均工资指单位就业人员在一定时期内平均每人所得的货币工资额。它表明一定时期职工工资收入的高低程度，是反映就业人员工资水平的主要指标。计算公式为:平均工资=报告期实际支付的全部就业人员工资总额/报告期全部就业人员平均人数马 克 数 据 网	50858	55133	57178	62046	67735	114097	117844	112333	108799	113757	108769	129745
520000	贵州	1	106.707	26.5982	就业人员和工资	文化、体育和娱乐业城镇单位就业人员平均工资	就业人员和工资-按行业分城镇单位就业人员平均工资-文化、体育和娱乐业城镇单位就业人员平均工资	元	平均工资指单位就业人员在一定时期内平均每人所得的货币工资额。它表明一定时期职工工资收入的高低程度，是反映就业人员工资水平的主要指标。计算公式为:平均工资=报告期实际支付的全部就业人员工资总额/报告期全部就业人员平均人数来自马克数据网	24531	29999	35937	43319	48944	57257	67427	75629	87154	86338	85191	86242
210000	辽宁	0	123.429	41.8354	就业人员和工资	文化、体育和娱乐业城镇单位就业人员平均工资	就业人员和工资-按行业分城镇单位就业人员平均工资-文化、体育和娱乐业城镇单位就业人员平均工资	元	平均工资指单位就业人员在一定时期内平均每人所得的货币工资额。它表明一定时期职工工资收入的高低程度，是反映就业人员工资水平的主要指标。计算公式为:平均工资=报告期实际支付的全部就业人员工资总额/报告期全部就业人员平均人数微信公众号“马克数据网”	36478	40272	43515	46818	46833	49918	52202	55137	65567	68134	87366	83719
500000	重庆	1	106.552	29.563	就业人员和工资	文化、体育和娱乐业城镇单位就业人员平均工资	就业人员和工资-按行业分城镇单位就业人员平均工资-文化、体育和娱乐业城镇单位就业人员平均工资	元	平均工资指单位就业人员在一定时期内平均每人所得的货币工资额。它表明一定时期职工工资收入的高低程度，是反映就业人员工资水平的主要指标。计算公式为:平均工资=报告期实际支付的全部就业人员工资总额/报告期全部就业人员平均人数马 克 数 据 网	34163	43786	46882	53723	59598	61544	65146	69873	79351	82344	86261	93912
610000	陕西	0	108.954	34.2655	就业人员和工资	文化、体育和娱乐业城镇单位就业人员平均工资	就业人员和工资-按行业分城镇单位就业人员平均工资-文化、体育和娱乐业城镇单位就业人员平均工资	元	平均工资指单位就业人员在一定时期内平均每人所得的货币工资额。它表明一定时期职工工资收入的高低程度，是反映就业人员工资水平的主要指标。计算公式为:平均工资=报告期实际支付的全部就业人员工资总额/报告期全部就业人员平均人数来源：马 克 数 据 网	29724	33425	38995	46364	47853	52918	55946	57597	60860	65406	68473	72929
630000	青海	0	101.78	36.6209	就业人员和工资	文化、体育和娱乐业城镇单位就业人员平均工资	就业人员和工资-按行业分城镇单位就业人员平均工资-文化、体育和娱乐业城镇单位就业人员平均工资	元	平均工资指单位就业人员在一定时期内平均每人所得的货币工资额。它表明一定时期职工工资收入的高低程度，是反映就业人员工资水平的主要指标。计算公式为:平均工资=报告期实际支付的全部就业人员工资总额/报告期全部就业人员平均人数微信公众号“马克数据网”	38694	42506	45084	49730	55759	59077	67319	78577	80991	78602	85283	88784
230000	黑龙江	0	126.662	45.7423	就业人员和工资	文化、体育和娱乐业城镇单位就业人员平均工资	就业人员和工资-按行业分城镇单位就业人员平均工资-文化、体育和娱乐业城镇单位就业人员平均工资	元	平均工资指单位就业人员在一定时期内平均每人所得的货币工资额。它表明一定时期职工工资收入的高低程度，是反映就业人员工资水平的主要指标。计算公式为:平均工资=报告期实际支付的全部就业人员工资总额/报告期全部就业人员平均人数来自马克数据网	29827	32918	36117	39644	43083	50931	55056	58391	62263	63598	64342	71787
310000	上海	1	121.474	31.2304	就业人员和工资	文化、体育和娱乐业城镇私营单位就业人员平均工资	就业人员和工资-按行业分城镇私营单位就业人员平均工资-文化、体育和娱乐业城镇私营单位就业人员平均工资	元	平均工资指单位就业人员在一定时期内平均每人所得的货币工资额。它表明一定时期职工工资收入的高低程度，是反映就业人员工资水平的主要指标。计算公式为:平均工资=报告期实际支付的全部就业人员工资总额/报告期全部就业人员平均人数微信公众号“马克 数据网”	20351	24795	26906	34377	36770	42029	48177	53770	58022	61619	81986	93524
530000	云南	1	102.71	25.0458	就业人员和工资	文化、体育和娱乐业城镇私营单位就业人员平均工资	就业人员和工资-按行业分城镇私营单位就业人员平均工资-文化、体育和娱乐业城镇私营单位就业人员平均工资	元	平均工资指单位就业人员在一定时期内平均每人所得的货币工资额。它表明一定时期职工工资收入的高低程度，是反映就业人员工资水平的主要指标。计算公式为:平均工资=报告期实际支付的全部就业人员工资总额/报告期全部就业人员平均人数来自：www.macrodatas.cn	15186	17307	11786	24519	29348	33397	33236	31747	34313	46555	39120	42462
150000	内蒙古	0	111.766	40.8175	就业人员和工资	文化、体育和娱乐业城镇私营单位就业人员平均工资	就业人员和工资-按行业分城镇私营单位就业人员平均工资-文化、体育和娱乐业城镇私营单位就业人员平均工资	元	平均工资指单位就业人员在一定时期内平均每人所得的货币工资额。它表明一定时期职工工资收入的高低程度，是反映就业人员工资水平的主要指标。计算公式为:平均工资=报告期实际支付的全部就业人员工资总额/报告期全部就业人员平均人数来自马克数据网	20407	22681	28495	27826	30669	31068	31807	30549	35832	34813	34835	39423
110000	北京	0	116.408	39.904	就业人员和工资	文化、体育和娱乐业城镇私营单位就业人员平均工资	就业人员和工资-按行业分城镇私营单位就业人员平均工资-文化、体育和娱乐业城镇私营单位就业人员平均工资	元	平均工资指单位就业人员在一定时期内平均每人所得的货币工资额。它表明一定时期职工工资收入的高低程度，是反映就业人员工资水平的主要指标。计算公式为:平均工资=报告期实际支付的全部就业人员工资总额/报告期全部就业人员平均人数更多数据：搜索“马克数据网”来源：www.macrodatas.cn	27188	31222	35961	52990	49915	49690	64250	69079	70601	87799	89806	93905
220000	吉林	0	125.326	43.8965	就业人员和工资	文化、体育和娱乐业城镇私营单位就业人员平均工资	就业人员和工资-按行业分城镇私营单位就业人员平均工资-文化、体育和娱乐业城镇私营单位就业人员平均工资	元	平均工资指单位就业人员在一定时期内平均每人所得的货币工资额。它表明一定时期职工工资收入的高低程度，是反映就业人员工资水平的主要指标。计算公式为:平均工资=报告期实际支付的全部就业人员工资总额/报告期全部就业人员平均人数关注微信公众号“马克数据网”	16293	17580	20126	21976	22813	24016	26079	28393	30818	33123	30995	40261
510000	四川	1	104.076	30.6517	就业人员和工资	文化、体育和娱乐业城镇私营单位就业人员平均工资	就业人员和工资-按行业分城镇私营单位就业人员平均工资-文化、体育和娱乐业城镇私营单位就业人员平均工资	元	平均工资指单位就业人员在一定时期内平均每人所得的货币工资额。它表明一定时期职工工资收入的高低程度，是反映就业人员工资水平的主要指标。计算公式为:平均工资=报告期实际支付的全部就业人员工资总额/报告期全部就业人员平均人数微信公众号“马克数据网”	16293	23169	25821	31131	33485	34103	36289	38730	40273	48821	44103	49186
120000	天津	0	117.201	39.0842	就业人员和工资	文化、体育和娱乐业城镇私营单位就业人员平均工资	就业人员和工资-按行业分城镇私营单位就业人员平均工资-文化、体育和娱乐业城镇私营单位就业人员平均工资	元	平均工资指单位就业人员在一定时期内平均每人所得的货币工资额。它表明一定时期职工工资收入的高低程度，是反映就业人员工资水平的主要指标。计算公式为:平均工资=报告期实际支付的全部就业人员工资总额/报告期全部就业人员平均人数来自：www.macrodatas.cn	21559	24716	29614	36413	40413	45666	51602	55824	58991	58002	57636	66054
640000	宁夏	0	106.259	38.4713	就业人员和工资	文化、体育和娱乐业城镇私营单位就业人员平均工资	就业人员和工资-按行业分城镇私营单位就业人员平均工资-文化、体育和娱乐业城镇私营单位就业人员平均工资	元	平均工资指单位就业人员在一定时期内平均每人所得的货币工资额。它表明一定时期职工工资收入的高低程度，是反映就业人员工资水平的主要指标。计算公式为:平均工资=报告期实际支付的全部就业人员工资总额/报告期全部就业人员平均人数百度搜索“马 克 数 据 网”	13568	23368	18183	24202	24796	28980	31258	32444	35359	37024	37573	43668
340000	安徽	1	117.285	31.8612	就业人员和工资	文化、体育和娱乐业城镇私营单位就业人员平均工资	就业人员和工资-按行业分城镇私营单位就业人员平均工资-文化、体育和娱乐业城镇私营单位就业人员平均工资	元	平均工资指单位就业人员在一定时期内平均每人所得的货币工资额。它表明一定时期职工工资收入的高低程度，是反映就业人员工资水平的主要指标。计算公式为:平均工资=报告期实际支付的全部就业人员工资总额/报告期全部就业人员平均人数搜索“马 克 数 据 网”	17709	18423	24269	27302	24599	30021	31223	37861	36344	43321	44752	48097
370000	山东	0	117.02	36.6685	就业人员和工资	文化、体育和娱乐业城镇私营单位就业人员平均工资	就业人员和工资-按行业分城镇私营单位就业人员平均工资-文化、体育和娱乐业城镇私营单位就业人员平均工资	元	平均工资指单位就业人员在一定时期内平均每人所得的货币工资额。它表明一定时期职工工资收入的高低程度，是反映就业人员工资水平的主要指标。计算公式为:平均工资=报告期实际支付的全部就业人员工资总额/报告期全部就业人员平均人数来源：马 克 数 据 网	20732	23885	27681	32012	36948	42204	45784	48460	52010	52679	53455	50325
140000	山西	0	112.562	37.8735	就业人员和工资	文化、体育和娱乐业城镇私营单位就业人员平均工资	就业人员和工资-按行业分城镇私营单位就业人员平均工资-文化、体育和娱乐业城镇私营单位就业人员平均工资	元	平均工资指单位就业人员在一定时期内平均每人所得的货币工资额。它表明一定时期职工工资收入的高低程度，是反映就业人员工资水平的主要指标。计算公式为:平均工资=报告期实际支付的全部就业人员工资总额/报告期全部就业人员平均人数微信公众号“马克数据网”	15445	15713	18629	19786	21787	24893	23396	26299	27389	23244	31191	33761
440000	广东	0	113.267	23.1322	就业人员和工资	文化、体育和娱乐业城镇私营单位就业人员平均工资	就业人员和工资-按行业分城镇私营单位就业人员平均工资-文化、体育和娱乐业城镇私营单位就业人员平均工资	元	平均工资指单位就业人员在一定时期内平均每人所得的货币工资额。它表明一定时期职工工资收入的高低程度，是反映就业人员工资水平的主要指标。计算公式为:平均工资=报告期实际支付的全部就业人员工资总额/报告期全部就业人员平均人数关注公众号“马 克 数 据 网”	23741	24826	28311	33023	40322	49836	47878	54540	61534	65462	54836	64159
450000	广西	0	108.328	22.8155	就业人员和工资	文化、体育和娱乐业城镇私营单位就业人员平均工资	就业人员和工资-按行业分城镇私营单位就业人员平均工资-文化、体育和娱乐业城镇私营单位就业人员平均工资	元	平均工资指单位就业人员在一定时期内平均每人所得的货币工资额。它表明一定时期职工工资收入的高低程度，是反映就业人员工资水平的主要指标。计算公式为:平均工资=报告期实际支付的全部就业人员工资总额/报告期全部就业人员平均人数百度搜索“马 克 数 据 网”	14538	16158	20601	20050	23086	27013	29305	31994	32223	35667	37337	40797
650000	新疆	0	87.6277	43.793	就业人员和工资	文化、体育和娱乐业城镇私营单位就业人员平均工资	就业人员和工资-按行业分城镇私营单位就业人员平均工资-文化、体育和娱乐业城镇私营单位就业人员平均工资	元	平均工资指单位就业人员在一定时期内平均每人所得的货币工资额。它表明一定时期职工工资收入的高低程度，是反映就业人员工资水平的主要指标。计算公式为:平均工资=报告期实际支付的全部就业人员工资总额/报告期全部就业人员平均人数更多数据：搜索“马克数据网”来源：www.macrodatas.cn	17101	20385	18168	22839	34479	35444	39310	42498	41101	41040	43639	52766
320000	江苏	1	118.763	32.0617	就业人员和工资	文化、体育和娱乐业城镇私营单位就业人员平均工资	就业人员和工资-按行业分城镇私营单位就业人员平均工资-文化、体育和娱乐业城镇私营单位就业人员平均工资	元	平均工资指单位就业人员在一定时期内平均每人所得的货币工资额。它表明一定时期职工工资收入的高低程度，是反映就业人员工资水平的主要指标。计算公式为:平均工资=报告期实际支付的全部就业人员工资总额/报告期全部就业人员平均人数马 克 数 据 网	23497	24560	29752	32744	36443	39839	43600	46356	51389	54362	59413	62836
360000	江西	1	115.909	28.6757	就业人员和工资	文化、体育和娱乐业城镇私营单位就业人员平均工资	就业人员和工资-按行业分城镇私营单位就业人员平均工资-文化、体育和娱乐业城镇私营单位就业人员平均工资	元	平均工资指单位就业人员在一定时期内平均每人所得的货币工资额。它表明一定时期职工工资收入的高低程度，是反映就业人员工资水平的主要指标。计算公式为:平均工资=报告期实际支付的全部就业人员工资总额/报告期全部就业人员平均人数来自：www.macrodatas.cn	17274	19797	21529	26600	25431	28038	32818	36511	41298	44446	42422	45092
130000	河北	0	114.469	38.0371	就业人员和工资	文化、体育和娱乐业城镇私营单位就业人员平均工资	就业人员和工资-按行业分城镇私营单位就业人员平均工资-文化、体育和娱乐业城镇私营单位就业人员平均工资	元	平均工资指单位就业人员在一定时期内平均每人所得的货币工资额。它表明一定时期职工工资收入的高低程度，是反映就业人员工资水平的主要指标。计算公式为:平均工资=报告期实际支付的全部就业人员工资总额/报告期全部就业人员平均人数搜索“马 克 数 据 网”	15855	18438	21939	23901	26507	30657	33065	34564	36965	41382	43875	43539
410000	河南	0	113.754	34.7655	就业人员和工资	文化、体育和娱乐业城镇私营单位就业人员平均工资	就业人员和工资-按行业分城镇私营单位就业人员平均工资-文化、体育和娱乐业城镇私营单位就业人员平均工资	元	平均工资指单位就业人员在一定时期内平均每人所得的货币工资额。它表明一定时期职工工资收入的高低程度，是反映就业人员工资水平的主要指标。计算公式为:平均工资=报告期实际支付的全部就业人员工资总额/报告期全部就业人员平均人数来自：www.macrodatas.cn	14560	16542	19982	22177	25405	26439	30192	30962	34377	39115	41995	42746
330000	浙江	1	120.153	30.2674	就业人员和工资	文化、体育和娱乐业城镇私营单位就业人员平均工资	就业人员和工资-按行业分城镇私营单位就业人员平均工资-文化、体育和娱乐业城镇私营单位就业人员平均工资	元	平均工资指单位就业人员在一定时期内平均每人所得的货币工资额。它表明一定时期职工工资收入的高低程度，是反映就业人员工资水平的主要指标。计算公式为:平均工资=报告期实际支付的全部就业人员工资总额/报告期全部就业人员平均人数来自：www.macrodatas.cn	20332	25900	29909	32170	31936	35165	39623	44535	49722	49924	51676	59943
460000	海南	0	110.349	20.0174	就业人员和工资	文化、体育和娱乐业城镇私营单位就业人员平均工资	就业人员和工资-按行业分城镇私营单位就业人员平均工资-文化、体育和娱乐业城镇私营单位就业人员平均工资	元	平均工资指单位就业人员在一定时期内平均每人所得的货币工资额。它表明一定时期职工工资收入的高低程度，是反映就业人员工资水平的主要指标。计算公式为:平均工资=报告期实际支付的全部就业人员工资总额/报告期全部就业人员平均人数微信公众号“马克 数据网”	16162	20044	19775	23804	26738	28559	34852	35683	47000	57187	48242	92466
420000	湖北	1	114.342	30.5465	就业人员和工资	文化、体育和娱乐业城镇私营单位就业人员平均工资	就业人员和工资-按行业分城镇私营单位就业人员平均工资-文化、体育和娱乐业城镇私营单位就业人员平均工资	元	平均工资指单位就业人员在一定时期内平均每人所得的货币工资额。它表明一定时期职工工资收入的高低程度，是反映就业人员工资水平的主要指标。计算公式为:平均工资=报告期实际支付的全部就业人员工资总额/报告期全部就业人员平均人数来自马克数据网	16711	19628	22016	23887	24795	27778	29014	31556	34307	38545	46427	52808
430000	湖南	1	112.984	28.1124	就业人员和工资	文化、体育和娱乐业城镇私营单位就业人员平均工资	就业人员和工资-按行业分城镇私营单位就业人员平均工资-文化、体育和娱乐业城镇私营单位就业人员平均工资	元	平均工资指单位就业人员在一定时期内平均每人所得的货币工资额。它表明一定时期职工工资收入的高低程度，是反映就业人员工资水平的主要指标。计算公式为:平均工资=报告期实际支付的全部就业人员工资总额/报告期全部就业人员平均人数搜索“马 克 数 据 网”	17243	19564	20565	24419	24903	27725	30715	31066	33523	40503	46038	49682
620000	甘肃	0	103.826	36.0594	就业人员和工资	文化、体育和娱乐业城镇私营单位就业人员平均工资	就业人员和工资-按行业分城镇私营单位就业人员平均工资-文化、体育和娱乐业城镇私营单位就业人员平均工资	元	平均工资指单位就业人员在一定时期内平均每人所得的货币工资额。它表明一定时期职工工资收入的高低程度，是反映就业人员工资水平的主要指标。计算公式为:平均工资=报告期实际支付的全部就业人员工资总额/报告期全部就业人员平均人数来自马克数据网	15364	16193	17270	19808	20419	26491	33723	35592	34905	36419	36888	40309
350000	福建	0	119.295	26.1008	就业人员和工资	文化、体育和娱乐业城镇私营单位就业人员平均工资	就业人员和工资-按行业分城镇私营单位就业人员平均工资-文化、体育和娱乐业城镇私营单位就业人员平均工资	元	平均工资指单位就业人员在一定时期内平均每人所得的货币工资额。它表明一定时期职工工资收入的高低程度，是反映就业人员工资水平的主要指标。计算公式为:平均工资=报告期实际支付的全部就业人员工资总额/报告期全部就业人员平均人数关注公众号“马 克 数 据 网”	19582	21956	30545	36042	34014	31468	34641	34232	38296	42862	44934	49984
540000	西藏	0	91.1172	29.6469	就业人员和工资	文化、体育和娱乐业城镇私营单位就业人员平均工资	就业人员和工资-按行业分城镇私营单位就业人员平均工资-文化、体育和娱乐业城镇私营单位就业人员平均工资	元	平均工资指单位就业人员在一定时期内平均每人所得的货币工资额。它表明一定时期职工工资收入的高低程度，是反映就业人员工资水平的主要指标。计算公式为:平均工资=报告期实际支付的全部就业人员工资总额/报告期全部就业人员平均人数微信公众号“马克数据网”											57603	63557
520000	贵州	1	106.707	26.5982	就业人员和工资	文化、体育和娱乐业城镇私营单位就业人员平均工资	就业人员和工资-按行业分城镇私营单位就业人员平均工资-文化、体育和娱乐业城镇私营单位就业人员平均工资	元	平均工资指单位就业人员在一定时期内平均每人所得的货币工资额。它表明一定时期职工工资收入的高低程度，是反映就业人员工资水平的主要指标。计算公式为:平均工资=报告期实际支付的全部就业人员工资总额/报告期全部就业人员平均人数更多数据：www.macrodatas.cn	12010	14255	17100	20643	23728	27813	31491	34121	35720	36514	41040	46069
210000	辽宁	0	123.429	41.8354	就业人员和工资	文化、体育和娱乐业城镇私营单位就业人员平均工资	就业人员和工资-按行业分城镇私营单位就业人员平均工资-文化、体育和娱乐业城镇私营单位就业人员平均工资	元	平均工资指单位就业人员在一定时期内平均每人所得的货币工资额。它表明一定时期职工工资收入的高低程度，是反映就业人员工资水平的主要指标。计算公式为:平均工资=报告期实际支付的全部就业人员工资总额/报告期全部就业人员平均人数马 克 数 据 网	20363	23931	25503	26765	27238	30660	29453	32444	34072	37557	37708	39376
500000	重庆	1	106.552	29.563	就业人员和工资	文化、体育和娱乐业城镇私营单位就业人员平均工资	就业人员和工资-按行业分城镇私营单位就业人员平均工资-文化、体育和娱乐业城镇私营单位就业人员平均工资	元	平均工资指单位就业人员在一定时期内平均每人所得的货币工资额。它表明一定时期职工工资收入的高低程度，是反映就业人员工资水平的主要指标。计算公式为:平均工资=报告期实际支付的全部就业人员工资总额/报告期全部就业人员平均人数百度搜索“马 克 数 据 网”	18900	22117	31373	36085	39946	42064	44979	47814	49472	50542	47678	50926
610000	陕西	0	108.954	34.2655	就业人员和工资	文化、体育和娱乐业城镇私营单位就业人员平均工资	就业人员和工资-按行业分城镇私营单位就业人员平均工资-文化、体育和娱乐业城镇私营单位就业人员平均工资	元	平均工资指单位就业人员在一定时期内平均每人所得的货币工资额。它表明一定时期职工工资收入的高低程度，是反映就业人员工资水平的主要指标。计算公式为:平均工资=报告期实际支付的全部就业人员工资总额/报告期全部就业人员平均人数来源：百度搜索“马克数据网”	17719	19358	23631	24069	25549	28439	29999	31957	34424	37815	40147	44631
630000	青海	0	101.78	36.6209	就业人员和工资	文化、体育和娱乐业城镇私营单位就业人员平均工资	就业人员和工资-按行业分城镇私营单位就业人员平均工资-文化、体育和娱乐业城镇私营单位就业人员平均工资	元	平均工资指单位就业人员在一定时期内平均每人所得的货币工资额。它表明一定时期职工工资收入的高低程度，是反映就业人员工资水平的主要指标。计算公式为:平均工资=报告期实际支付的全部就业人员工资总额/报告期全部就业人员平均人数微信公众号“马克 数据网”	12377	14116	20627	28538	30022	31282	39689	40956	43044	50160	39187	43020
230000	黑龙江	0	126.662	45.7423	就业人员和工资	文化、体育和娱乐业城镇私营单位就业人员平均工资	就业人员和工资-按行业分城镇私营单位就业人员平均工资-文化、体育和娱乐业城镇私营单位就业人员平均工资	元	平均工资指单位就业人员在一定时期内平均每人所得的货币工资额。它表明一定时期职工工资收入的高低程度，是反映就业人员工资水平的主要指标。计算公式为:平均工资=报告期实际支付的全部就业人员工资总额/报告期全部就业人员平均人数搜索“马 克 数 据 网”	13993	15580	16878	19033	23344	23913	25032	26825	29379	33856	35035	41714
310000	上海	1	121.474	31.2304	财政	地方财政文化体育与传媒支出	财政-地方财政支出-地方财政文化体育与传媒支出	亿元	文化体育与传媒支出反映政府在文化、文物、体育、广播电视、新闻出版等方面的支出。马 克 数 据 网	54.95	68.8	72.51	89.17	86.38	108.22	113.34	191.32	186.52	179.87	161.26	156.42
530000	云南	1	102.71	25.0458	财政	地方财政文化体育与传媒支出	财政-地方财政支出-地方财政文化体育与传媒支出	亿元	文化体育与传媒支出反映政府在文化、文物、体育、广播电视、新闻出版等方面的支出。来源：百度“马 克 数据网”	35.53	45.34	62.06	61.35	56.21	61.66	77.93	71.3	72.2	77.9	93.08	77.57
150000	内蒙古	0	111.766	40.8175	财政	地方财政文化体育与传媒支出	财政-地方财政支出-地方财政文化体育与传媒支出	亿元	文化体育与传媒支出反映政府在文化、文物、体育、广播电视、新闻出版等方面的支出。更多数据：www.macrodatas.cn	52.96	68.78	87.21	88.05	91.9	95.81	89.25	116.79	109.27	119.34	123.64	107.33
110000	北京	0	116.408	39.904	财政	地方财政文化体育与传媒支出	财政-地方财政支出-地方财政文化体育与传媒支出	亿元	文化体育与传媒支出反映政府在文化、文物、体育、广播电视、新闻出版等方面的支出。马 克 数 据 网	79.36	87.01	141.37	154.71	163.9	188.5	198.35	208.96	245.43	279.32	225.11	220.06
220000	吉林	0	125.326	43.8965	财政	地方财政文化体育与传媒支出	财政-地方财政支出-地方财政文化体育与传媒支出	亿元	文化体育与传媒支出反映政府在文化、文物、体育、广播电视、新闻出版等方面的支出。搜索“马 克 数 据 网”	32.93	44.25	47.48	56.55	61.16	73.01	72.03	70.69	70.24	71.75	71.92	61.08
510000	四川	1	104.076	30.6517	财政	地方财政文化体育与传媒支出	财政-地方财政支出-地方财政文化体育与传媒支出	亿元	文化体育与传媒支出反映政府在文化、文物、体育、广播电视、新闻出版等方面的支出。来源：百度搜索“马克数据网”	59.37	87.35	120.7	142.4	135.65	139.41	145.2	142.46	154.91	196.48	229.27	210.47
120000	天津	0	117.201	39.0842	财政	地方财政文化体育与传媒支出	财政-地方财政支出-地方财政文化体育与传媒支出	亿元	文化体育与传媒支出反映政府在文化、文物、体育、广播电视、新闻出版等方面的支出。更多数据：搜索“马克数据网”来源：www.macrodatas.cn	24.28	29.76	35.85	44.53	47.87	51.73	57.16	57.94	52.92	46.41	34.01	36.97
640000	宁夏	0	106.259	38.4713	财政	地方财政文化体育与传媒支出	财政-地方财政支出-地方财政文化体育与传媒支出	亿元	文化体育与传媒支出反映政府在文化、文物、体育、广播电视、新闻出版等方面的支出。关注公众号“马克数据网”	16.09	13.94	14.44	16.6	16.02	20.97	25.23	22.82	23.33	25.85	29.43	24.39
340000	安徽	1	117.285	31.8612	财政	地方财政文化体育与传媒支出	财政-地方财政支出-地方财政文化体育与传媒支出	亿元	文化体育与传媒支出反映政府在文化、文物、体育、广播电视、新闻出版等方面的支出。更多数据：搜索“马克数据网”来源：www.macrodatas.cn	51.68	62.35	71.43	79.5	82.25	88.19	84.23	80.94	79.77	87.98	97.06	86.1
370000	山东	0	117.02	36.6685	财政	地方财政文化体育与传媒支出	财政-地方财政支出-地方财政文化体育与传媒支出	亿元	文化体育与传媒支出反映政府在文化、文物、体育、广播电视、新闻出版等方面的支出。来源：百度搜索“马克数据网”	74.03	91.57	114.27	127.53	127.75	137.26	137.47	141.9	153.52	189.5	170.11	180.36
140000	山西	0	112.562	37.8735	财政	地方财政文化体育与传媒支出	财政-地方财政支出-地方财政文化体育与传媒支出	亿元	文化体育与传媒支出反映政府在文化、文物、体育、广播电视、新闻出版等方面的支出。来源：百度“马 克 数据网”	31.24	48.17	60.2	66.69	63.95	73.08	72.64	71.92	92.85	112.24	112.31	97.04
440000	广东	0	113.267	23.1322	财政	地方财政文化体育与传媒支出	财政-地方财政支出-地方财政文化体育与传媒支出	亿元	文化体育与传媒支出反映政府在文化、文物、体育、广播电视、新闻出版等方面的支出。来自：www.macrodatas.cn	166.16	170.56	137.64	141.68	168.16	194.58	229.71	285.87	321.84	350.33	417.22	395.59
450000	广西	0	108.328	22.8155	财政	地方财政文化体育与传媒支出	财政-地方财政支出-地方财政文化体育与传媒支出	亿元	文化体育与传媒支出反映政府在文化、文物、体育、广播电视、新闻出版等方面的支出。微信公众号“马克 数据网”	32.77	37.48	45.52	49.85	68.52	79	71.08	64.36	63.59	76.33	109.49	88.51
650000	新疆	0	87.6277	43.793	财政	地方财政文化体育与传媒支出	财政-地方财政支出-地方财政文化体育与传媒支出	亿元	文化体育与传媒支出反映政府在文化、文物、体育、广播电视、新闻出版等方面的支出。来自马克数据网	33.92	47.7	68.23	74.63	74.32	78.96	77.61	80.4	73.39	92.14	82.5	87.44
320000	江苏	1	118.763	32.0617	财政	地方财政文化体育与传媒支出	财政-地方财政支出-地方财政文化体育与传媒支出	亿元	文化体育与传媒支出反映政府在文化、文物、体育、广播电视、新闻出版等方面的支出。关注公众号“马 克 数 据 网”	88.67	116.86	150.9	173.54	190.86	196.06	193.28	194.37	197.22	264.53	311.68	271.01
360000	江西	1	115.909	28.6757	财政	地方财政文化体育与传媒支出	财政-地方财政支出-地方财政文化体育与传媒支出	亿元	文化体育与传媒支出反映政府在文化、文物、体育、广播电视、新闻出版等方面的支出。更多数据：搜索“马克数据网”来源：www.macrodatas.cn	28.38	39.66	44.77	52.62	60.03	68.9	70.49	74.65	79.1	87.6	120.35	117.32
130000	河北	0	114.469	38.0371	财政	地方财政文化体育与传媒支出	财政-地方财政支出-地方财政文化体育与传媒支出	亿元	文化体育与传媒支出反映政府在文化、文物、体育、广播电视、新闻出版等方面的支出。更多数据：www.macrodatas.cn	37.09	50.45	59.29	72.71	82.66	88.34	87.54	103.19	115.17	158	163.73	127.08
410000	河南	0	113.754	34.7655	财政	地方财政文化体育与传媒支出	财政-地方财政支出-地方财政文化体育与传媒支出	亿元	文化体育与传媒支出反映政府在文化、文物、体育、广播电视、新闻出版等方面的支出。来源：百度搜索“马克数据网”	54.99	57.54	69.63	80.78	91.16	105.38	97.33	97.52	103.04	127.87	140.93	122.01
330000	浙江	1	120.153	30.2674	财政	地方财政文化体育与传媒支出	财政-地方财政支出-地方财政文化体育与传媒支出	亿元	文化体育与传媒支出反映政府在文化、文物、体育、广播电视、新闻出版等方面的支出。来源：百度“马 克 数据网”	77.15	85.09	94.18	106	115.36	165.38	158.72	159.66	174.59	203.26	229.62	249.35
460000	海南	0	110.349	20.0174	财政	地方财政文化体育与传媒支出	财政-地方财政支出-地方财政文化体育与传媒支出	亿元	文化体育与传媒支出反映政府在文化、文物、体育、广播电视、新闻出版等方面的支出。百度搜索“马 克 数 据 网”	11.61	16.6	19.85	21.9	23.51	25.48	26.9	29.86	47.37	56.34	53.22	37.74
420000	湖北	1	114.342	30.5465	财政	地方财政文化体育与传媒支出	财政-地方财政支出-地方财政文化体育与传媒支出	亿元	文化体育与传媒支出反映政府在文化、文物、体育、广播电视、新闻出版等方面的支出。来自：www.macrodatas.cn	36.67	47.09	62.47	72.44	76.65	84.03	96.61	95.26	113.15	148.53	146.52	131.37
430000	湖南	1	112.984	28.1124	财政	地方财政文化体育与传媒支出	财政-地方财政支出-地方财政文化体育与传媒支出	亿元	文化体育与传媒支出反映政府在文化、文物、体育、广播电视、新闻出版等方面的支出。关注微信公众号“马克数据网”	39.66	44.87	54.5	68.95	80.01	111.74	140.68	148.83	134.54	144.83	139.87	134.98
620000	甘肃	0	103.826	36.0594	财政	地方财政文化体育与传媒支出	财政-地方财政支出-地方财政文化体育与传媒支出	亿元	文化体育与传媒支出反映政府在文化、文物、体育、广播电视、新闻出版等方面的支出。关注微信公众号“马克数据网”	29.78	33.07	49.87	59.76	49.6	62.76	63.84	64.59	72.52	84.85	88.43	82.71
350000	福建	0	119.295	26.1008	财政	地方财政文化体育与传媒支出	财政-地方财政支出-地方财政文化体育与传媒支出	亿元	文化体育与传媒支出反映政府在文化、文物、体育、广播电视、新闻出版等方面的支出。来源：百度“马 克 数据网”	27.1	35.86	46.07	57.88	64.18	84.82	81.26	87.34	84.73	104	112.88	104.82
540000	西藏	0	91.1172	29.6469	财政	地方财政文化体育与传媒支出	财政-地方财政支出-地方财政文化体育与传媒支出	亿元	文化体育与传媒支出反映政府在文化、文物、体育、广播电视、新闻出版等方面的支出。来源：百度“马 克 数据网”	12.48	18.91	24.18	22.51	34.1	34.73	34.85	44.93	46.02	57.55	59.43	46.56
520000	贵州	1	106.707	26.5982	财政	地方财政文化体育与传媒支出	财政-地方财政支出-地方财政文化体育与传媒支出	亿元	文化体育与传媒支出反映政府在文化、文物、体育、广播电视、新闻出版等方面的支出。更多数据：www.macrodatas.cn	23.98	35.31	49.85	48.68	54.69	61.2	67.34	64.73	60.8	68.76	72.76	117.08
210000	辽宁	0	123.429	41.8354	财政	地方财政文化体育与传媒支出	财政-地方财政支出-地方财政文化体育与传媒支出	亿元	文化体育与传媒支出反映政府在文化、文物、体育、广播电视、新闻出版等方面的支出。来自马克数据网	56.76	68.6	79.25	95.34	92.6	88.59	84.7	86.44	71.59	85.98	89.73	84.36
500000	重庆	1	106.552	29.563	财政	地方财政文化体育与传媒支出	财政-地方财政支出-地方财政文化体育与传媒支出	亿元	文化体育与传媒支出反映政府在文化、文物、体育、广播电视、新闻出版等方面的支出。来自：www.macrodatas.cn	24.04	31.16	33.08	34.94	36.02	47.01	47.98	48.89	49.31	55.24	64.89	64.23
610000	陕西	0	108.954	34.2655	财政	地方财政文化体育与传媒支出	财政-地方财政支出-地方财政文化体育与传媒支出	亿元	文化体育与传媒支出反映政府在文化、文物、体育、广播电视、新闻出版等方面的支出。搜索“马 克 数 据 网”	47.86	61.27	91.81	100.44	93.23	103.09	125.85	121.95	126.11	127.58	140.57	161.76
630000	青海	0	101.78	36.6209	财政	地方财政文化体育与传媒支出	财政-地方财政支出-地方财政文化体育与传媒支出	亿元	文化体育与传媒支出反映政府在文化、文物、体育、广播电视、新闻出版等方面的支出。搜索“马 克 数 据 网”	11.57	14.32	18.92	25.84	34.16	33.6	33.32	37.58	35.49	42.39	45.93	36.99
230000	黑龙江	0	126.662	45.7423	财政	地方财政文化体育与传媒支出	财政-地方财政支出-地方财政文化体育与传媒支出	亿元	文化体育与传媒支出反映政府在文化、文物、体育、广播电视、新闻出版等方面的支出。马 克 数 据 网	39.5	44.94	47.27	52.37	45.63	53.17	53.21	53.56	46.2	54.7	58.37	55.42
310000	上海	1	121.474	31.2304	价格指数	文化办公用品类商品零售价格指数(上年=100)	价格指数-商品零售价格分类指数(上年=100)-文化办公用品类商品零售价格指数(上年=100)		文化办公用品包括学习和办公用的纸张、文具、计算机及其配件、打印机及配件、复印机、扫描仪、油印机、速印机、电子辞典、计算器、印刷材料以及教学用的设备、普通测绘仪器、器材、标本、模型等，不包括通讯器材。计算机及其配套产品包括大、中、小、微型、台式和手提式电子计算机、掌上电脑和计算机的辅助设备，如不间断电源、多媒体配件以及专用设备、零配件，计算机用光盘、磁盘、磁带等，不包括单板机、插卡式电脑学习机和各种电子计算机软件。打印机及配件包括各种打印机（针式、喷墨、激光）以及相关的打印机用纸、色带、硒鼓等。来源：马 克 数 据 网	97.7	94.7	94.1	94.9	98.2	99.2	103.2	100.1	100.4	97.8	101.4	101.6
530000	云南	1	102.71	25.0458	价格指数	文化办公用品类商品零售价格指数(上年=100)	价格指数-商品零售价格分类指数(上年=100)-文化办公用品类商品零售价格指数(上年=100)		文化办公用品包括学习和办公用的纸张、文具、计算机及其配件、打印机及配件、复印机、扫描仪、油印机、速印机、电子辞典、计算器、印刷材料以及教学用的设备、普通测绘仪器、器材、标本、模型等，不包括通讯器材。计算机及其配套产品包括大、中、小、微型、台式和手提式电子计算机、掌上电脑和计算机的辅助设备，如不间断电源、多媒体配件以及专用设备、零配件，计算机用光盘、磁盘、磁带等，不包括单板机、插卡式电脑学习机和各种电子计算机软件。打印机及配件包括各种打印机（针式、喷墨、激光）以及相关的打印机用纸、色带、硒鼓等。关注公众号“马 克 数 据 网”	99.5	98.4	97.9	100.3	99.5	99.5	98.9	100.3	101.6	100.1	99.1	101.7
150000	内蒙古	0	111.766	40.8175	价格指数	文化办公用品类商品零售价格指数(上年=100)	价格指数-商品零售价格分类指数(上年=100)-文化办公用品类商品零售价格指数(上年=100)		文化办公用品包括学习和办公用的纸张、文具、计算机及其配件、打印机及配件、复印机、扫描仪、油印机、速印机、电子辞典、计算器、印刷材料以及教学用的设备、普通测绘仪器、器材、标本、模型等，不包括通讯器材。计算机及其配套产品包括大、中、小、微型、台式和手提式电子计算机、掌上电脑和计算机的辅助设备，如不间断电源、多媒体配件以及专用设备、零配件，计算机用光盘、磁盘、磁带等，不包括单板机、插卡式电脑学习机和各种电子计算机软件。打印机及配件包括各种打印机（针式、喷墨、激光）以及相关的打印机用纸、色带、硒鼓等。来源：马 克 数 据 网	98.1	97.1	98.2	98.9	98.2	100.7	101.1	101	101	100.3	99.9	100
110000	北京	0	116.408	39.904	价格指数	文化办公用品类商品零售价格指数(上年=100)	价格指数-商品零售价格分类指数(上年=100)-文化办公用品类商品零售价格指数(上年=100)		文化办公用品包括学习和办公用的纸张、文具、计算机及其配件、打印机及配件、复印机、扫描仪、油印机、速印机、电子辞典、计算器、印刷材料以及教学用的设备、普通测绘仪器、器材、标本、模型等，不包括通讯器材。计算机及其配套产品包括大、中、小、微型、台式和手提式电子计算机、掌上电脑和计算机的辅助设备，如不间断电源、多媒体配件以及专用设备、零配件，计算机用光盘、磁盘、磁带等，不包括单板机、插卡式电脑学习机和各种电子计算机软件。打印机及配件包括各种打印机（针式、喷墨、激光）以及相关的打印机用纸、色带、硒鼓等。关注公众号“马 克 数 据 网”	92.6	93	95.7	95.6	93.6	98.3	95.1	96.7	98.5	98.3	99.8	104.1
220000	吉林	0	125.326	43.8965	价格指数	文化办公用品类商品零售价格指数(上年=100)	价格指数-商品零售价格分类指数(上年=100)-文化办公用品类商品零售价格指数(上年=100)		文化办公用品包括学习和办公用的纸张、文具、计算机及其配件、打印机及配件、复印机、扫描仪、油印机、速印机、电子辞典、计算器、印刷材料以及教学用的设备、普通测绘仪器、器材、标本、模型等，不包括通讯器材。计算机及其配套产品包括大、中、小、微型、台式和手提式电子计算机、掌上电脑和计算机的辅助设备，如不间断电源、多媒体配件以及专用设备、零配件，计算机用光盘、磁盘、磁带等，不包括单板机、插卡式电脑学习机和各种电子计算机软件。打印机及配件包括各种打印机（针式、喷墨、激光）以及相关的打印机用纸、色带、硒鼓等。关注微信公众号“马克数据网”	100.3	101.1	98.7	98.9	98.9	99.6	98.5	101.5	101.3	99.6	100.8	101.5
510000	四川	1	104.076	30.6517	价格指数	文化办公用品类商品零售价格指数(上年=100)	价格指数-商品零售价格分类指数(上年=100)-文化办公用品类商品零售价格指数(上年=100)		文化办公用品包括学习和办公用的纸张、文具、计算机及其配件、打印机及配件、复印机、扫描仪、油印机、速印机、电子辞典、计算器、印刷材料以及教学用的设备、普通测绘仪器、器材、标本、模型等，不包括通讯器材。计算机及其配套产品包括大、中、小、微型、台式和手提式电子计算机、掌上电脑和计算机的辅助设备，如不间断电源、多媒体配件以及专用设备、零配件，计算机用光盘、磁盘、磁带等，不包括单板机、插卡式电脑学习机和各种电子计算机软件。打印机及配件包括各种打印机（针式、喷墨、激光）以及相关的打印机用纸、色带、硒鼓等。来源：马 克 数 据 网	98.5	96.5	96.8	98.2	97.4	98.8	96.2	94.7	99.4	99.2	98.9	103.3
120000	天津	0	117.201	39.0842	价格指数	文化办公用品类商品零售价格指数(上年=100)	价格指数-商品零售价格分类指数(上年=100)-文化办公用品类商品零售价格指数(上年=100)		文化办公用品包括学习和办公用的纸张、文具、计算机及其配件、打印机及配件、复印机、扫描仪、油印机、速印机、电子辞典、计算器、印刷材料以及教学用的设备、普通测绘仪器、器材、标本、模型等，不包括通讯器材。计算机及其配套产品包括大、中、小、微型、台式和手提式电子计算机、掌上电脑和计算机的辅助设备，如不间断电源、多媒体配件以及专用设备、零配件，计算机用光盘、磁盘、磁带等，不包括单板机、插卡式电脑学习机和各种电子计算机软件。打印机及配件包括各种打印机（针式、喷墨、激光）以及相关的打印机用纸、色带、硒鼓等。关注公众号“马克数据网”	90.8	90.5	94.6	97.7	96.4	97.2	100.3	99.5	98.9	100.8	100.4	102.4
640000	宁夏	0	106.259	38.4713	价格指数	文化办公用品类商品零售价格指数(上年=100)	价格指数-商品零售价格分类指数(上年=100)-文化办公用品类商品零售价格指数(上年=100)		文化办公用品包括学习和办公用的纸张、文具、计算机及其配件、打印机及配件、复印机、扫描仪、油印机、速印机、电子辞典、计算器、印刷材料以及教学用的设备、普通测绘仪器、器材、标本、模型等，不包括通讯器材。计算机及其配套产品包括大、中、小、微型、台式和手提式电子计算机、掌上电脑和计算机的辅助设备，如不间断电源、多媒体配件以及专用设备、零配件，计算机用光盘、磁盘、磁带等，不包括单板机、插卡式电脑学习机和各种电子计算机软件。打印机及配件包括各种打印机（针式、喷墨、激光）以及相关的打印机用纸、色带、硒鼓等。来源：马 克 数 据 网	94.8	98	96.4	98.7	96.1	98.9	99.5	101.3	100.4	99.3	101.3	102.9
340000	安徽	1	117.285	31.8612	价格指数	文化办公用品类商品零售价格指数(上年=100)	价格指数-商品零售价格分类指数(上年=100)-文化办公用品类商品零售价格指数(上年=100)		文化办公用品包括学习和办公用的纸张、文具、计算机及其配件、打印机及配件、复印机、扫描仪、油印机、速印机、电子辞典、计算器、印刷材料以及教学用的设备、普通测绘仪器、器材、标本、模型等，不包括通讯器材。计算机及其配套产品包括大、中、小、微型、台式和手提式电子计算机、掌上电脑和计算机的辅助设备，如不间断电源、多媒体配件以及专用设备、零配件，计算机用光盘、磁盘、磁带等，不包括单板机、插卡式电脑学习机和各种电子计算机软件。打印机及配件包括各种打印机（针式、喷墨、激光）以及相关的打印机用纸、色带、硒鼓等。关注微信公众号“马克数据网”	99.1	98.4	99.4	99.6	99	99.1	98.8	102.3	99.1	98.6	99	100.3
370000	山东	0	117.02	36.6685	价格指数	文化办公用品类商品零售价格指数(上年=100)	价格指数-商品零售价格分类指数(上年=100)-文化办公用品类商品零售价格指数(上年=100)		文化办公用品包括学习和办公用的纸张、文具、计算机及其配件、打印机及配件、复印机、扫描仪、油印机、速印机、电子辞典、计算器、印刷材料以及教学用的设备、普通测绘仪器、器材、标本、模型等，不包括通讯器材。计算机及其配套产品包括大、中、小、微型、台式和手提式电子计算机、掌上电脑和计算机的辅助设备，如不间断电源、多媒体配件以及专用设备、零配件，计算机用光盘、磁盘、磁带等，不包括单板机、插卡式电脑学习机和各种电子计算机软件。打印机及配件包括各种打印机（针式、喷墨、激光）以及相关的打印机用纸、色带、硒鼓等。微信公众号“马克数据网”	98.5	99.1	98.6	98.9	99.3	99.9	98.8	100.6	101.2	100.3	100.2	100.6
140000	山西	0	112.562	37.8735	价格指数	文化办公用品类商品零售价格指数(上年=100)	价格指数-商品零售价格分类指数(上年=100)-文化办公用品类商品零售价格指数(上年=100)		文化办公用品包括学习和办公用的纸张、文具、计算机及其配件、打印机及配件、复印机、扫描仪、油印机、速印机、电子辞典、计算器、印刷材料以及教学用的设备、普通测绘仪器、器材、标本、模型等，不包括通讯器材。计算机及其配套产品包括大、中、小、微型、台式和手提式电子计算机、掌上电脑和计算机的辅助设备，如不间断电源、多媒体配件以及专用设备、零配件，计算机用光盘、磁盘、磁带等，不包括单板机、插卡式电脑学习机和各种电子计算机软件。打印机及配件包括各种打印机（针式、喷墨、激光）以及相关的打印机用纸、色带、硒鼓等。来源：百度“马 克 数据网”	97.7	96.5	98	98	98.4	99.2	98.9	100.1	99.9	100	101.1	101.1
440000	广东	0	113.267	23.1322	价格指数	文化办公用品类商品零售价格指数(上年=100)	价格指数-商品零售价格分类指数(上年=100)-文化办公用品类商品零售价格指数(上年=100)		文化办公用品包括学习和办公用的纸张、文具、计算机及其配件、打印机及配件、复印机、扫描仪、油印机、速印机、电子辞典、计算器、印刷材料以及教学用的设备、普通测绘仪器、器材、标本、模型等，不包括通讯器材。计算机及其配套产品包括大、中、小、微型、台式和手提式电子计算机、掌上电脑和计算机的辅助设备，如不间断电源、多媒体配件以及专用设备、零配件，计算机用光盘、磁盘、磁带等，不包括单板机、插卡式电脑学习机和各种电子计算机软件。打印机及配件包括各种打印机（针式、喷墨、激光）以及相关的打印机用纸、色带、硒鼓等。更多数据：www.macrodatas.cn	98.4	99	99.4	99.3	99.2	98.5	97.8	98.2	98.3	97.8	99.2	101.3
450000	广西	0	108.328	22.8155	价格指数	文化办公用品类商品零售价格指数(上年=100)	价格指数-商品零售价格分类指数(上年=100)-文化办公用品类商品零售价格指数(上年=100)		文化办公用品包括学习和办公用的纸张、文具、计算机及其配件、打印机及配件、复印机、扫描仪、油印机、速印机、电子辞典、计算器、印刷材料以及教学用的设备、普通测绘仪器、器材、标本、模型等，不包括通讯器材。计算机及其配套产品包括大、中、小、微型、台式和手提式电子计算机、掌上电脑和计算机的辅助设备，如不间断电源、多媒体配件以及专用设备、零配件，计算机用光盘、磁盘、磁带等，不包括单板机、插卡式电脑学习机和各种电子计算机软件。打印机及配件包括各种打印机（针式、喷墨、激光）以及相关的打印机用纸、色带、硒鼓等。关注公众号“马克数据网”	98.9	98.9	99	98.6	99.8	99.6	99.8	99.9	100.2	99.8	99.8	101.4
650000	新疆	0	87.6277	43.793	价格指数	文化办公用品类商品零售价格指数(上年=100)	价格指数-商品零售价格分类指数(上年=100)-文化办公用品类商品零售价格指数(上年=100)		文化办公用品包括学习和办公用的纸张、文具、计算机及其配件、打印机及配件、复印机、扫描仪、油印机、速印机、电子辞典、计算器、印刷材料以及教学用的设备、普通测绘仪器、器材、标本、模型等，不包括通讯器材。计算机及其配套产品包括大、中、小、微型、台式和手提式电子计算机、掌上电脑和计算机的辅助设备，如不间断电源、多媒体配件以及专用设备、零配件，计算机用光盘、磁盘、磁带等，不包括单板机、插卡式电脑学习机和各种电子计算机软件。打印机及配件包括各种打印机（针式、喷墨、激光）以及相关的打印机用纸、色带、硒鼓等。关注微信公众号“马克数据网”	99.2	98.7	98.5	99.5	100.1	98	99.2	98.3	98.6	99.2	103.1	102.6
320000	江苏	1	118.763	32.0617	价格指数	文化办公用品类商品零售价格指数(上年=100)	价格指数-商品零售价格分类指数(上年=100)-文化办公用品类商品零售价格指数(上年=100)		文化办公用品包括学习和办公用的纸张、文具、计算机及其配件、打印机及配件、复印机、扫描仪、油印机、速印机、电子辞典、计算器、印刷材料以及教学用的设备、普通测绘仪器、器材、标本、模型等，不包括通讯器材。计算机及其配套产品包括大、中、小、微型、台式和手提式电子计算机、掌上电脑和计算机的辅助设备，如不间断电源、多媒体配件以及专用设备、零配件，计算机用光盘、磁盘、磁带等，不包括单板机、插卡式电脑学习机和各种电子计算机软件。打印机及配件包括各种打印机（针式、喷墨、激光）以及相关的打印机用纸、色带、硒鼓等。百度搜索“马 克 数 据 网”	96.5	96.5	97.2	99.5	100.5	100.7	97.9	99.8	101.4	101.8	103.7	102.6
360000	江西	1	115.909	28.6757	价格指数	文化办公用品类商品零售价格指数(上年=100)	价格指数-商品零售价格分类指数(上年=100)-文化办公用品类商品零售价格指数(上年=100)		文化办公用品包括学习和办公用的纸张、文具、计算机及其配件、打印机及配件、复印机、扫描仪、油印机、速印机、电子辞典、计算器、印刷材料以及教学用的设备、普通测绘仪器、器材、标本、模型等，不包括通讯器材。计算机及其配套产品包括大、中、小、微型、台式和手提式电子计算机、掌上电脑和计算机的辅助设备，如不间断电源、多媒体配件以及专用设备、零配件，计算机用光盘、磁盘、磁带等，不包括单板机、插卡式电脑学习机和各种电子计算机软件。打印机及配件包括各种打印机（针式、喷墨、激光）以及相关的打印机用纸、色带、硒鼓等。微信公众号“马克数据网”	97.9	99.7	99.4	98	99.2	99.8	100.6	103.1	100.6	100.2	100.2	99.1
130000	河北	0	114.469	38.0371	价格指数	文化办公用品类商品零售价格指数(上年=100)	价格指数-商品零售价格分类指数(上年=100)-文化办公用品类商品零售价格指数(上年=100)		文化办公用品包括学习和办公用的纸张、文具、计算机及其配件、打印机及配件、复印机、扫描仪、油印机、速印机、电子辞典、计算器、印刷材料以及教学用的设备、普通测绘仪器、器材、标本、模型等，不包括通讯器材。计算机及其配套产品包括大、中、小、微型、台式和手提式电子计算机、掌上电脑和计算机的辅助设备，如不间断电源、多媒体配件以及专用设备、零配件，计算机用光盘、磁盘、磁带等，不包括单板机、插卡式电脑学习机和各种电子计算机软件。打印机及配件包括各种打印机（针式、喷墨、激光）以及相关的打印机用纸、色带、硒鼓等。关注公众号“马 克 数 据 网”	97.3	97.4	98.4	99.5	100	100.1	100.2	99.2	100.1	100	98.1	100.7
410000	河南	0	113.754	34.7655	价格指数	文化办公用品类商品零售价格指数(上年=100)	价格指数-商品零售价格分类指数(上年=100)-文化办公用品类商品零售价格指数(上年=100)		文化办公用品包括学习和办公用的纸张、文具、计算机及其配件、打印机及配件、复印机、扫描仪、油印机、速印机、电子辞典、计算器、印刷材料以及教学用的设备、普通测绘仪器、器材、标本、模型等，不包括通讯器材。计算机及其配套产品包括大、中、小、微型、台式和手提式电子计算机、掌上电脑和计算机的辅助设备，如不间断电源、多媒体配件以及专用设备、零配件，计算机用光盘、磁盘、磁带等，不包括单板机、插卡式电脑学习机和各种电子计算机软件。打印机及配件包括各种打印机（针式、喷墨、激光）以及相关的打印机用纸、色带、硒鼓等。微信公众号“马克 数据网”	98.7	98.5	99.3	99.2	100	99	100.7	103.2	100.5	103.2	100.9	102.1
330000	浙江	1	120.153	30.2674	价格指数	文化办公用品类商品零售价格指数(上年=100)	价格指数-商品零售价格分类指数(上年=100)-文化办公用品类商品零售价格指数(上年=100)		文化办公用品包括学习和办公用的纸张、文具、计算机及其配件、打印机及配件、复印机、扫描仪、油印机、速印机、电子辞典、计算器、印刷材料以及教学用的设备、普通测绘仪器、器材、标本、模型等，不包括通讯器材。计算机及其配套产品包括大、中、小、微型、台式和手提式电子计算机、掌上电脑和计算机的辅助设备，如不间断电源、多媒体配件以及专用设备、零配件，计算机用光盘、磁盘、磁带等，不包括单板机、插卡式电脑学习机和各种电子计算机软件。打印机及配件包括各种打印机（针式、喷墨、激光）以及相关的打印机用纸、色带、硒鼓等。更多数据：搜索“马克数据网”来源：www.macrodatas.cn	98.1	97.9	97.3	98.2	99.6	100	98.4	99.2	100.5	100.3	99.8	101
460000	海南	0	110.349	20.0174	价格指数	文化办公用品类商品零售价格指数(上年=100)	价格指数-商品零售价格分类指数(上年=100)-文化办公用品类商品零售价格指数(上年=100)		文化办公用品包括学习和办公用的纸张、文具、计算机及其配件、打印机及配件、复印机、扫描仪、油印机、速印机、电子辞典、计算器、印刷材料以及教学用的设备、普通测绘仪器、器材、标本、模型等，不包括通讯器材。计算机及其配套产品包括大、中、小、微型、台式和手提式电子计算机、掌上电脑和计算机的辅助设备，如不间断电源、多媒体配件以及专用设备、零配件，计算机用光盘、磁盘、磁带等，不包括单板机、插卡式电脑学习机和各种电子计算机软件。打印机及配件包括各种打印机（针式、喷墨、激光）以及相关的打印机用纸、色带、硒鼓等。来源：百度搜索“马克数据网”	98.5	100.6	100	99.2	103.7	101.1	99.6	99.5	99.9	99.3	99.9	101.6
420000	湖北	1	114.342	30.5465	价格指数	文化办公用品类商品零售价格指数(上年=100)	价格指数-商品零售价格分类指数(上年=100)-文化办公用品类商品零售价格指数(上年=100)		文化办公用品包括学习和办公用的纸张、文具、计算机及其配件、打印机及配件、复印机、扫描仪、油印机、速印机、电子辞典、计算器、印刷材料以及教学用的设备、普通测绘仪器、器材、标本、模型等，不包括通讯器材。计算机及其配套产品包括大、中、小、微型、台式和手提式电子计算机、掌上电脑和计算机的辅助设备，如不间断电源、多媒体配件以及专用设备、零配件，计算机用光盘、磁盘、磁带等，不包括单板机、插卡式电脑学习机和各种电子计算机软件。打印机及配件包括各种打印机（针式、喷墨、激光）以及相关的打印机用纸、色带、硒鼓等。来自马克数据网	97.4	98.8	98.9	99.1	98.8	99.9	99.7	98.9	98.9	98.2	101.4	100.7
430000	湖南	1	112.984	28.1124	价格指数	文化办公用品类商品零售价格指数(上年=100)	价格指数-商品零售价格分类指数(上年=100)-文化办公用品类商品零售价格指数(上年=100)		文化办公用品包括学习和办公用的纸张、文具、计算机及其配件、打印机及配件、复印机、扫描仪、油印机、速印机、电子辞典、计算器、印刷材料以及教学用的设备、普通测绘仪器、器材、标本、模型等，不包括通讯器材。计算机及其配套产品包括大、中、小、微型、台式和手提式电子计算机、掌上电脑和计算机的辅助设备，如不间断电源、多媒体配件以及专用设备、零配件，计算机用光盘、磁盘、磁带等，不包括单板机、插卡式电脑学习机和各种电子计算机软件。打印机及配件包括各种打印机（针式、喷墨、激光）以及相关的打印机用纸、色带、硒鼓等。来源：马 克 数 据 网	99.9	100.8	99.6	99.8	100.4	99.8	99.8	100.7	100.8	100.8	100.3	100.7
620000	甘肃	0	103.826	36.0594	价格指数	文化办公用品类商品零售价格指数(上年=100)	价格指数-商品零售价格分类指数(上年=100)-文化办公用品类商品零售价格指数(上年=100)		文化办公用品包括学习和办公用的纸张、文具、计算机及其配件、打印机及配件、复印机、扫描仪、油印机、速印机、电子辞典、计算器、印刷材料以及教学用的设备、普通测绘仪器、器材、标本、模型等，不包括通讯器材。计算机及其配套产品包括大、中、小、微型、台式和手提式电子计算机、掌上电脑和计算机的辅助设备，如不间断电源、多媒体配件以及专用设备、零配件，计算机用光盘、磁盘、磁带等，不包括单板机、插卡式电脑学习机和各种电子计算机软件。打印机及配件包括各种打印机（针式、喷墨、激光）以及相关的打印机用纸、色带、硒鼓等。更多数据：搜索“马克数据网”来源：www.macrodatas.cn	98.6	99.7	99.9	99.9	99.6	100.1	100	101.5	100.9	99.9	100.2	101.4
350000	福建	0	119.295	26.1008	价格指数	文化办公用品类商品零售价格指数(上年=100)	价格指数-商品零售价格分类指数(上年=100)-文化办公用品类商品零售价格指数(上年=100)		文化办公用品包括学习和办公用的纸张、文具、计算机及其配件、打印机及配件、复印机、扫描仪、油印机、速印机、电子辞典、计算器、印刷材料以及教学用的设备、普通测绘仪器、器材、标本、模型等，不包括通讯器材。计算机及其配套产品包括大、中、小、微型、台式和手提式电子计算机、掌上电脑和计算机的辅助设备，如不间断电源、多媒体配件以及专用设备、零配件，计算机用光盘、磁盘、磁带等，不包括单板机、插卡式电脑学习机和各种电子计算机软件。打印机及配件包括各种打印机（针式、喷墨、激光）以及相关的打印机用纸、色带、硒鼓等。来自马克数据网	98.3	98.6	98.6	98.5	97.9	99.1	98.8	101	100.3	99.8	101.1	101.5
540000	西藏	0	91.1172	29.6469	价格指数	文化办公用品类商品零售价格指数(上年=100)	价格指数-商品零售价格分类指数(上年=100)-文化办公用品类商品零售价格指数(上年=100)		文化办公用品包括学习和办公用的纸张、文具、计算机及其配件、打印机及配件、复印机、扫描仪、油印机、速印机、电子辞典、计算器、印刷材料以及教学用的设备、普通测绘仪器、器材、标本、模型等，不包括通讯器材。计算机及其配套产品包括大、中、小、微型、台式和手提式电子计算机、掌上电脑和计算机的辅助设备，如不间断电源、多媒体配件以及专用设备、零配件，计算机用光盘、磁盘、磁带等，不包括单板机、插卡式电脑学习机和各种电子计算机软件。打印机及配件包括各种打印机（针式、喷墨、激光）以及相关的打印机用纸、色带、硒鼓等。关注微信公众号“马克数据网”	96.2	96.4	97.8	99.3	96.9	100.5	100.7	100.4	99.6	100	99.5	100.3
520000	贵州	1	106.707	26.5982	价格指数	文化办公用品类商品零售价格指数(上年=100)	价格指数-商品零售价格分类指数(上年=100)-文化办公用品类商品零售价格指数(上年=100)		文化办公用品包括学习和办公用的纸张、文具、计算机及其配件、打印机及配件、复印机、扫描仪、油印机、速印机、电子辞典、计算器、印刷材料以及教学用的设备、普通测绘仪器、器材、标本、模型等，不包括通讯器材。计算机及其配套产品包括大、中、小、微型、台式和手提式电子计算机、掌上电脑和计算机的辅助设备，如不间断电源、多媒体配件以及专用设备、零配件，计算机用光盘、磁盘、磁带等，不包括单板机、插卡式电脑学习机和各种电子计算机软件。打印机及配件包括各种打印机（针式、喷墨、激光）以及相关的打印机用纸、色带、硒鼓等。微信公众号“马克 数据网”	100.1	98.1	98.4	98.6	98.6	98.8	98.9	99.7	100.7	99.7	99.5	101.4
210000	辽宁	0	123.429	41.8354	价格指数	文化办公用品类商品零售价格指数(上年=100)	价格指数-商品零售价格分类指数(上年=100)-文化办公用品类商品零售价格指数(上年=100)		文化办公用品包括学习和办公用的纸张、文具、计算机及其配件、打印机及配件、复印机、扫描仪、油印机、速印机、电子辞典、计算器、印刷材料以及教学用的设备、普通测绘仪器、器材、标本、模型等，不包括通讯器材。计算机及其配套产品包括大、中、小、微型、台式和手提式电子计算机、掌上电脑和计算机的辅助设备，如不间断电源、多媒体配件以及专用设备、零配件，计算机用光盘、磁盘、磁带等，不包括单板机、插卡式电脑学习机和各种电子计算机软件。打印机及配件包括各种打印机（针式、喷墨、激光）以及相关的打印机用纸、色带、硒鼓等。微信公众号“马克数据网”	97.3	97.5	99.1	99.5	99.6	100.3	100.4	98.7	98.3	100.2	96.9	101.1
500000	重庆	1	106.552	29.563	价格指数	文化办公用品类商品零售价格指数(上年=100)	价格指数-商品零售价格分类指数(上年=100)-文化办公用品类商品零售价格指数(上年=100)		文化办公用品包括学习和办公用的纸张、文具、计算机及其配件、打印机及配件、复印机、扫描仪、油印机、速印机、电子辞典、计算器、印刷材料以及教学用的设备、普通测绘仪器、器材、标本、模型等，不包括通讯器材。计算机及其配套产品包括大、中、小、微型、台式和手提式电子计算机、掌上电脑和计算机的辅助设备，如不间断电源、多媒体配件以及专用设备、零配件，计算机用光盘、磁盘、磁带等，不包括单板机、插卡式电脑学习机和各种电子计算机软件。打印机及配件包括各种打印机（针式、喷墨、激光）以及相关的打印机用纸、色带、硒鼓等。百度搜索“马 克 数 据 网”	95	93.2	98.2	98.7	99.7	100.1	102.4	102.6	100.8	100.7	99.3	101
610000	陕西	0	108.954	34.2655	价格指数	文化办公用品类商品零售价格指数(上年=100)	价格指数-商品零售价格分类指数(上年=100)-文化办公用品类商品零售价格指数(上年=100)		文化办公用品包括学习和办公用的纸张、文具、计算机及其配件、打印机及配件、复印机、扫描仪、油印机、速印机、电子辞典、计算器、印刷材料以及教学用的设备、普通测绘仪器、器材、标本、模型等，不包括通讯器材。计算机及其配套产品包括大、中、小、微型、台式和手提式电子计算机、掌上电脑和计算机的辅助设备，如不间断电源、多媒体配件以及专用设备、零配件，计算机用光盘、磁盘、磁带等，不包括单板机、插卡式电脑学习机和各种电子计算机软件。打印机及配件包括各种打印机（针式、喷墨、激光）以及相关的打印机用纸、色带、硒鼓等。微信公众号“马克数据网”	98.3	96.3	99	99.6	98.5	101.8	96.6	100.4	101.9	100.3	100.5	101.4
630000	青海	0	101.78	36.6209	价格指数	文化办公用品类商品零售价格指数(上年=100)	价格指数-商品零售价格分类指数(上年=100)-文化办公用品类商品零售价格指数(上年=100)		文化办公用品包括学习和办公用的纸张、文具、计算机及其配件、打印机及配件、复印机、扫描仪、油印机、速印机、电子辞典、计算器、印刷材料以及教学用的设备、普通测绘仪器、器材、标本、模型等，不包括通讯器材。计算机及其配套产品包括大、中、小、微型、台式和手提式电子计算机、掌上电脑和计算机的辅助设备，如不间断电源、多媒体配件以及专用设备、零配件，计算机用光盘、磁盘、磁带等，不包括单板机、插卡式电脑学习机和各种电子计算机软件。打印机及配件包括各种打印机（针式、喷墨、激光）以及相关的打印机用纸、色带、硒鼓等。来源：百度“马 克 数据网”	96.9	99.3	99.9	97.4	96.9	99.6	99	100.7	102.8	100.4	98.7	102.8
230000	黑龙江	0	126.662	45.7423	价格指数	文化办公用品类商品零售价格指数(上年=100)	价格指数-商品零售价格分类指数(上年=100)-文化办公用品类商品零售价格指数(上年=100)		文化办公用品包括学习和办公用的纸张、文具、计算机及其配件、打印机及配件、复印机、扫描仪、油印机、速印机、电子辞典、计算器、印刷材料以及教学用的设备、普通测绘仪器、器材、标本、模型等，不包括通讯器材。计算机及其配套产品包括大、中、小、微型、台式和手提式电子计算机、掌上电脑和计算机的辅助设备，如不间断电源、多媒体配件以及专用设备、零配件，计算机用光盘、磁盘、磁带等，不包括单板机、插卡式电脑学习机和各种电子计算机软件。打印机及配件包括各种打印机（针式、喷墨、激光）以及相关的打印机用纸、色带、硒鼓等。来自马克数据网	95.5	95.1	97.9	96.3	99.4	102	102.4	98.7	97.5	98.6	100	102
310000	上海	1	121.474	31.2304	文化	艺术表演团体机构数	文化-艺术表演团体、艺术表演场馆演出情况-艺术表演团体机构数	个	艺术表演团体指由文化部门主办或实行行业管理（经文化行政部门审批或已申报登记并领取相关许可证），专门从事表演艺术等活动的各类专业艺术表演团体，含民间职业剧团。不包括群众业余文艺表演团体。2007年以前艺术表演团体和艺术表演场馆为文化系统内数据，2007年起含非文化部门数据。更多数据：搜索“马克数据网”来源：www.macrodatas.cn	89	102	147	148	158	180	205	199	254	311	315	298
530000	云南	1	102.71	25.0458	文化	艺术表演团体机构数	文化-艺术表演团体、艺术表演场馆演出情况-艺术表演团体机构数	个	艺术表演团体指由文化部门主办或实行行业管理（经文化行政部门审批或已申报登记并领取相关许可证），专门从事表演艺术等活动的各类专业艺术表演团体，含民间职业剧团。不包括群众业余文艺表演团体。2007年以前艺术表演团体和艺术表演场馆为文化系统内数据，2007年起含非文化部门数据。来源：百度搜索“马克数据网”	142	161	220	259	284	276	221	316	268	304	270	312
150000	内蒙古	0	111.766	40.8175	文化	艺术表演团体机构数	文化-艺术表演团体、艺术表演场馆演出情况-艺术表演团体机构数	个	艺术表演团体指由文化部门主办或实行行业管理（经文化行政部门审批或已申报登记并领取相关许可证），专门从事表演艺术等活动的各类专业艺术表演团体，含民间职业剧团。不包括群众业余文艺表演团体。2007年以前艺术表演团体和艺术表演场馆为文化系统内数据，2007年起含非文化部门数据。百度搜索“马 克 数 据 网”	123	121	137	144	177	175	186	206	226	264	204	221
110000	北京	0	116.408	39.904	文化	艺术表演团体机构数	文化-艺术表演团体、艺术表演场馆演出情况-艺术表演团体机构数	个	艺术表演团体指由文化部门主办或实行行业管理（经文化行政部门审批或已申报登记并领取相关许可证），专门从事表演艺术等活动的各类专业艺术表演团体，含民间职业剧团。不包括群众业余文艺表演团体。2007年以前艺术表演团体和艺术表演场馆为文化系统内数据，2007年起含非文化部门数据。来自马克数据网	18	118	324	292	344	395	485	451	414	370	393	495
220000	吉林	0	125.326	43.8965	文化	艺术表演团体机构数	文化-艺术表演团体、艺术表演场馆演出情况-艺术表演团体机构数	个	艺术表演团体指由文化部门主办或实行行业管理（经文化行政部门审批或已申报登记并领取相关许可证），专门从事表演艺术等活动的各类专业艺术表演团体，含民间职业剧团。不包括群众业余文艺表演团体。2007年以前艺术表演团体和艺术表演场馆为文化系统内数据，2007年起含非文化部门数据。来自马克数据网	68	67	41	54	56	49	54	68	82	95	104	114
510000	四川	1	104.076	30.6517	文化	艺术表演团体机构数	文化-艺术表演团体、艺术表演场馆演出情况-艺术表演团体机构数	个	艺术表演团体指由文化部门主办或实行行业管理（经文化行政部门审批或已申报登记并领取相关许可证），专门从事表演艺术等活动的各类专业艺术表演团体，含民间职业剧团。不包括群众业余文艺表演团体。2007年以前艺术表演团体和艺术表演场馆为文化系统内数据，2007年起含非文化部门数据。关注公众号“马 克 数 据 网”	348	370	469	510	492	543	621	697	829	732	725	663
120000	天津	0	117.201	39.0842	文化	艺术表演团体机构数	文化-艺术表演团体、艺术表演场馆演出情况-艺术表演团体机构数	个	艺术表演团体指由文化部门主办或实行行业管理（经文化行政部门审批或已申报登记并领取相关许可证），专门从事表演艺术等活动的各类专业艺术表演团体，含民间职业剧团。不包括群众业余文艺表演团体。2007年以前艺术表演团体和艺术表演场馆为文化系统内数据，2007年起含非文化部门数据。关注微信公众号“马克数据网”	36	53	48	58	66	86	84	103	121	151	113	112
640000	宁夏	0	106.259	38.4713	文化	艺术表演团体机构数	文化-艺术表演团体、艺术表演场馆演出情况-艺术表演团体机构数	个	艺术表演团体指由文化部门主办或实行行业管理（经文化行政部门审批或已申报登记并领取相关许可证），专门从事表演艺术等活动的各类专业艺术表演团体，含民间职业剧团。不包括群众业余文艺表演团体。2007年以前艺术表演团体和艺术表演场馆为文化系统内数据，2007年起含非文化部门数据。关注公众号“马 克 数 据 网”	45	37	16	33	31	40	34	45	75	30	30	43
340000	安徽	1	117.285	31.8612	文化	艺术表演团体机构数	文化-艺术表演团体、艺术表演场馆演出情况-艺术表演团体机构数	个	艺术表演团体指由文化部门主办或实行行业管理（经文化行政部门审批或已申报登记并领取相关许可证），专门从事表演艺术等活动的各类专业艺术表演团体，含民间职业剧团。不包括群众业余文艺表演团体。2007年以前艺术表演团体和艺术表演场馆为文化系统内数据，2007年起含非文化部门数据。微信公众号“马克 数据网”	1255	1294	1015	991	988	1617	1879	2639	2859	2628	2334	2870
370000	山东	0	117.02	36.6685	文化	艺术表演团体机构数	文化-艺术表演团体、艺术表演场馆演出情况-艺术表演团体机构数	个	艺术表演团体指由文化部门主办或实行行业管理（经文化行政部门审批或已申报登记并领取相关许可证），专门从事表演艺术等活动的各类专业艺术表演团体，含民间职业剧团。不包括群众业余文艺表演团体。2007年以前艺术表演团体和艺术表演场馆为文化系统内数据，2007年起含非文化部门数据。微信公众号“马克 数据网”	119	252	303	414	481	623	567	772	828	1306	1566	1572
140000	山西	0	112.562	37.8735	文化	艺术表演团体机构数	文化-艺术表演团体、艺术表演场馆演出情况-艺术表演团体机构数	个	艺术表演团体指由文化部门主办或实行行业管理（经文化行政部门审批或已申报登记并领取相关许可证），专门从事表演艺术等活动的各类专业艺术表演团体，含民间职业剧团。不包括群众业余文艺表演团体。2007年以前艺术表演团体和艺术表演场馆为文化系统内数据，2007年起含非文化部门数据。来自：www.macrodatas.cn	342	308	301	226	351	456	546	665	795	779	827	814
440000	广东	0	113.267	23.1322	文化	艺术表演团体机构数	文化-艺术表演团体、艺术表演场馆演出情况-艺术表演团体机构数	个	艺术表演团体指由文化部门主办或实行行业管理（经文化行政部门审批或已申报登记并领取相关许可证），专门从事表演艺术等活动的各类专业艺术表演团体，含民间职业剧团。不包括群众业余文艺表演团体。2007年以前艺术表演团体和艺术表演场馆为文化系统内数据，2007年起含非文化部门数据。马 克 数 据 网	397	401	337	405	325	391	357	390	436	397	475	447
450000	广西	0	108.328	22.8155	文化	艺术表演团体机构数	文化-艺术表演团体、艺术表演场馆演出情况-艺术表演团体机构数	个	艺术表演团体指由文化部门主办或实行行业管理（经文化行政部门审批或已申报登记并领取相关许可证），专门从事表演艺术等活动的各类专业艺术表演团体，含民间职业剧团。不包括群众业余文艺表演团体。2007年以前艺术表演团体和艺术表演场馆为文化系统内数据，2007年起含非文化部门数据。关注公众号“马 克 数 据 网”	141	149	68	59	67	92	100	108	112	95	78	72
650000	新疆	0	87.6277	43.793	文化	艺术表演团体机构数	文化-艺术表演团体、艺术表演场馆演出情况-艺术表演团体机构数	个	艺术表演团体指由文化部门主办或实行行业管理（经文化行政部门审批或已申报登记并领取相关许可证），专门从事表演艺术等活动的各类专业艺术表演团体，含民间职业剧团。不包括群众业余文艺表演团体。2007年以前艺术表演团体和艺术表演场馆为文化系统内数据，2007年起含非文化部门数据。微信公众号“马克数据网”	132	133	137	123	122	132	131	127	134	132	124	113
320000	江苏	1	118.763	32.0617	文化	艺术表演团体机构数	文化-艺术表演团体、艺术表演场馆演出情况-艺术表演团体机构数	个	艺术表演团体指由文化部门主办或实行行业管理（经文化行政部门审批或已申报登记并领取相关许可证），专门从事表演艺术等活动的各类专业艺术表演团体，含民间职业剧团。不包括群众业余文艺表演团体。2007年以前艺术表演团体和艺术表演场馆为文化系统内数据，2007年起含非文化部门数据。来自：www.macrodatas.cn	408	370	434	291	287	369	444	628	662	626	620	704
360000	江西	1	115.909	28.6757	文化	艺术表演团体机构数	文化-艺术表演团体、艺术表演场馆演出情况-艺术表演团体机构数	个	艺术表演团体指由文化部门主办或实行行业管理（经文化行政部门审批或已申报登记并领取相关许可证），专门从事表演艺术等活动的各类专业艺术表演团体，含民间职业剧团。不包括群众业余文艺表演团体。2007年以前艺术表演团体和艺术表演场馆为文化系统内数据，2007年起含非文化部门数据。来自：www.macrodatas.cn	99	99	187	229	219	236	304	425	379	337	380	395
130000	河北	0	114.469	38.0371	文化	艺术表演团体机构数	文化-艺术表演团体、艺术表演场馆演出情况-艺术表演团体机构数	个	艺术表演团体指由文化部门主办或实行行业管理（经文化行政部门审批或已申报登记并领取相关许可证），专门从事表演艺术等活动的各类专业艺术表演团体，含民间职业剧团。不包括群众业余文艺表演团体。2007年以前艺术表演团体和艺术表演场馆为文化系统内数据，2007年起含非文化部门数据。更多数据：搜索“马克数据网”来源：www.macrodatas.cn	284	312	448	500	458	596	712	735	450	749	770	874
410000	河南	0	113.754	34.7655	文化	艺术表演团体机构数	文化-艺术表演团体、艺术表演场馆演出情况-艺术表演团体机构数	个	艺术表演团体指由文化部门主办或实行行业管理（经文化行政部门审批或已申报登记并领取相关许可证），专门从事表演艺术等活动的各类专业艺术表演团体，含民间职业剧团。不包括群众业余文艺表演团体。2007年以前艺术表演团体和艺术表演场馆为文化系统内数据，2007年起含非文化部门数据。微信公众号“马克 数据网”	371	468	364	429	598	824	1006	1671	2017	2221	2391	2249
330000	浙江	1	120.153	30.2674	文化	艺术表演团体机构数	文化-艺术表演团体、艺术表演场馆演出情况-艺术表演团体机构数	个	艺术表演团体指由文化部门主办或实行行业管理（经文化行政部门审批或已申报登记并领取相关许可证），专门从事表演艺术等活动的各类专业艺术表演团体，含民间职业剧团。不包括群众业余文艺表演团体。2007年以前艺术表演团体和艺术表演场馆为文化系统内数据，2007年起含非文化部门数据。百度搜索“马 克 数 据 网”	471	498	609	733	891	1024	1245	1410	1573	1550	1236	1357
460000	海南	0	110.349	20.0174	文化	艺术表演团体机构数	文化-艺术表演团体、艺术表演场馆演出情况-艺术表演团体机构数	个	艺术表演团体指由文化部门主办或实行行业管理（经文化行政部门审批或已申报登记并领取相关许可证），专门从事表演艺术等活动的各类专业艺术表演团体，含民间职业剧团。不包括群众业余文艺表演团体。2007年以前艺术表演团体和艺术表演场馆为文化系统内数据，2007年起含非文化部门数据。来源：马 克 数 据 网	67	86	61	67	71	66	74	77	82	111	102	127
420000	湖北	1	114.342	30.5465	文化	艺术表演团体机构数	文化-艺术表演团体、艺术表演场馆演出情况-艺术表演团体机构数	个	艺术表演团体指由文化部门主办或实行行业管理（经文化行政部门审批或已申报登记并领取相关许可证），专门从事表演艺术等活动的各类专业艺术表演团体，含民间职业剧团。不包括群众业余文艺表演团体。2007年以前艺术表演团体和艺术表演场馆为文化系统内数据，2007年起含非文化部门数据。来源：百度搜索“马克数据网”	204	172	226	307	273	282	308	473	489	388	441	415
430000	湖南	1	112.984	28.1124	文化	艺术表演团体机构数	文化-艺术表演团体、艺术表演场馆演出情况-艺术表演团体机构数	个	艺术表演团体指由文化部门主办或实行行业管理（经文化行政部门审批或已申报登记并领取相关许可证），专门从事表演艺术等活动的各类专业艺术表演团体，含民间职业剧团。不包括群众业余文艺表演团体。2007年以前艺术表演团体和艺术表演场馆为文化系统内数据，2007年起含非文化部门数据。来自：www.macrodatas.cn	201	114	157	227	271	273	452	534	510	575	631	675
620000	甘肃	0	103.826	36.0594	文化	艺术表演团体机构数	文化-艺术表演团体、艺术表演场馆演出情况-艺术表演团体机构数	个	艺术表演团体指由文化部门主办或实行行业管理（经文化行政部门审批或已申报登记并领取相关许可证），专门从事表演艺术等活动的各类专业艺术表演团体，含民间职业剧团。不包括群众业余文艺表演团体。2007年以前艺术表演团体和艺术表演场馆为文化系统内数据，2007年起含非文化部门数据。来自马克数据网	82	84	103	124	190	191	227	286	351	343	347	392
350000	福建	0	119.295	26.1008	文化	艺术表演团体机构数	文化-艺术表演团体、艺术表演场馆演出情况-艺术表演团体机构数	个	艺术表演团体指由文化部门主办或实行行业管理（经文化行政部门审批或已申报登记并领取相关许可证），专门从事表演艺术等活动的各类专业艺术表演团体，含民间职业剧团。不包括群众业余文艺表演团体。2007年以前艺术表演团体和艺术表演场馆为文化系统内数据，2007年起含非文化部门数据。百度搜索“马 克 数 据 网”	449	454	341	506	393	397	429	426	454	455	558	545
540000	西藏	0	91.1172	29.6469	文化	艺术表演团体机构数	文化-艺术表演团体、艺术表演场馆演出情况-艺术表演团体机构数	个	艺术表演团体指由文化部门主办或实行行业管理（经文化行政部门审批或已申报登记并领取相关许可证），专门从事表演艺术等活动的各类专业艺术表演团体，含民间职业剧团。不包括群众业余文艺表演团体。2007年以前艺术表演团体和艺术表演场馆为文化系统内数据，2007年起含非文化部门数据。来自：www.macrodatas.cn	37	47	92	79	88	87	87	87	86	85	87	89
520000	贵州	1	106.707	26.5982	文化	艺术表演团体机构数	文化-艺术表演团体、艺术表演场馆演出情况-艺术表演团体机构数	个	艺术表演团体指由文化部门主办或实行行业管理（经文化行政部门审批或已申报登记并领取相关许可证），专门从事表演艺术等活动的各类专业艺术表演团体，含民间职业剧团。不包括群众业余文艺表演团体。2007年以前艺术表演团体和艺术表演场馆为文化系统内数据，2007年起含非文化部门数据。更多数据：www.macrodatas.cn	52	45	79	106	105	95	113	137	153	158	200	133
210000	辽宁	0	123.429	41.8354	文化	艺术表演团体机构数	文化-艺术表演团体、艺术表演场馆演出情况-艺术表演团体机构数	个	艺术表演团体指由文化部门主办或实行行业管理（经文化行政部门审批或已申报登记并领取相关许可证），专门从事表演艺术等活动的各类专业艺术表演团体，含民间职业剧团。不包括群众业余文艺表演团体。2007年以前艺术表演团体和艺术表演场馆为文化系统内数据，2007年起含非文化部门数据。更多数据：搜索“马克数据网”来源：www.macrodatas.cn	239	200	155	212	207	263	246	187	192	238	186	184
500000	重庆	1	106.552	29.563	文化	艺术表演团体机构数	文化-艺术表演团体、艺术表演场馆演出情况-艺术表演团体机构数	个	艺术表演团体指由文化部门主办或实行行业管理（经文化行政部门审批或已申报登记并领取相关许可证），专门从事表演艺术等活动的各类专业艺术表演团体，含民间职业剧团。不包括群众业余文艺表演团体。2007年以前艺术表演团体和艺术表演场馆为文化系统内数据，2007年起含非文化部门数据。搜索“马 克 数 据 网”	381	282	244	443	512	730	770	1283	1571	1646	1265	1286
610000	陕西	0	108.954	34.2655	文化	艺术表演团体机构数	文化-艺术表演团体、艺术表演场馆演出情况-艺术表演团体机构数	个	艺术表演团体指由文化部门主办或实行行业管理（经文化行政部门审批或已申报登记并领取相关许可证），专门从事表演艺术等活动的各类专业艺术表演团体，含民间职业剧团。不包括群众业余文艺表演团体。2007年以前艺术表演团体和艺术表演场馆为文化系统内数据，2007年起含非文化部门数据。关注公众号“马克数据网”	127	115	116	119	143	177	281	462	531	516	591	577
630000	青海	0	101.78	36.6209	文化	艺术表演团体机构数	文化-艺术表演团体、艺术表演场馆演出情况-艺术表演团体机构数	个	艺术表演团体指由文化部门主办或实行行业管理（经文化行政部门审批或已申报登记并领取相关许可证），专门从事表演艺术等活动的各类专业艺术表演团体，含民间职业剧团。不包括群众业余文艺表演团体。2007年以前艺术表演团体和艺术表演场馆为文化系统内数据，2007年起含非文化部门数据。微信公众号“马克数据网”	32	38	40	37	64	54	60	48	84	100	122	116
230000	黑龙江	0	126.662	45.7423	文化	艺术表演团体机构数	文化-艺术表演团体、艺术表演场馆演出情况-艺术表演团体机构数	个	艺术表演团体指由文化部门主办或实行行业管理（经文化行政部门审批或已申报登记并领取相关许可证），专门从事表演艺术等活动的各类专业艺术表演团体，含民间职业剧团。不包括群众业余文艺表演团体。2007年以前艺术表演团体和艺术表演场馆为文化系统内数据，2007年起含非文化部门数据。微信公众号“马克 数据网”	89	88	85	35	39	51	57	71	90	87	82	97
310000	上海	1	121.474	31.2304	文化	艺术表演团体演出场次	文化-艺术表演团体、艺术表演场馆演出情况-艺术表演团体演出场次	万场次	艺术表演团体指由文化部门主办或实行行业管理（经文化行政部门审批或已申报登记并领取相关许可证），专门从事表演艺术等活动的各类专业艺术表演团体，含民间职业剧团。不包括群众业余文艺表演团体。来自：www.macrodatas.cn		2.18	3.97	3.41	2.8	2.89	2.48	2.64	3.57	7.29	1.75	2.8
530000	云南	1	102.71	25.0458	文化	艺术表演团体演出场次	文化-艺术表演团体、艺术表演场馆演出情况-艺术表演团体演出场次	万场次	艺术表演团体指由文化部门主办或实行行业管理（经文化行政部门审批或已申报登记并领取相关许可证），专门从事表演艺术等活动的各类专业艺术表演团体，含民间职业剧团。不包括群众业余文艺表演团体。来源：百度搜索“马克数据网”		2.04	2.66	3.87	5.34	4.57	4.45	5.6	4.98	7.57	5.05	2.44
150000	内蒙古	0	111.766	40.8175	文化	艺术表演团体演出场次	文化-艺术表演团体、艺术表演场馆演出情况-艺术表演团体演出场次	万场次	艺术表演团体指由文化部门主办或实行行业管理（经文化行政部门审批或已申报登记并领取相关许可证），专门从事表演艺术等活动的各类专业艺术表演团体，含民间职业剧团。不包括群众业余文艺表演团体。微信公众号“马克数据网”		2.08	2.19	2.66	2.56	3.91	2.45	2.88	3.13	3.36	1.94	1.88
110000	北京	0	116.408	39.904	文化	艺术表演团体演出场次	文化-艺术表演团体、艺术表演场馆演出情况-艺术表演团体演出场次	万场次	艺术表演团体指由文化部门主办或实行行业管理（经文化行政部门审批或已申报登记并领取相关许可证），专门从事表演艺术等活动的各类专业艺术表演团体，含民间职业剧团。不包括群众业余文艺表演团体。百度搜索“马 克 数 据 网”		1.45	2.34	2.24	2.48	2.8	2.69	6.08	2.55	2.43	1.26	2.29
220000	吉林	0	125.326	43.8965	文化	艺术表演团体演出场次	文化-艺术表演团体、艺术表演场馆演出情况-艺术表演团体演出场次	万场次	艺术表演团体指由文化部门主办或实行行业管理（经文化行政部门审批或已申报登记并领取相关许可证），专门从事表演艺术等活动的各类专业艺术表演团体，含民间职业剧团。不包括群众业余文艺表演团体。更多数据：www.macrodatas.cn		0.9	0.67	0.64	0.59	0.6	0.59	0.7	1.23	0.65	0.48	0.62
510000	四川	1	104.076	30.6517	文化	艺术表演团体演出场次	文化-艺术表演团体、艺术表演场馆演出情况-艺术表演团体演出场次	万场次	艺术表演团体指由文化部门主办或实行行业管理（经文化行政部门审批或已申报登记并领取相关许可证），专门从事表演艺术等活动的各类专业艺术表演团体，含民间职业剧团。不包括群众业余文艺表演团体。来源：百度“马 克 数据网”		6.27	6.67	7.65	6.42	10.26	8.42	7.77	10.93	6.14	3.65	4.5
120000	天津	0	117.201	39.0842	文化	艺术表演团体演出场次	文化-艺术表演团体、艺术表演场馆演出情况-艺术表演团体演出场次	万场次	艺术表演团体指由文化部门主办或实行行业管理（经文化行政部门审批或已申报登记并领取相关许可证），专门从事表演艺术等活动的各类专业艺术表演团体，含民间职业剧团。不包括群众业余文艺表演团体。来自：www.macrodatas.cn		0.43	0.52	0.69	1.1	1.76	0.79	0.91	1.11	0.92	0.5	1
640000	宁夏	0	106.259	38.4713	文化	艺术表演团体演出场次	文化-艺术表演团体、艺术表演场馆演出情况-艺术表演团体演出场次	万场次	艺术表演团体指由文化部门主办或实行行业管理（经文化行政部门审批或已申报登记并领取相关许可证），专门从事表演艺术等活动的各类专业艺术表演团体，含民间职业剧团。不包括群众业余文艺表演团体。来源：马 克 数 据 网		0.62	0.34	0.93	1.41	0.62	0.53	1.78	0.76	0.5	0.29	0.38
340000	安徽	1	117.285	31.8612	文化	艺术表演团体演出场次	文化-艺术表演团体、艺术表演场馆演出情况-艺术表演团体演出场次	万场次	艺术表演团体指由文化部门主办或实行行业管理（经文化行政部门审批或已申报登记并领取相关许可证），专门从事表演艺术等活动的各类专业艺术表演团体，含民间职业剧团。不包括群众业余文艺表演团体。马 克 数 据 网		14.89	25.1	31.73	28.96	39.1	45.87	58.23	50.52	34.71	30.16	40.77
370000	山东	0	117.02	36.6685	文化	艺术表演团体演出场次	文化-艺术表演团体、艺术表演场馆演出情况-艺术表演团体演出场次	万场次	艺术表演团体指由文化部门主办或实行行业管理（经文化行政部门审批或已申报登记并领取相关许可证），专门从事表演艺术等活动的各类专业艺术表演团体，含民间职业剧团。不包括群众业余文艺表演团体。更多数据：搜索“马克数据网”来源：www.macrodatas.cn		3.21	3.81	5.41	16.5	13.32	8.43	10.89	22.33	13.73	14	17.93
140000	山西	0	112.562	37.8735	文化	艺术表演团体演出场次	文化-艺术表演团体、艺术表演场馆演出情况-艺术表演团体演出场次	万场次	艺术表演团体指由文化部门主办或实行行业管理（经文化行政部门审批或已申报登记并领取相关许可证），专门从事表演艺术等活动的各类专业艺术表演团体，含民间职业剧团。不包括群众业余文艺表演团体。微信公众号“马克数据网”		5.3	5.07	3.93	5.54	6.11	9.25	10.26	9.57	9.76	6.16	21.34
440000	广东	0	113.267	23.1322	文化	艺术表演团体演出场次	文化-艺术表演团体、艺术表演场馆演出情况-艺术表演团体演出场次	万场次	艺术表演团体指由文化部门主办或实行行业管理（经文化行政部门审批或已申报登记并领取相关许可证），专门从事表演艺术等活动的各类专业艺术表演团体，含民间职业剧团。不包括群众业余文艺表演团体。微信公众号“马克 数据网”		5.45	5	4.24	4.7	4.13	3.88	4.15	4.63	4.65	3.39	8.93
450000	广西	0	108.328	22.8155	文化	艺术表演团体演出场次	文化-艺术表演团体、艺术表演场馆演出情况-艺术表演团体演出场次	万场次	艺术表演团体指由文化部门主办或实行行业管理（经文化行政部门审批或已申报登记并领取相关许可证），专门从事表演艺术等活动的各类专业艺术表演团体，含民间职业剧团。不包括群众业余文艺表演团体。关注公众号“马 克 数 据 网”		1.32	1.2	1.54	0.92	1.37	1.2	1.44	1.71	1.85	0.94	0.89
650000	新疆	0	87.6277	43.793	文化	艺术表演团体演出场次	文化-艺术表演团体、艺术表演场馆演出情况-艺术表演团体演出场次	万场次	艺术表演团体指由文化部门主办或实行行业管理（经文化行政部门审批或已申报登记并领取相关许可证），专门从事表演艺术等活动的各类专业艺术表演团体，含民间职业剧团。不包括群众业余文艺表演团体。更多数据：www.macrodatas.cn		1.6	1.89	1.45	1.68	1.76	1.69	1.67	1.85	3.73	2.12	1.63
320000	江苏	1	118.763	32.0617	文化	艺术表演团体演出场次	文化-艺术表演团体、艺术表演场馆演出情况-艺术表演团体演出场次	万场次	艺术表演团体指由文化部门主办或实行行业管理（经文化行政部门审批或已申报登记并领取相关许可证），专门从事表演艺术等活动的各类专业艺术表演团体，含民间职业剧团。不包括群众业余文艺表演团体。关注微信公众号“马克数据网”		8.46	10.31	7.9	6.28	8.56	8.81	10.42	10.04	12.11	7.41	9.89
360000	江西	1	115.909	28.6757	文化	艺术表演团体演出场次	文化-艺术表演团体、艺术表演场馆演出情况-艺术表演团体演出场次	万场次	艺术表演团体指由文化部门主办或实行行业管理（经文化行政部门审批或已申报登记并领取相关许可证），专门从事表演艺术等活动的各类专业艺术表演团体，含民间职业剧团。不包括群众业余文艺表演团体。马 克 数 据 网		1.96	2.97	5.09	3.42	3.02	4.75	6.68	7.7	4.36	4.79	6.86
130000	河北	0	114.469	38.0371	文化	艺术表演团体演出场次	文化-艺术表演团体、艺术表演场馆演出情况-艺术表演团体演出场次	万场次	艺术表演团体指由文化部门主办或实行行业管理（经文化行政部门审批或已申报登记并领取相关许可证），专门从事表演艺术等活动的各类专业艺术表演团体，含民间职业剧团。不包括群众业余文艺表演团体。百度搜索“马 克 数 据 网”		5.21	6.95	7.53	7.75	8.26	9.19	9.58	9.92	9.27	8.02	4.26
410000	河南	0	113.754	34.7655	文化	艺术表演团体演出场次	文化-艺术表演团体、艺术表演场馆演出情况-艺术表演团体演出场次	万场次	艺术表演团体指由文化部门主办或实行行业管理（经文化行政部门审批或已申报登记并领取相关许可证），专门从事表演艺术等活动的各类专业艺术表演团体，含民间职业剧团。不包括群众业余文艺表演团体。更多数据：www.macrodatas.cn		14.09	9.83	26.1	20.64	35.62	46.27	64.68	39.23	38.98	30.62	22.9
330000	浙江	1	120.153	30.2674	文化	艺术表演团体演出场次	文化-艺术表演团体、艺术表演场馆演出情况-艺术表演团体演出场次	万场次	艺术表演团体指由文化部门主办或实行行业管理（经文化行政部门审批或已申报登记并领取相关许可证），专门从事表演艺术等活动的各类专业艺术表演团体，含民间职业剧团。不包括群众业余文艺表演团体。关注微信公众号“马克数据网”		13.61	13.63	14.55	18.27	21.82	28.87	37.05	37.87	37.54	20.38	26.51
460000	海南	0	110.349	20.0174	文化	艺术表演团体演出场次	文化-艺术表演团体、艺术表演场馆演出情况-艺术表演团体演出场次	万场次	艺术表演团体指由文化部门主办或实行行业管理（经文化行政部门审批或已申报登记并领取相关许可证），专门从事表演艺术等活动的各类专业艺术表演团体，含民间职业剧团。不包括群众业余文艺表演团体。来源：马 克 数 据 网		0.86	0.84	0.95	0.97	0.77	0.89	1.08	0.94	1.11	1.15	0.91
420000	湖北	1	114.342	30.5465	文化	艺术表演团体演出场次	文化-艺术表演团体、艺术表演场馆演出情况-艺术表演团体演出场次	万场次	艺术表演团体指由文化部门主办或实行行业管理（经文化行政部门审批或已申报登记并领取相关许可证），专门从事表演艺术等活动的各类专业艺术表演团体，含民间职业剧团。不包括群众业余文艺表演团体。关注微信公众号“马克数据网”		4.14	3.59	3.73	3.9	3.85	3.85	6.46	36.69	5.11	8.24	3.8
430000	湖南	1	112.984	28.1124	文化	艺术表演团体演出场次	文化-艺术表演团体、艺术表演场馆演出情况-艺术表演团体演出场次	万场次	艺术表演团体指由文化部门主办或实行行业管理（经文化行政部门审批或已申报登记并领取相关许可证），专门从事表演艺术等活动的各类专业艺术表演团体，含民间职业剧团。不包括群众业余文艺表演团体。百度搜索“马 克 数 据 网”		2.07	2.97	3.55	4.97	6.61	5.55	6.02	5.77	40.71	6.85	9.75
620000	甘肃	0	103.826	36.0594	文化	艺术表演团体演出场次	文化-艺术表演团体、艺术表演场馆演出情况-艺术表演团体演出场次	万场次	艺术表演团体指由文化部门主办或实行行业管理（经文化行政部门审批或已申报登记并领取相关许可证），专门从事表演艺术等活动的各类专业艺术表演团体，含民间职业剧团。不包括群众业余文艺表演团体。来自：www.macrodatas.cn		1.65	1.97	1.93	2.23	2.31	3.14	2.93	4.08	3.51	32.63	7.15
350000	福建	0	119.295	26.1008	文化	艺术表演团体演出场次	文化-艺术表演团体、艺术表演场馆演出情况-艺术表演团体演出场次	万场次	艺术表演团体指由文化部门主办或实行行业管理（经文化行政部门审批或已申报登记并领取相关许可证），专门从事表演艺术等活动的各类专业艺术表演团体，含民间职业剧团。不包括群众业余文艺表演团体。更多数据：www.macrodatas.cn		44.47	10.5	11.02	10.84	8.56	8.6	7.72	8.15	8.58	9.77	7.49
540000	西藏	0	91.1172	29.6469	文化	艺术表演团体演出场次	文化-艺术表演团体、艺术表演场馆演出情况-艺术表演团体演出场次	万场次	艺术表演团体指由文化部门主办或实行行业管理（经文化行政部门审批或已申报登记并领取相关许可证），专门从事表演艺术等活动的各类专业艺术表演团体，含民间职业剧团。不包括群众业余文艺表演团体。微信公众号“马克数据网”		0.28	0.87	0.46	0.54	0.57	0.58	0.58	0.65	0.67	0.66	0.64
520000	贵州	1	106.707	26.5982	文化	艺术表演团体演出场次	文化-艺术表演团体、艺术表演场馆演出情况-艺术表演团体演出场次	万场次	艺术表演团体指由文化部门主办或实行行业管理（经文化行政部门审批或已申报登记并领取相关许可证），专门从事表演艺术等活动的各类专业艺术表演团体，含民间职业剧团。不包括群众业余文艺表演团体。来源：百度“马 克 数据网”		0.55	1.22	1.63	1.65	0.84	1.07	1.47	1.31	2.15	1.47	1.71
210000	辽宁	0	123.429	41.8354	文化	艺术表演团体演出场次	文化-艺术表演团体、艺术表演场馆演出情况-艺术表演团体演出场次	万场次	艺术表演团体指由文化部门主办或实行行业管理（经文化行政部门审批或已申报登记并领取相关许可证），专门从事表演艺术等活动的各类专业艺术表演团体，含民间职业剧团。不包括群众业余文艺表演团体。搜索“马 克 数 据 网”		1.35	1.48	1.81	1.57	2.4	1.82	1.3	1.34	7.83	0.85	1.28
500000	重庆	1	106.552	29.563	文化	艺术表演团体演出场次	文化-艺术表演团体、艺术表演场馆演出情况-艺术表演团体演出场次	万场次	艺术表演团体指由文化部门主办或实行行业管理（经文化行政部门审批或已申报登记并领取相关许可证），专门从事表演艺术等活动的各类专业艺术表演团体，含民间职业剧团。不包括群众业余文艺表演团体。搜索“马 克 数 据 网”		3.73	2.55	4.81	6.21	9.58	9	15.16	18.95	19.82	12.93	12.39
610000	陕西	0	108.954	34.2655	文化	艺术表演团体演出场次	文化-艺术表演团体、艺术表演场馆演出情况-艺术表演团体演出场次	万场次	艺术表演团体指由文化部门主办或实行行业管理（经文化行政部门审批或已申报登记并领取相关许可证），专门从事表演艺术等活动的各类专业艺术表演团体，含民间职业剧团。不包括群众业余文艺表演团体。更多数据：搜索“马克数据网”来源：www.macrodatas.cn		2.6	2.33	2.48	2.4	3.36	3.88	5.96	8.34	5.58	4.62	7.31
630000	青海	0	101.78	36.6209	文化	艺术表演团体演出场次	文化-艺术表演团体、艺术表演场馆演出情况-艺术表演团体演出场次	万场次	艺术表演团体指由文化部门主办或实行行业管理（经文化行政部门审批或已申报登记并领取相关许可证），专门从事表演艺术等活动的各类专业艺术表演团体，含民间职业剧团。不包括群众业余文艺表演团体。关注公众号“马 克 数 据 网”		0.41	0.49	0.31	0.32	0.35	0.68	0.39	0.58	0.52	0.48	1.52
230000	黑龙江	0	126.662	45.7423	文化	艺术表演团体演出场次	文化-艺术表演团体、艺术表演场馆演出情况-艺术表演团体演出场次	万场次	艺术表演团体指由文化部门主办或实行行业管理（经文化行政部门审批或已申报登记并领取相关许可证），专门从事表演艺术等活动的各类专业艺术表演团体，含民间职业剧团。不包括群众业余文艺表演团体。来自：www.macrodatas.cn		1.12	0.85	0.5	0.57	0.78	0.64	0.78	1.37	1.36	0.5	0.65
310000	上海	1	121.474	31.2304	文化	艺术表演团体国内演出场次	文化-艺术表演团体、艺术表演场馆演出情况-艺术表演团体国内演出场次	千场次	艺术表演团体指由文化部门主办或实行行业管理（经文化行政部门审批或已申报登记并领取相关许可证），专门从事表演艺术等活动的各类专业艺术表演团体，含民间职业剧团。不包括群众业余文艺表演团体。来源：百度“马 克 数据网”	19.76	21.36	35.74	33.91	27.8	28.73	22.93	26.14	35.4	72.7	17.5	28
530000	云南	1	102.71	25.0458	文化	艺术表演团体国内演出场次	文化-艺术表演团体、艺术表演场馆演出情况-艺术表演团体国内演出场次	千场次	艺术表演团体指由文化部门主办或实行行业管理（经文化行政部门审批或已申报登记并领取相关许可证），专门从事表演艺术等活动的各类专业艺术表演团体，含民间职业剧团。不包括群众业余文艺表演团体。来自马克数据网	15.4	17	24.59	38.23	52.84	45.19	44.01	55.68	49.4	75.6	50.4	24.3
150000	内蒙古	0	111.766	40.8175	文化	艺术表演团体国内演出场次	文化-艺术表演团体、艺术表演场馆演出情况-艺术表演团体国内演出场次	千场次	艺术表演团体指由文化部门主办或实行行业管理（经文化行政部门审批或已申报登记并领取相关许可证），专门从事表演艺术等活动的各类专业艺术表演团体，含民间职业剧团。不包括群众业余文艺表演团体。来自：www.macrodatas.cn	18.25	19.85	19.71	25.49	24.06	38.75	24.39	28.57	30.9	33.3	19.3	18.4
110000	北京	0	116.408	39.904	文化	艺术表演团体国内演出场次	文化-艺术表演团体、艺术表演场馆演出情况-艺术表演团体国内演出场次	千场次	艺术表演团体指由文化部门主办或实行行业管理（经文化行政部门审批或已申报登记并领取相关许可证），专门从事表演艺术等活动的各类专业艺术表演团体，含民间职业剧团。不包括群众业余文艺表演团体。来源：百度“马 克 数据网”	6.84	12.12	20.84	21.7	22.3	27.04	26.15	60.22	24.8	23.6	12.2	22.9
220000	吉林	0	125.326	43.8965	文化	艺术表演团体国内演出场次	文化-艺术表演团体、艺术表演场馆演出情况-艺术表演团体国内演出场次	千场次	艺术表演团体指由文化部门主办或实行行业管理（经文化行政部门审批或已申报登记并领取相关许可证），专门从事表演艺术等活动的各类专业艺术表演团体，含民间职业剧团。不包括群众业余文艺表演团体。来源：百度“马 克 数据网”	8.06	8.33	5.33	6.36	5.67	5.72	5.53	6.46	12.2	6.5	4.7	6.1
510000	四川	1	104.076	30.6517	文化	艺术表演团体国内演出场次	文化-艺术表演团体、艺术表演场馆演出情况-艺术表演团体国内演出场次	千场次	艺术表演团体指由文化部门主办或实行行业管理（经文化行政部门审批或已申报登记并领取相关许可证），专门从事表演艺术等活动的各类专业艺术表演团体，含民间职业剧团。不包括群众业余文艺表演团体。微信公众号“马克 数据网”	50.56	56.45	62.43	75.86	63.71	102.45	83.89	77.02	108.7	61.1	36.4	45
120000	天津	0	117.201	39.0842	文化	艺术表演团体国内演出场次	文化-艺术表演团体、艺术表演场馆演出情况-艺术表演团体国内演出场次	千场次	艺术表演团体指由文化部门主办或实行行业管理（经文化行政部门审批或已申报登记并领取相关许可证），专门从事表演艺术等活动的各类专业艺术表演团体，含民间职业剧团。不包括群众业余文艺表演团体。来源：百度“马 克 数据网”	3.79	4.08	4.69	6.86	10.88	17.23	7.75	9.02	11	9.2	5	10
640000	宁夏	0	106.259	38.4713	文化	艺术表演团体国内演出场次	文化-艺术表演团体、艺术表演场馆演出情况-艺术表演团体国内演出场次	千场次	艺术表演团体指由文化部门主办或实行行业管理（经文化行政部门审批或已申报登记并领取相关许可证），专门从事表演艺术等活动的各类专业艺术表演团体，含民间职业剧团。不包括群众业余文艺表演团体。搜索“马 克 数 据 网”	4.67	5.82	2.95	8.6	14.1	6.12	5.25	17.42	7.6	4.9	2.9	3.7
340000	安徽	1	117.285	31.8612	文化	艺术表演团体国内演出场次	文化-艺术表演团体、艺术表演场馆演出情况-艺术表演团体国内演出场次	千场次	艺术表演团体指由文化部门主办或实行行业管理（经文化行政部门审批或已申报登记并领取相关许可证），专门从事表演艺术等活动的各类专业艺术表演团体，含民间职业剧团。不包括群众业余文艺表演团体。关注公众号“马 克 数 据 网”	389.39	145.25	237.33	316.55	288.96	390.38	458.27	581.67	504.7	346.4	301.2	407.4
370000	山东	0	117.02	36.6685	文化	艺术表演团体国内演出场次	文化-艺术表演团体、艺术表演场馆演出情况-艺术表演团体国内演出场次	千场次	艺术表演团体指由文化部门主办或实行行业管理（经文化行政部门审批或已申报登记并领取相关许可证），专门从事表演艺术等活动的各类专业艺术表演团体，含民间职业剧团。不包括群众业余文艺表演团体。更多数据：www.macrodatas.cn	19.98	31.12	35.53	53.12	164.06	132.57	83.34	108.17	222.6	136.3	139.6	179.2
140000	山西	0	112.562	37.8735	文化	艺术表演团体国内演出场次	文化-艺术表演团体、艺术表演场馆演出情况-艺术表演团体国内演出场次	千场次	艺术表演团体指由文化部门主办或实行行业管理（经文化行政部门审批或已申报登记并领取相关许可证），专门从事表演艺术等活动的各类专业艺术表演团体，含民间职业剧团。不包括群众业余文艺表演团体。来源：马 克 数 据 网	52.29	51.99	48.38	38.88	53.59	60.7	92.13	101.57	95.1	97	61.4	212.7
440000	广东	0	113.267	23.1322	文化	艺术表演团体国内演出场次	文化-艺术表演团体、艺术表演场馆演出情况-艺术表演团体国内演出场次	千场次	艺术表演团体指由文化部门主办或实行行业管理（经文化行政部门审批或已申报登记并领取相关许可证），专门从事表演艺术等活动的各类专业艺术表演团体，含民间职业剧团。不包括群众业余文艺表演团体。微信公众号“马克 数据网”	41.52	52.71	39.14	42.04	46.37	40.91	38.39	41.18	45.9	46.2	33.8	89.1
450000	广西	0	108.328	22.8155	文化	艺术表演团体国内演出场次	文化-艺术表演团体、艺术表演场馆演出情况-艺术表演团体国内演出场次	千场次	艺术表演团体指由文化部门主办或实行行业管理（经文化行政部门审批或已申报登记并领取相关许可证），专门从事表演艺术等活动的各类专业艺术表演团体，含民间职业剧团。不包括群众业余文艺表演团体。来源：马 克 数 据 网	14.93	11.86	11.07	14.62	8.97	13.17	11.47	14.33	17	18.4	9.4	8.8
650000	新疆	0	87.6277	43.793	文化	艺术表演团体国内演出场次	文化-艺术表演团体、艺术表演场馆演出情况-艺术表演团体国内演出场次	千场次	艺术表演团体指由文化部门主办或实行行业管理（经文化行政部门审批或已申报登记并领取相关许可证），专门从事表演艺术等活动的各类专业艺术表演团体，含民间职业剧团。不包括群众业余文艺表演团体。关注公众号“马克数据网”	15.15	14.27	18.07	14.02	16.41	17.21	16.35	16.09	18.2	36.6	20.6	15.6
320000	江苏	1	118.763	32.0617	文化	艺术表演团体国内演出场次	文化-艺术表演团体、艺术表演场馆演出情况-艺术表演团体国内演出场次	千场次	艺术表演团体指由文化部门主办或实行行业管理（经文化行政部门审批或已申报登记并领取相关许可证），专门从事表演艺术等活动的各类专业艺术表演团体，含民间职业剧团。不包括群众业余文艺表演团体。搜索“马 克 数 据 网”	74.86	83.71	100.78	77.34	61.17	85.14	87.17	103.55	100	120.7	74	98.8
360000	江西	1	115.909	28.6757	文化	艺术表演团体国内演出场次	文化-艺术表演团体、艺术表演场馆演出情况-艺术表演团体国内演出场次	千场次	艺术表演团体指由文化部门主办或实行行业管理（经文化行政部门审批或已申报登记并领取相关许可证），专门从事表演艺术等活动的各类专业艺术表演团体，含民间职业剧团。不包括群众业余文艺表演团体。百度搜索“马 克 数 据 网”	18.56	18.83	27.6	50.58	33.92	29.89	46.99	66.33	76.8	43.2	47.6	68.2
130000	河北	0	114.469	38.0371	文化	艺术表演团体国内演出场次	文化-艺术表演团体、艺术表演场馆演出情况-艺术表演团体国内演出场次	千场次	艺术表演团体指由文化部门主办或实行行业管理（经文化行政部门审批或已申报登记并领取相关许可证），专门从事表演艺术等活动的各类专业艺术表演团体，含民间职业剧团。不包括群众业余文艺表演团体。搜索“马 克 数 据 网”	46.98	43.9	56.9	69.68	76.31	81.22	90.09	94.87	98.4	91.9	79.8	42.4
410000	河南	0	113.754	34.7655	文化	艺术表演团体国内演出场次	文化-艺术表演团体、艺术表演场馆演出情况-艺术表演团体国内演出场次	千场次	艺术表演团体指由文化部门主办或实行行业管理（经文化行政部门审批或已申报登记并领取相关许可证），专门从事表演艺术等活动的各类专业艺术表演团体，含民间职业剧团。不包括群众业余文艺表演团体。关注公众号“马 克 数 据 网”	76.02	128.57	83.9	260.6	206.1	355.95	462.47	646.61	392.1	389.5	305.7	229
330000	浙江	1	120.153	30.2674	文化	艺术表演团体国内演出场次	文化-艺术表演团体、艺术表演场馆演出情况-艺术表演团体国内演出场次	千场次	艺术表演团体指由文化部门主办或实行行业管理（经文化行政部门审批或已申报登记并领取相关许可证），专门从事表演艺术等活动的各类专业艺术表演团体，含民间职业剧团。不包括群众业余文艺表演团体。更多数据：搜索“马克数据网”来源：www.macrodatas.cn	102.25	128.49	132.07	145.31	182.42	217.7	288.44	370.24	378.3	375	203.8	265.1
460000	海南	0	110.349	20.0174	文化	艺术表演团体国内演出场次	文化-艺术表演团体、艺术表演场馆演出情况-艺术表演团体国内演出场次	千场次	艺术表演团体指由文化部门主办或实行行业管理（经文化行政部门审批或已申报登记并领取相关许可证），专门从事表演艺术等活动的各类专业艺术表演团体，含民间职业剧团。不包括群众业余文艺表演团体。马 克 数 据 网	8.41	8	5.9	9.46	9.66	7.64	8.85	10.73	9.3	11.1	11.5	9.1
420000	湖北	1	114.342	30.5465	文化	艺术表演团体国内演出场次	文化-艺术表演团体、艺术表演场馆演出情况-艺术表演团体国内演出场次	千场次	艺术表演团体指由文化部门主办或实行行业管理（经文化行政部门审批或已申报登记并领取相关许可证），专门从事表演艺术等活动的各类专业艺术表演团体，含民间职业剧团。不包括群众业余文艺表演团体。更多数据：搜索“马克数据网”来源：www.macrodatas.cn	35.68	39.19	34.14	36.89	38.23	37.67	37.79	64.3	366	50.5	82.2	37.8
430000	湖南	1	112.984	28.1124	文化	艺术表演团体国内演出场次	文化-艺术表演团体、艺术表演场馆演出情况-艺术表演团体国内演出场次	千场次	艺术表演团体指由文化部门主办或实行行业管理（经文化行政部门审批或已申报登记并领取相关许可证），专门从事表演艺术等活动的各类专业艺术表演团体，含民间职业剧团。不包括群众业余文艺表演团体。微信公众号“马克 数据网”	31.85	20.33	26.97	35.25	49.05	65.47	54.79	59.81	57.1	406.9	68.4	97.5
620000	甘肃	0	103.826	36.0594	文化	艺术表演团体国内演出场次	文化-艺术表演团体、艺术表演场馆演出情况-艺术表演团体国内演出场次	千场次	艺术表演团体指由文化部门主办或实行行业管理（经文化行政部门审批或已申报登记并领取相关许可证），专门从事表演艺术等活动的各类专业艺术表演团体，含民间职业剧团。不包括群众业余文艺表演团体。来源：马 克 数 据 网	15.97	16.2	19.45	19.19	22.12	22.7	31.18	29.11	40.5	34.8	326.2	71
350000	福建	0	119.295	26.1008	文化	艺术表演团体国内演出场次	文化-艺术表演团体、艺术表演场馆演出情况-艺术表演团体国内演出场次	千场次	艺术表演团体指由文化部门主办或实行行业管理（经文化行政部门审批或已申报登记并领取相关许可证），专门从事表演艺术等活动的各类专业艺术表演团体，含民间职业剧团。不包括群众业余文艺表演团体。更多数据：搜索“马克数据网”来源：www.macrodatas.cn	94.66	434.57	103.79	109.98	108	85.29	85.61	76.65	81.1	85.6	97.4	74.8
540000	西藏	0	91.1172	29.6469	文化	艺术表演团体国内演出场次	文化-艺术表演团体、艺术表演场馆演出情况-艺术表演团体国内演出场次	千场次	艺术表演团体指由文化部门主办或实行行业管理（经文化行政部门审批或已申报登记并领取相关许可证），专门从事表演艺术等活动的各类专业艺术表演团体，含民间职业剧团。不包括群众业余文艺表演团体。百度搜索“马 克 数 据 网”	2.24	2.48	8.05	3.67	4.52	5.5	5.53	5.59	5.9	6.5	6.4	6.2
520000	贵州	1	106.707	26.5982	文化	艺术表演团体国内演出场次	文化-艺术表演团体、艺术表演场馆演出情况-艺术表演团体国内演出场次	千场次	艺术表演团体指由文化部门主办或实行行业管理（经文化行政部门审批或已申报登记并领取相关许可证），专门从事表演艺术等活动的各类专业艺术表演团体，含民间职业剧团。不包括群众业余文艺表演团体。搜索“马 克 数 据 网”	4.69	4.78	10.34	15.14	8.81	7.56	10.52	14.56	12.7	20.9	14.4	17.1
210000	辽宁	0	123.429	41.8354	文化	艺术表演团体国内演出场次	文化-艺术表演团体、艺术表演场馆演出情况-艺术表演团体国内演出场次	千场次	艺术表演团体指由文化部门主办或实行行业管理（经文化行政部门审批或已申报登记并领取相关许可证），专门从事表演艺术等活动的各类专业艺术表演团体，含民间职业剧团。不包括群众业余文艺表演团体。关注公众号“马 克 数 据 网”	16.06	6.22	12.46	16.34	15.06	23.42	17.41	11.8	13.1	78.1	8.5	12.8
500000	重庆	1	106.552	29.563	文化	艺术表演团体国内演出场次	文化-艺术表演团体、艺术表演场馆演出情况-艺术表演团体国内演出场次	千场次	艺术表演团体指由文化部门主办或实行行业管理（经文化行政部门审批或已申报登记并领取相关许可证），专门从事表演艺术等活动的各类专业艺术表演团体，含民间职业剧团。不包括群众业余文艺表演团体。关注公众号“马 克 数 据 网”	52.78	35.95	23.71	47.38	61.17	94.99	89.85	151.45	189.3	197.6	129.2	123.9
610000	陕西	0	108.954	34.2655	文化	艺术表演团体国内演出场次	文化-艺术表演团体、艺术表演场馆演出情况-艺术表演团体国内演出场次	千场次	艺术表演团体指由文化部门主办或实行行业管理（经文化行政部门审批或已申报登记并领取相关许可证），专门从事表演艺术等活动的各类专业艺术表演团体，含民间职业剧团。不包括群众业余文艺表演团体。来源：百度搜索“马克数据网”	20.48	24.56	22.69	24.35	23.19	33.16	38.43	59.12	82.8	55.4	46.1	72.9
630000	青海	0	101.78	36.6209	文化	艺术表演团体国内演出场次	文化-艺术表演团体、艺术表演场馆演出情况-艺术表演团体国内演出场次	千场次	艺术表演团体指由文化部门主办或实行行业管理（经文化行政部门审批或已申报登记并领取相关许可证），专门从事表演艺术等活动的各类专业艺术表演团体，含民间职业剧团。不包括群众业余文艺表演团体。来源：百度“马 克 数据网”	3.19	3.88	4.78	2.85	3.04	3.28	6.61	3.46	5.3	4.9	4.7	15.1
230000	黑龙江	0	126.662	45.7423	文化	艺术表演团体国内演出场次	文化-艺术表演团体、艺术表演场馆演出情况-艺术表演团体国内演出场次	千场次	艺术表演团体指由文化部门主办或实行行业管理（经文化行政部门审批或已申报登记并领取相关许可证），专门从事表演艺术等活动的各类专业艺术表演团体，含民间职业剧团。不包括群众业余文艺表演团体。更多数据：www.macrodatas.cn	8.91	10.1	7.91	4.73	4.92	7.08	5.94	7.05	13.2	13.3	5	6.5
310000	上海	1	121.474	31.2304	文化	艺术表演团体国内演出观众人次	文化-艺术表演团体、艺术表演场馆演出情况-艺术表演团体国内演出观众人次	千人次	艺术表演团体指由文化部门主办或实行行业管理（经文化行政部门审批或已申报登记并领取相关许可证），专门从事表演艺术等活动的各类专业艺术表演团体，含民间职业剧团。不包括群众业余文艺表演团体。来自：www.macrodatas.cn	10367	10424	15145	11750	10171	8629	10344	9689	10970	12250	5591	14109
530000	云南	1	102.71	25.0458	文化	艺术表演团体国内演出观众人次	文化-艺术表演团体、艺术表演场馆演出情况-艺术表演团体国内演出观众人次	千人次	艺术表演团体指由文化部门主办或实行行业管理（经文化行政部门审批或已申报登记并领取相关许可证），专门从事表演艺术等活动的各类专业艺术表演团体，含民间职业剧团。不包括群众业余文艺表演团体。关注公众号“马 克 数 据 网”	17407	15498	22270	23253	26056	19400	38832	28546	25700	35390	15981	14057
150000	内蒙古	0	111.766	40.8175	文化	艺术表演团体国内演出观众人次	文化-艺术表演团体、艺术表演场馆演出情况-艺术表演团体国内演出观众人次	千人次	艺术表演团体指由文化部门主办或实行行业管理（经文化行政部门审批或已申报登记并领取相关许可证），专门从事表演艺术等活动的各类专业艺术表演团体，含民间职业剧团。不包括群众业余文艺表演团体。来源：马 克 数 据 网	16232	14717	20400	13731	17793	11235	12411	16019	16110	22380	10433	6768
110000	北京	0	116.408	39.904	文化	艺术表演团体国内演出观众人次	文化-艺术表演团体、艺术表演场馆演出情况-艺术表演团体国内演出观众人次	千人次	艺术表演团体指由文化部门主办或实行行业管理（经文化行政部门审批或已申报登记并领取相关许可证），专门从事表演艺术等活动的各类专业艺术表演团体，含民间职业剧团。不包括群众业余文艺表演团体。关注公众号“马 克 数 据 网”	4296	7232	10081	9830	10261	10852	8770	11007	9150	8030	26421	11855
220000	吉林	0	125.326	43.8965	文化	艺术表演团体国内演出观众人次	文化-艺术表演团体、艺术表演场馆演出情况-艺术表演团体国内演出观众人次	千人次	艺术表演团体指由文化部门主办或实行行业管理（经文化行政部门审批或已申报登记并领取相关许可证），专门从事表演艺术等活动的各类专业艺术表演团体，含民间职业剧团。不包括群众业余文艺表演团体。关注微信公众号“马克数据网”	8859	8936	5913	4242	5027	3719	3583	4263	3670	3480	3685	3868
510000	四川	1	104.076	30.6517	文化	艺术表演团体国内演出观众人次	文化-艺术表演团体、艺术表演场馆演出情况-艺术表演团体国内演出观众人次	千人次	艺术表演团体指由文化部门主办或实行行业管理（经文化行政部门审批或已申报登记并领取相关许可证），专门从事表演艺术等活动的各类专业艺术表演团体，含民间职业剧团。不包括群众业余文艺表演团体。来源：马 克 数 据 网	33039	27876	39631	125414	18873	20118	23037	25411	23400	26420	14313	148905
120000	天津	0	117.201	39.0842	文化	艺术表演团体国内演出观众人次	文化-艺术表演团体、艺术表演场馆演出情况-艺术表演团体国内演出观众人次	千人次	艺术表演团体指由文化部门主办或实行行业管理（经文化行政部门审批或已申报登记并领取相关许可证），专门从事表演艺术等活动的各类专业艺术表演团体，含民间职业剧团。不包括群众业余文艺表演团体。更多数据：搜索“马克数据网”来源：www.macrodatas.cn	3183	2866	2315	2849	4184	6726	3975	4651	3640	3960	7787	2335
640000	宁夏	0	106.259	38.4713	文化	艺术表演团体国内演出观众人次	文化-艺术表演团体、艺术表演场馆演出情况-艺术表演团体国内演出观众人次	千人次	艺术表演团体指由文化部门主办或实行行业管理（经文化行政部门审批或已申报登记并领取相关许可证），专门从事表演艺术等活动的各类专业艺术表演团体，含民间职业剧团。不包括群众业余文艺表演团体。关注公众号“马 克 数 据 网”	5975	5265	3131	5958	4143	4926	3599	3885	2800	3000	1351	1726
340000	安徽	1	117.285	31.8612	文化	艺术表演团体国内演出观众人次	文化-艺术表演团体、艺术表演场馆演出情况-艺术表演团体国内演出观众人次	千人次	艺术表演团体指由文化部门主办或实行行业管理（经文化行政部门审批或已申报登记并领取相关许可证），专门从事表演艺术等活动的各类专业艺术表演团体，含民间职业剧团。不包括群众业余文艺表演团体。更多数据：www.macrodatas.cn	107864	118211	69320	85781	140957	106862	329685	253306	199600	133980	95551	61191
370000	山东	0	117.02	36.6685	文化	艺术表演团体国内演出观众人次	文化-艺术表演团体、艺术表演场馆演出情况-艺术表演团体国内演出观众人次	千人次	艺术表演团体指由文化部门主办或实行行业管理（经文化行政部门审批或已申报登记并领取相关许可证），专门从事表演艺术等活动的各类专业艺术表演团体，含民间职业剧团。不包括群众业余文艺表演团体。来源：百度“马 克 数据网”	25382	25189	24515	36022	37466	38716	40935	48382	52560	70560	150847	62345
140000	山西	0	112.562	37.8735	文化	艺术表演团体国内演出观众人次	文化-艺术表演团体、艺术表演场馆演出情况-艺术表演团体国内演出观众人次	千人次	艺术表演团体指由文化部门主办或实行行业管理（经文化行政部门审批或已申报登记并领取相关许可证），专门从事表演艺术等活动的各类专业艺术表演团体，含民间职业剧团。不包括群众业余文艺表演团体。关注公众号“马克数据网”	57550	42830	52588	37008	35921	39515	46422	56927	48480	52100	35891	39750
440000	广东	0	113.267	23.1322	文化	艺术表演团体国内演出观众人次	文化-艺术表演团体、艺术表演场馆演出情况-艺术表演团体国内演出观众人次	千人次	艺术表演团体指由文化部门主办或实行行业管理（经文化行政部门审批或已申报登记并领取相关许可证），专门从事表演艺术等活动的各类专业艺术表演团体，含民间职业剧团。不包括群众业余文艺表演团体。来自：www.macrodatas.cn	56089	44195	90822	46005	27417	21420	24273	23501	25220	26010	16899	45385
450000	广西	0	108.328	22.8155	文化	艺术表演团体国内演出观众人次	文化-艺术表演团体、艺术表演场馆演出情况-艺术表演团体国内演出观众人次	千人次	艺术表演团体指由文化部门主办或实行行业管理（经文化行政部门审批或已申报登记并领取相关许可证），专门从事表演艺术等活动的各类专业艺术表演团体，含民间职业剧团。不包括群众业余文艺表演团体。更多数据：www.macrodatas.cn	15076	12073	7579	8818	6639	18240	8484	9732	11180	10390	5056	2590
650000	新疆	0	87.6277	43.793	文化	艺术表演团体国内演出观众人次	文化-艺术表演团体、艺术表演场馆演出情况-艺术表演团体国内演出观众人次	千人次	艺术表演团体指由文化部门主办或实行行业管理（经文化行政部门审批或已申报登记并领取相关许可证），专门从事表演艺术等活动的各类专业艺术表演团体，含民间职业剧团。不包括群众业余文艺表演团体。百度搜索“马 克 数 据 网”	10524	10002	9934	8657	9231	12069	11902	10937	10620	12650	3323	5374
320000	江苏	1	118.763	32.0617	文化	艺术表演团体国内演出观众人次	文化-艺术表演团体、艺术表演场馆演出情况-艺术表演团体国内演出观众人次	千人次	艺术表演团体指由文化部门主办或实行行业管理（经文化行政部门审批或已申报登记并领取相关许可证），专门从事表演艺术等活动的各类专业艺术表演团体，含民间职业剧团。不包括群众业余文艺表演团体。关注公众号“马 克 数 据 网”	39406	31078	37689	26631	26059	28091	40511	37240	35460	46830	31149	30691
360000	江西	1	115.909	28.6757	文化	艺术表演团体国内演出观众人次	文化-艺术表演团体、艺术表演场馆演出情况-艺术表演团体国内演出观众人次	千人次	艺术表演团体指由文化部门主办或实行行业管理（经文化行政部门审批或已申报登记并领取相关许可证），专门从事表演艺术等活动的各类专业艺术表演团体，含民间职业剧团。不包括群众业余文艺表演团体。百度搜索“马 克 数 据 网”	15849	20019	26576	23792	22389	15438	16250	31341	23260	31250	19047	14063
130000	河北	0	114.469	38.0371	文化	艺术表演团体国内演出观众人次	文化-艺术表演团体、艺术表演场馆演出情况-艺术表演团体国内演出观众人次	千人次	艺术表演团体指由文化部门主办或实行行业管理（经文化行政部门审批或已申报登记并领取相关许可证），专门从事表演艺术等活动的各类专业艺术表演团体，含民间职业剧团。不包括群众业余文艺表演团体。关注公众号“马克数据网”	49482	33794	57335	51828	53697	45590	54186	55014	33160	68540	33415	19234
410000	河南	0	113.754	34.7655	文化	艺术表演团体国内演出观众人次	文化-艺术表演团体、艺术表演场馆演出情况-艺术表演团体国内演出观众人次	千人次	艺术表演团体指由文化部门主办或实行行业管理（经文化行政部门审批或已申报登记并领取相关许可证），专门从事表演艺术等活动的各类专业艺术表演团体，含民间职业剧团。不包括群众业余文艺表演团体。百度搜索“马 克 数 据 网”	84058	74206	77508	91224	111102	194157	119943	150480	153490	201740	123515	117480
330000	浙江	1	120.153	30.2674	文化	艺术表演团体国内演出观众人次	文化-艺术表演团体、艺术表演场馆演出情况-艺术表演团体国内演出观众人次	千人次	艺术表演团体指由文化部门主办或实行行业管理（经文化行政部门审批或已申报登记并领取相关许可证），专门从事表演艺术等活动的各类专业艺术表演团体，含民间职业剧团。不包括群众业余文艺表演团体。更多数据：www.macrodatas.cn	105733	50915	86244	92721	146696	153367	180405	209732	207880	182610	69664	59473
460000	海南	0	110.349	20.0174	文化	艺术表演团体国内演出观众人次	文化-艺术表演团体、艺术表演场馆演出情况-艺术表演团体国内演出观众人次	千人次	艺术表演团体指由文化部门主办或实行行业管理（经文化行政部门审批或已申报登记并领取相关许可证），专门从事表演艺术等活动的各类专业艺术表演团体，含民间职业剧团。不包括群众业余文艺表演团体。微信公众号“马克 数据网”	6825	6075	4130	9723	16730	7012	8112	9407	7160	10960	8842	2377
420000	湖北	1	114.342	30.5465	文化	艺术表演团体国内演出观众人次	文化-艺术表演团体、艺术表演场馆演出情况-艺术表演团体国内演出观众人次	千人次	艺术表演团体指由文化部门主办或实行行业管理（经文化行政部门审批或已申报登记并领取相关许可证），专门从事表演艺术等活动的各类专业艺术表演团体，含民间职业剧团。不包括群众业余文艺表演团体。百度搜索“马 克 数 据 网”	38923	30178	30144	28801	33444	29017	30518	41507	44260	60490	60672	27398
430000	湖南	1	112.984	28.1124	文化	艺术表演团体国内演出观众人次	文化-艺术表演团体、艺术表演场馆演出情况-艺术表演团体国内演出观众人次	千人次	艺术表演团体指由文化部门主办或实行行业管理（经文化行政部门审批或已申报登记并领取相关许可证），专门从事表演艺术等活动的各类专业艺术表演团体，含民间职业剧团。不包括群众业余文艺表演团体。关注公众号“马克数据网”	21736	14429	15838	17749	17117	19114	24431	24881	22480	26400	32315	66283
620000	甘肃	0	103.826	36.0594	文化	艺术表演团体国内演出观众人次	文化-艺术表演团体、艺术表演场馆演出情况-艺术表演团体国内演出观众人次	千人次	艺术表演团体指由文化部门主办或实行行业管理（经文化行政部门审批或已申报登记并领取相关许可证），专门从事表演艺术等活动的各类专业艺术表演团体，含民间职业剧团。不包括群众业余文艺表演团体。来源：百度“马 克 数据网”	22992	20199	19089	21900	21499	20342	27749	33781	32590	26480	16812	35873
350000	福建	0	119.295	26.1008	文化	艺术表演团体国内演出观众人次	文化-艺术表演团体、艺术表演场馆演出情况-艺术表演团体国内演出观众人次	千人次	艺术表演团体指由文化部门主办或实行行业管理（经文化行政部门审批或已申报登记并领取相关许可证），专门从事表演艺术等活动的各类专业艺术表演团体，含民间职业剧团。不包括群众业余文艺表演团体。关注微信公众号“马克数据网”	41002	51208	32111	41565	41824	27601	22859	26614	34040	42950	33720	30104
540000	西藏	0	91.1172	29.6469	文化	艺术表演团体国内演出观众人次	文化-艺术表演团体、艺术表演场馆演出情况-艺术表演团体国内演出观众人次	千人次	艺术表演团体指由文化部门主办或实行行业管理（经文化行政部门审批或已申报登记并领取相关许可证），专门从事表演艺术等活动的各类专业艺术表演团体，含民间职业剧团。不包括群众业余文艺表演团体。更多数据：搜索“马克数据网”来源：www.macrodatas.cn	3803	2064	2243	2573	4116	3898	3907	4281	4400	5490	3657	3272
520000	贵州	1	106.707	26.5982	文化	艺术表演团体国内演出观众人次	文化-艺术表演团体、艺术表演场馆演出情况-艺术表演团体国内演出观众人次	千人次	艺术表演团体指由文化部门主办或实行行业管理（经文化行政部门审批或已申报登记并领取相关许可证），专门从事表演艺术等活动的各类专业艺术表演团体，含民间职业剧团。不包括群众业余文艺表演团体。关注微信公众号“马克数据网”	5677	4236	6643	12295	6114	6825	8174	27126	12310	11270	5807	15255
210000	辽宁	0	123.429	41.8354	文化	艺术表演团体国内演出观众人次	文化-艺术表演团体、艺术表演场馆演出情况-艺术表演团体国内演出观众人次	千人次	艺术表演团体指由文化部门主办或实行行业管理（经文化行政部门审批或已申报登记并领取相关许可证），专门从事表演艺术等活动的各类专业艺术表演团体，含民间职业剧团。不包括群众业余文艺表演团体。微信公众号“马克 数据网”	8110	4617	7920	8507	8262	9056	5652	5179	8190	8360	4736	5147
500000	重庆	1	106.552	29.563	文化	艺术表演团体国内演出观众人次	文化-艺术表演团体、艺术表演场馆演出情况-艺术表演团体国内演出观众人次	千人次	艺术表演团体指由文化部门主办或实行行业管理（经文化行政部门审批或已申报登记并领取相关许可证），专门从事表演艺术等活动的各类专业艺术表演团体，含民间职业剧团。不包括群众业余文艺表演团体。来源：百度“马 克 数据网”	20968	15310	11760	14099	15575	22225	30806	33710	51430	29760	17341	23943
610000	陕西	0	108.954	34.2655	文化	艺术表演团体国内演出观众人次	文化-艺术表演团体、艺术表演场馆演出情况-艺术表演团体国内演出观众人次	千人次	艺术表演团体指由文化部门主办或实行行业管理（经文化行政部门审批或已申报登记并领取相关许可证），专门从事表演艺术等活动的各类专业艺术表演团体，含民间职业剧团。不包括群众业余文艺表演团体。更多数据：搜索“马克数据网”来源：www.macrodatas.cn	30934	21688	24183	26812	21101	43224	32413	42516	49380	47200	31742	42977
630000	青海	0	101.78	36.6209	文化	艺术表演团体国内演出观众人次	文化-艺术表演团体、艺术表演场馆演出情况-艺术表演团体国内演出观众人次	千人次	艺术表演团体指由文化部门主办或实行行业管理（经文化行政部门审批或已申报登记并领取相关许可证），专门从事表演艺术等活动的各类专业艺术表演团体，含民间职业剧团。不包括群众业余文艺表演团体。微信公众号“马克 数据网”	2260	2754	4142	1635	2613	3333	2844	2448	4240	2130	1736	11095
230000	黑龙江	0	126.662	45.7423	文化	艺术表演团体国内演出观众人次	文化-艺术表演团体、艺术表演场馆演出情况-艺术表演团体国内演出观众人次	千人次	艺术表演团体指由文化部门主办或实行行业管理（经文化行政部门审批或已申报登记并领取相关许可证），专门从事表演艺术等活动的各类专业艺术表演团体，含民间职业剧团。不包括群众业余文艺表演团体。来源：百度搜索“马克数据网”	8184	8285	7216	4044	3107	3276	3319	3326	5870	4170	1432	2287
310000	上海	1	121.474	31.2304	文化	艺术表演场馆机构数	文化-艺术表演团体、艺术表演场馆演出情况-艺术表演场馆机构数	个	艺术表演场馆指由文化部门主办或实行行业管理（经文化市场行政部门审批或已申报登记并领取相关许可证），有观众席、舞台、灯光设备，公开售票、专供文艺团体演出的文化活动场所。2007年以前艺术表演团体和艺术表演场馆为文化系统内数据，2007年起含非文化部门数据。搜索“马 克 数 据 网”	96	103	117	27	24	50	47	49	45	50	61	83
530000	云南	1	102.71	25.0458	文化	艺术表演场馆机构数	文化-艺术表演团体、艺术表演场馆演出情况-艺术表演场馆机构数	个	艺术表演场馆指由文化部门主办或实行行业管理（经文化市场行政部门审批或已申报登记并领取相关许可证），有观众席、舞台、灯光设备，公开售票、专供文艺团体演出的文化活动场所。2007年以前艺术表演团体和艺术表演场馆为文化系统内数据，2007年起含非文化部门数据。马 克 数 据 网	36	27	60	18	17	40	30	45	27	50	34	50
150000	内蒙古	0	111.766	40.8175	文化	艺术表演场馆机构数	文化-艺术表演团体、艺术表演场馆演出情况-艺术表演场馆机构数	个	艺术表演场馆指由文化部门主办或实行行业管理（经文化市场行政部门审批或已申报登记并领取相关许可证），有观众席、舞台、灯光设备，公开售票、专供文艺团体演出的文化活动场所。2007年以前艺术表演团体和艺术表演场馆为文化系统内数据，2007年起含非文化部门数据。马 克 数 据 网	26	20	20	18	19	25	31	44	54	45	32	36
110000	北京	0	116.408	39.904	文化	艺术表演场馆机构数	文化-艺术表演团体、艺术表演场馆演出情况-艺术表演场馆机构数	个	艺术表演场馆指由文化部门主办或实行行业管理（经文化市场行政部门审批或已申报登记并领取相关许可证），有观众席、舞台、灯光设备，公开售票、专供文艺团体演出的文化活动场所。2007年以前艺术表演团体和艺术表演场馆为文化系统内数据，2007年起含非文化部门数据。微信公众号“马克 数据网”	73	68	96	17	17	54	69	66	61	52	55	64
220000	吉林	0	125.326	43.8965	文化	艺术表演场馆机构数	文化-艺术表演团体、艺术表演场馆演出情况-艺术表演场馆机构数	个	艺术表演场馆指由文化部门主办或实行行业管理（经文化市场行政部门审批或已申报登记并领取相关许可证），有观众席、舞台、灯光设备，公开售票、专供文艺团体演出的文化活动场所。2007年以前艺术表演团体和艺术表演场馆为文化系统内数据，2007年起含非文化部门数据。微信公众号“马克数据网”	32	29	37	26	28	49	50	56	58	70	85	104
510000	四川	1	104.076	30.6517	文化	艺术表演场馆机构数	文化-艺术表演团体、艺术表演场馆演出情况-艺术表演场馆机构数	个	艺术表演场馆指由文化部门主办或实行行业管理（经文化市场行政部门审批或已申报登记并领取相关许可证），有观众席、舞台、灯光设备，公开售票、专供文艺团体演出的文化活动场所。2007年以前艺术表演团体和艺术表演场馆为文化系统内数据，2007年起含非文化部门数据。关注公众号“马克数据网”	94	78	130	42	41	99	88	101	110	101	125	159
120000	天津	0	117.201	39.0842	文化	艺术表演场馆机构数	文化-艺术表演团体、艺术表演场馆演出情况-艺术表演场馆机构数	个	艺术表演场馆指由文化部门主办或实行行业管理（经文化市场行政部门审批或已申报登记并领取相关许可证），有观众席、舞台、灯光设备，公开售票、专供文艺团体演出的文化活动场所。2007年以前艺术表演团体和艺术表演场馆为文化系统内数据，2007年起含非文化部门数据。更多数据：www.macrodatas.cn	37	57	35	26	28	50	51	57	68	74	85	114
640000	宁夏	0	106.259	38.4713	文化	艺术表演场馆机构数	文化-艺术表演团体、艺术表演场馆演出情况-艺术表演场馆机构数	个	艺术表演场馆指由文化部门主办或实行行业管理（经文化市场行政部门审批或已申报登记并领取相关许可证），有观众席、舞台、灯光设备，公开售票、专供文艺团体演出的文化活动场所。2007年以前艺术表演团体和艺术表演场馆为文化系统内数据，2007年起含非文化部门数据。关注公众号“马克数据网”	15	6	7	3	3	3	6	3	6	3	3	6
340000	安徽	1	117.285	31.8612	文化	艺术表演场馆机构数	文化-艺术表演团体、艺术表演场馆演出情况-艺术表演场馆机构数	个	艺术表演场馆指由文化部门主办或实行行业管理（经文化市场行政部门审批或已申报登记并领取相关许可证），有观众席、舞台、灯光设备，公开售票、专供文艺团体演出的文化活动场所。2007年以前艺术表演团体和艺术表演场馆为文化系统内数据，2007年起含非文化部门数据。关注微信公众号“马克数据网”	60	67	72	48	48	76	88	91	107	107	100	106
370000	山东	0	117.02	36.6685	文化	艺术表演场馆机构数	文化-艺术表演团体、艺术表演场馆演出情况-艺术表演场馆机构数	个	艺术表演场馆指由文化部门主办或实行行业管理（经文化市场行政部门审批或已申报登记并领取相关许可证），有观众席、舞台、灯光设备，公开售票、专供文艺团体演出的文化活动场所。2007年以前艺术表演团体和艺术表演场馆为文化系统内数据，2007年起含非文化部门数据。搜索“马 克 数 据 网”	91	93	103	93	93	101	100	100	106	145	154	198
140000	山西	0	112.562	37.8735	文化	艺术表演场馆机构数	文化-艺术表演团体、艺术表演场馆演出情况-艺术表演场馆机构数	个	艺术表演场馆指由文化部门主办或实行行业管理（经文化市场行政部门审批或已申报登记并领取相关许可证），有观众席、舞台、灯光设备，公开售票、专供文艺团体演出的文化活动场所。2007年以前艺术表演团体和艺术表演场馆为文化系统内数据，2007年起含非文化部门数据。来源：百度搜索“马克数据网”	103	97	129	100	99	137	127	121	125	137	167	172
440000	广东	0	113.267	23.1322	文化	艺术表演场馆机构数	文化-艺术表演团体、艺术表演场馆演出情况-艺术表演场馆机构数	个	艺术表演场馆指由文化部门主办或实行行业管理（经文化市场行政部门审批或已申报登记并领取相关许可证），有观众席、舞台、灯光设备，公开售票、专供文艺团体演出的文化活动场所。2007年以前艺术表演团体和艺术表演场馆为文化系统内数据，2007年起含非文化部门数据。微信公众号“马克 数据网”	124	107	93	45	44	66	75	83	86	84	118	136
450000	广西	0	108.328	22.8155	文化	艺术表演场馆机构数	文化-艺术表演团体、艺术表演场馆演出情况-艺术表演场馆机构数	个	艺术表演场馆指由文化部门主办或实行行业管理（经文化市场行政部门审批或已申报登记并领取相关许可证），有观众席、舞台、灯光设备，公开售票、专供文艺团体演出的文化活动场所。2007年以前艺术表演团体和艺术表演场馆为文化系统内数据，2007年起含非文化部门数据。百度搜索“马 克 数 据 网”	24	26	20	19	17	29	34	38	57	63	48	34
650000	新疆	0	87.6277	43.793	文化	艺术表演场馆机构数	文化-艺术表演团体、艺术表演场馆演出情况-艺术表演场馆机构数	个	艺术表演场馆指由文化部门主办或实行行业管理（经文化市场行政部门审批或已申报登记并领取相关许可证），有观众席、舞台、灯光设备，公开售票、专供文艺团体演出的文化活动场所。2007年以前艺术表演团体和艺术表演场馆为文化系统内数据，2007年起含非文化部门数据。更多数据：www.macrodatas.cn	15	13	16	15	15	16	17	24	26	23	24	22
320000	江苏	1	118.763	32.0617	文化	艺术表演场馆机构数	文化-艺术表演团体、艺术表演场馆演出情况-艺术表演场馆机构数	个	艺术表演场馆指由文化部门主办或实行行业管理（经文化市场行政部门审批或已申报登记并领取相关许可证），有观众席、舞台、灯光设备，公开售票、专供文艺团体演出的文化活动场所。2007年以前艺术表演团体和艺术表演场馆为文化系统内数据，2007年起含非文化部门数据。搜索“马 克 数 据 网”	201	110	217	110	111	207	223	254	249	244	274	329
360000	江西	1	115.909	28.6757	文化	艺术表演场馆机构数	文化-艺术表演团体、艺术表演场馆演出情况-艺术表演场馆机构数	个	艺术表演场馆指由文化部门主办或实行行业管理（经文化市场行政部门审批或已申报登记并领取相关许可证），有观众席、舞台、灯光设备，公开售票、专供文艺团体演出的文化活动场所。2007年以前艺术表演团体和艺术表演场馆为文化系统内数据，2007年起含非文化部门数据。关注微信公众号“马克数据网”	57	55	73	51	49	57	57	61	57	89	77	82
130000	河北	0	114.469	38.0371	文化	艺术表演场馆机构数	文化-艺术表演团体、艺术表演场馆演出情况-艺术表演场馆机构数	个	艺术表演场馆指由文化部门主办或实行行业管理（经文化市场行政部门审批或已申报登记并领取相关许可证），有观众席、舞台、灯光设备，公开售票、专供文艺团体演出的文化活动场所。2007年以前艺术表演团体和艺术表演场馆为文化系统内数据，2007年起含非文化部门数据。来自：www.macrodatas.cn	113	113	138	77	77	108	112	96	81	112	100	128
410000	河南	0	113.754	34.7655	文化	艺术表演场馆机构数	文化-艺术表演团体、艺术表演场馆演出情况-艺术表演场馆机构数	个	艺术表演场馆指由文化部门主办或实行行业管理（经文化市场行政部门审批或已申报登记并领取相关许可证），有观众席、舞台、灯光设备，公开售票、专供文艺团体演出的文化活动场所。2007年以前艺术表演团体和艺术表演场馆为文化系统内数据，2007年起含非文化部门数据。更多数据：www.macrodatas.cn	150	144	145	139	140	150	150	157	155	191	198	222
330000	浙江	1	120.153	30.2674	文化	艺术表演场馆机构数	文化-艺术表演团体、艺术表演场馆演出情况-艺术表演场馆机构数	个	艺术表演场馆指由文化部门主办或实行行业管理（经文化市场行政部门审批或已申报登记并领取相关许可证），有观众席、舞台、灯光设备，公开售票、专供文艺团体演出的文化活动场所。2007年以前艺术表演团体和艺术表演场馆为文化系统内数据，2007年起含非文化部门数据。关注公众号“马 克 数 据 网”	242	223	271	61	62	308	326	365	336	358	313	273
460000	海南	0	110.349	20.0174	文化	艺术表演场馆机构数	文化-艺术表演团体、艺术表演场馆演出情况-艺术表演场馆机构数	个	艺术表演场馆指由文化部门主办或实行行业管理（经文化市场行政部门审批或已申报登记并领取相关许可证），有观众席、舞台、灯光设备，公开售票、专供文艺团体演出的文化活动场所。2007年以前艺术表演团体和艺术表演场馆为文化系统内数据，2007年起含非文化部门数据。马 克 数 据 网	10	14	13	7	7	11	16	17	15	30	20	44
420000	湖北	1	114.342	30.5465	文化	艺术表演场馆机构数	文化-艺术表演团体、艺术表演场馆演出情况-艺术表演场馆机构数	个	艺术表演场馆指由文化部门主办或实行行业管理（经文化市场行政部门审批或已申报登记并领取相关许可证），有观众席、舞台、灯光设备，公开售票、专供文艺团体演出的文化活动场所。2007年以前艺术表演团体和艺术表演场馆为文化系统内数据，2007年起含非文化部门数据。微信公众号“马克 数据网”	68	65	66	53	52	58	58	65	61	67	73	70
430000	湖南	1	112.984	28.1124	文化	艺术表演场馆机构数	文化-艺术表演团体、艺术表演场馆演出情况-艺术表演场馆机构数	个	艺术表演场馆指由文化部门主办或实行行业管理（经文化市场行政部门审批或已申报登记并领取相关许可证），有观众席、舞台、灯光设备，公开售票、专供文艺团体演出的文化活动场所。2007年以前艺术表演团体和艺术表演场馆为文化系统内数据，2007年起含非文化部门数据。关注公众号“马克数据网”	63	66	83	58	57	71	86	92	105	119	110	122
620000	甘肃	0	103.826	36.0594	文化	艺术表演场馆机构数	文化-艺术表演团体、艺术表演场馆演出情况-艺术表演场馆机构数	个	艺术表演场馆指由文化部门主办或实行行业管理（经文化市场行政部门审批或已申报登记并领取相关许可证），有观众席、舞台、灯光设备，公开售票、专供文艺团体演出的文化活动场所。2007年以前艺术表演团体和艺术表演场馆为文化系统内数据，2007年起含非文化部门数据。百度搜索“马 克 数 据 网”	27	24	25	22	22	24	48	45	44	42	36	55
350000	福建	0	119.295	26.1008	文化	艺术表演场馆机构数	文化-艺术表演团体、艺术表演场馆演出情况-艺术表演场馆机构数	个	艺术表演场馆指由文化部门主办或实行行业管理（经文化市场行政部门审批或已申报登记并领取相关许可证），有观众席、舞台、灯光设备，公开售票、专供文艺团体演出的文化活动场所。2007年以前艺术表演团体和艺术表演场馆为文化系统内数据，2007年起含非文化部门数据。来源：百度“马 克 数据网”	57	49	53	57	57	56	58	59	54	57	64	72
540000	西藏	0	91.1172	29.6469	文化	艺术表演场馆机构数	文化-艺术表演团体、艺术表演场馆演出情况-艺术表演场馆机构数	个	艺术表演场馆指由文化部门主办或实行行业管理（经文化市场行政部门审批或已申报登记并领取相关许可证），有观众席、舞台、灯光设备，公开售票、专供文艺团体演出的文化活动场所。2007年以前艺术表演团体和艺术表演场馆为文化系统内数据，2007年起含非文化部门数据。来源：马 克 数 据 网	21	21	22	14	14	14	14	15	14	15	25	27
520000	贵州	1	106.707	26.5982	文化	艺术表演场馆机构数	文化-艺术表演团体、艺术表演场馆演出情况-艺术表演场馆机构数	个	艺术表演场馆指由文化部门主办或实行行业管理（经文化市场行政部门审批或已申报登记并领取相关许可证），有观众席、舞台、灯光设备，公开售票、专供文艺团体演出的文化活动场所。2007年以前艺术表演团体和艺术表演场馆为文化系统内数据，2007年起含非文化部门数据。马 克 数 据 网	7	11	10	6	7	8	12	9	15	18	31	23
210000	辽宁	0	123.429	41.8354	文化	艺术表演场馆机构数	文化-艺术表演团体、艺术表演场馆演出情况-艺术表演场馆机构数	个	艺术表演场馆指由文化部门主办或实行行业管理（经文化市场行政部门审批或已申报登记并领取相关许可证），有观众席、舞台、灯光设备，公开售票、专供文艺团体演出的文化活动场所。2007年以前艺术表演团体和艺术表演场馆为文化系统内数据，2007年起含非文化部门数据。更多数据：www.macrodatas.cn	58	61	111	33	33	105	123	121	121	97	93	85
500000	重庆	1	106.552	29.563	文化	艺术表演场馆机构数	文化-艺术表演团体、艺术表演场馆演出情况-艺术表演场馆机构数	个	艺术表演场馆指由文化部门主办或实行行业管理（经文化市场行政部门审批或已申报登记并领取相关许可证），有观众席、舞台、灯光设备，公开售票、专供文艺团体演出的文化活动场所。2007年以前艺术表演团体和艺术表演场馆为文化系统内数据，2007年起含非文化部门数据。马 克 数 据 网	46	46	31	15	15	22	22	24	43	49	51	62
610000	陕西	0	108.954	34.2655	文化	艺术表演场馆机构数	文化-艺术表演团体、艺术表演场馆演出情况-艺术表演场馆机构数	个	艺术表演场馆指由文化部门主办或实行行业管理（经文化市场行政部门审批或已申报登记并领取相关许可证），有观众席、舞台、灯光设备，公开售票、专供文艺团体演出的文化活动场所。2007年以前艺术表演团体和艺术表演场馆为文化系统内数据，2007年起含非文化部门数据。来源：百度“马 克 数据网”	97	90	98	86	85	88	92	120	102	114	106	102
630000	青海	0	101.78	36.6209	文化	艺术表演场馆机构数	文化-艺术表演团体、艺术表演场馆演出情况-艺术表演场馆机构数	个	艺术表演场馆指由文化部门主办或实行行业管理（经文化市场行政部门审批或已申报登记并领取相关许可证），有观众席、舞台、灯光设备，公开售票、专供文艺团体演出的文化活动场所。2007年以前艺术表演团体和艺术表演场馆为文化系统内数据，2007年起含非文化部门数据。来自：www.macrodatas.cn	20	22	23	16	16	16	20	19	27	39	37	44
230000	黑龙江	0	126.662	45.7423	文化	艺术表演场馆机构数	文化-艺术表演团体、艺术表演场馆演出情况-艺术表演场馆机构数	个	艺术表演场馆指由文化部门主办或实行行业管理（经文化市场行政部门审批或已申报登记并领取相关许可证），有观众席、舞台、灯光设备，公开售票、专供文艺团体演出的文化活动场所。2007年以前艺术表演团体和艺术表演场馆为文化系统内数据，2007年起含非文化部门数据。搜索“马 克 数 据 网”	44	44	43	35	34	38	48	51	56	64	64	62
310000	上海	1	121.474	31.2304	文化	艺术表演场馆演(映)出场次	文化-艺术表演团体、艺术表演场馆演出情况-艺术表演场馆演(映)出场次	千场次	艺术表演场馆指由文化部门主办或实行行业管理（经文化市场行政部门审批或已申报登记并领取相关许可证），有观众席、舞台、灯光设备，公开售票、专供文艺团体演出的文化活动场所。微信公众号“马克 数据网”	22.85	31.8	84.89	15.33	11.6	21.68	22.52	23.2	14.5	18.2	8.2	19.9
530000	云南	1	102.71	25.0458	文化	艺术表演场馆演(映)出场次	文化-艺术表演团体、艺术表演场馆演出情况-艺术表演场馆演(映)出场次	千场次	艺术表演场馆指由文化部门主办或实行行业管理（经文化市场行政部门审批或已申报登记并领取相关许可证），有观众席、舞台、灯光设备，公开售票、专供文艺团体演出的文化活动场所。来源：百度“马 克 数据网”	9.01	8.09	15.44	1.32	1	11.83	10.71	6.1	3.6	7.9	5.9	8.2
150000	内蒙古	0	111.766	40.8175	文化	艺术表演场馆演(映)出场次	文化-艺术表演团体、艺术表演场馆演出情况-艺术表演场馆演(映)出场次	千场次	艺术表演场馆指由文化部门主办或实行行业管理（经文化市场行政部门审批或已申报登记并领取相关许可证），有观众席、舞台、灯光设备，公开售票、专供文艺团体演出的文化活动场所。马 克 数 据 网	9.02	5.24	2.82	3.28	15.35	15.33	23.76	25.8	33.7	18.3	9	7.3
110000	北京	0	116.408	39.904	文化	艺术表演场馆演(映)出场次	文化-艺术表演团体、艺术表演场馆演出情况-艺术表演场馆演(映)出场次	千场次	艺术表演场馆指由文化部门主办或实行行业管理（经文化市场行政部门审批或已申报登记并领取相关许可证），有观众席、舞台、灯光设备，公开售票、专供文艺团体演出的文化活动场所。关注公众号“马克数据网”	54.34	54.9	53.98	12.02	11.32	41.95	67.46	43.7	77.2	206.8	135.4	30.2
220000	吉林	0	125.326	43.8965	文化	艺术表演场馆演(映)出场次	文化-艺术表演团体、艺术表演场馆演出情况-艺术表演场馆演(映)出场次	千场次	艺术表演场馆指由文化部门主办或实行行业管理（经文化市场行政部门审批或已申报登记并领取相关许可证），有观众席、舞台、灯光设备，公开售票、专供文艺团体演出的文化活动场所。搜索“马 克 数 据 网”	13.93	15.83	17.71	18.56	20.38	25.31	30.2	57	21.1	21.1	10.7	21.5
510000	四川	1	104.076	30.6517	文化	艺术表演场馆演(映)出场次	文化-艺术表演团体、艺术表演场馆演出情况-艺术表演场馆演(映)出场次	千场次	艺术表演场馆指由文化部门主办或实行行业管理（经文化市场行政部门审批或已申报登记并领取相关许可证），有观众席、舞台、灯光设备，公开售票、专供文艺团体演出的文化活动场所。微信公众号“马克 数据网”	12.37	13.34	31.63	3.73	1.89	10.72	9.04	12	12.4	13.8	6.3	38.8
120000	天津	0	117.201	39.0842	文化	艺术表演场馆演(映)出场次	文化-艺术表演团体、艺术表演场馆演出情况-艺术表演场馆演(映)出场次	千场次	艺术表演场馆指由文化部门主办或实行行业管理（经文化市场行政部门审批或已申报登记并领取相关许可证），有观众席、舞台、灯光设备，公开售票、专供文艺团体演出的文化活动场所。更多数据：www.macrodatas.cn	20.4	17.09	16.06	13.71	15.99	24.25	25.75	58	64.3	36.3	29.5	24
640000	宁夏	0	106.259	38.4713	文化	艺术表演场馆演(映)出场次	文化-艺术表演团体、艺术表演场馆演出情况-艺术表演场馆演(映)出场次	千场次	艺术表演场馆指由文化部门主办或实行行业管理（经文化市场行政部门审批或已申报登记并领取相关许可证），有观众席、舞台、灯光设备，公开售票、专供文艺团体演出的文化活动场所。来源：马 克 数 据 网	1.61	0.09	0.35	0.5	0.58	0.49	0.9	0.9	1.1	0.3	1.9	0.5
340000	安徽	1	117.285	31.8612	文化	艺术表演场馆演(映)出场次	文化-艺术表演团体、艺术表演场馆演出情况-艺术表演场馆演(映)出场次	千场次	艺术表演场馆指由文化部门主办或实行行业管理（经文化市场行政部门审批或已申报登记并领取相关许可证），有观众席、舞台、灯光设备，公开售票、专供文艺团体演出的文化活动场所。百度搜索“马 克 数 据 网”	15.55	13.21	97.75	17.1	9.95	11.2	25.57	16.1	81.6	17.4	9.3	6.9
370000	山东	0	117.02	36.6685	文化	艺术表演场馆演(映)出场次	文化-艺术表演团体、艺术表演场馆演出情况-艺术表演场馆演(映)出场次	千场次	艺术表演场馆指由文化部门主办或实行行业管理（经文化市场行政部门审批或已申报登记并领取相关许可证），有观众席、舞台、灯光设备，公开售票、专供文艺团体演出的文化活动场所。关注微信公众号“马克数据网”	21.3	26.5	18.33	11.37	9.53	16.87	12.22	13.2	13.9	32.8	18.2	115.8
140000	山西	0	112.562	37.8735	文化	艺术表演场馆演(映)出场次	文化-艺术表演团体、艺术表演场馆演出情况-艺术表演场馆演(映)出场次	千场次	艺术表演场馆指由文化部门主办或实行行业管理（经文化市场行政部门审批或已申报登记并领取相关许可证），有观众席、舞台、灯光设备，公开售票、专供文艺团体演出的文化活动场所。马 克 数 据 网	62.01	63.77	82.01	98.06	72.17	108.77	81.68	75.1	112.5	76.1	33.9	95.5
440000	广东	0	113.267	23.1322	文化	艺术表演场馆演(映)出场次	文化-艺术表演团体、艺术表演场馆演出情况-艺术表演场馆演(映)出场次	千场次	艺术表演场馆指由文化部门主办或实行行业管理（经文化市场行政部门审批或已申报登记并领取相关许可证），有观众席、舞台、灯光设备，公开售票、专供文艺团体演出的文化活动场所。百度搜索“马 克 数 据 网”	33.68	34.36	37.98	12.84	15.23	22.94	27.55	20.8	29.1	11.4	8.9	17.9
450000	广西	0	108.328	22.8155	文化	艺术表演场馆演(映)出场次	文化-艺术表演团体、艺术表演场馆演出情况-艺术表演场馆演(映)出场次	千场次	艺术表演场馆指由文化部门主办或实行行业管理（经文化市场行政部门审批或已申报登记并领取相关许可证），有观众席、舞台、灯光设备，公开售票、专供文艺团体演出的文化活动场所。微信公众号“马克数据网”	18.68	18.44	23.51	18.18	20.55	22.38	23.05	22.9	27.3	25.9	6.7	3.3
650000	新疆	0	87.6277	43.793	文化	艺术表演场馆演(映)出场次	文化-艺术表演团体、艺术表演场馆演出情况-艺术表演场馆演(映)出场次	千场次	艺术表演场馆指由文化部门主办或实行行业管理（经文化市场行政部门审批或已申报登记并领取相关许可证），有观众席、舞台、灯光设备，公开售票、专供文艺团体演出的文化活动场所。来源：马 克 数 据 网	20.44	32.15	42.94	34.78	32.38	40.17	36.52	60.1	60.3	42.4	3.7	7.7
320000	江苏	1	118.763	32.0617	文化	艺术表演场馆演(映)出场次	文化-艺术表演团体、艺术表演场馆演出情况-艺术表演场馆演(映)出场次	千场次	艺术表演场馆指由文化部门主办或实行行业管理（经文化市场行政部门审批或已申报登记并领取相关许可证），有观众席、舞台、灯光设备，公开售票、专供文艺团体演出的文化活动场所。来源：百度“马 克 数据网”	221.72	278.55	363.77	368.23	325.14	378.74	412.41	424.4	270.4	199.3	65.1	135.8
360000	江西	1	115.909	28.6757	文化	艺术表演场馆演(映)出场次	文化-艺术表演团体、艺术表演场馆演出情况-艺术表演场馆演(映)出场次	千场次	艺术表演场馆指由文化部门主办或实行行业管理（经文化市场行政部门审批或已申报登记并领取相关许可证），有观众席、舞台、灯光设备，公开售票、专供文艺团体演出的文化活动场所。来源：马 克 数 据 网	11.1	11.41	15.19	7.62	6.75	6.72	5.91	19.4	26.9	75.8	19.8	108.8
130000	河北	0	114.469	38.0371	文化	艺术表演场馆演(映)出场次	文化-艺术表演团体、艺术表演场馆演出情况-艺术表演场馆演(映)出场次	千场次	艺术表演场馆指由文化部门主办或实行行业管理（经文化市场行政部门审批或已申报登记并领取相关许可证），有观众席、舞台、灯光设备，公开售票、专供文艺团体演出的文化活动场所。微信公众号“马克 数据网”	15.59	17.97	32.29	17.91	18.16	28.64	61.66	61	39.9	75.6	28.1	42.7
410000	河南	0	113.754	34.7655	文化	艺术表演场馆演(映)出场次	文化-艺术表演团体、艺术表演场馆演出情况-艺术表演场馆演(映)出场次	千场次	艺术表演场馆指由文化部门主办或实行行业管理（经文化市场行政部门审批或已申报登记并领取相关许可证），有观众席、舞台、灯光设备，公开售票、专供文艺团体演出的文化活动场所。来自：www.macrodatas.cn	24.16	13.08	19.93	9.59	10.57	19.26	8.69	6.3	15.6	20.7	10.7	17.3
330000	浙江	1	120.153	30.2674	文化	艺术表演场馆演(映)出场次	文化-艺术表演团体、艺术表演场馆演出情况-艺术表演场馆演(映)出场次	千场次	艺术表演场馆指由文化部门主办或实行行业管理（经文化市场行政部门审批或已申报登记并领取相关许可证），有观众席、舞台、灯光设备，公开售票、专供文艺团体演出的文化活动场所。来自：www.macrodatas.cn	68.85	101.29	75.34	40.73	46.09	93.28	98.16	116.9	94.9	122.1	59	98
460000	海南	0	110.349	20.0174	文化	艺术表演场馆演(映)出场次	文化-艺术表演团体、艺术表演场馆演出情况-艺术表演场馆演(映)出场次	千场次	艺术表演场馆指由文化部门主办或实行行业管理（经文化市场行政部门审批或已申报登记并领取相关许可证），有观众席、舞台、灯光设备，公开售票、专供文艺团体演出的文化活动场所。关注公众号“马克数据网”	3.87	6.23	3.67	0.73	0.84	2.46	4.37	3.7	8.3	5.6	17.4	15.7
420000	湖北	1	114.342	30.5465	文化	艺术表演场馆演(映)出场次	文化-艺术表演团体、艺术表演场馆演出情况-艺术表演场馆演(映)出场次	千场次	艺术表演场馆指由文化部门主办或实行行业管理（经文化市场行政部门审批或已申报登记并领取相关许可证），有观众席、舞台、灯光设备，公开售票、专供文艺团体演出的文化活动场所。来源：百度“马 克 数据网”	27.83	40.72	34.41	24.99	27.14	34.86	54.17	53.5	67.4	52.1	17.2	18.4
430000	湖南	1	112.984	28.1124	文化	艺术表演场馆演(映)出场次	文化-艺术表演团体、艺术表演场馆演出情况-艺术表演场馆演(映)出场次	千场次	艺术表演场馆指由文化部门主办或实行行业管理（经文化市场行政部门审批或已申报登记并领取相关许可证），有观众席、舞台、灯光设备，公开售票、专供文艺团体演出的文化活动场所。来源：百度“马 克 数据网”	28.23	38.2	26.55	27.61	25.98	31.29	21.94	33.3	25.5	24.4	16	59.3
620000	甘肃	0	103.826	36.0594	文化	艺术表演场馆演(映)出场次	文化-艺术表演团体、艺术表演场馆演出情况-艺术表演场馆演(映)出场次	千场次	艺术表演场馆指由文化部门主办或实行行业管理（经文化市场行政部门审批或已申报登记并领取相关许可证），有观众席、舞台、灯光设备，公开售票、专供文艺团体演出的文化活动场所。来自马克数据网	2.67	1.71	5.79	4.22	15.96	14.06	25.82	26.3	35.8	14.9	5.5	8.7
350000	福建	0	119.295	26.1008	文化	艺术表演场馆演(映)出场次	文化-艺术表演团体、艺术表演场馆演出情况-艺术表演场馆演(映)出场次	千场次	艺术表演场馆指由文化部门主办或实行行业管理（经文化市场行政部门审批或已申报登记并领取相关许可证），有观众席、舞台、灯光设备，公开售票、专供文艺团体演出的文化活动场所。关注公众号“马 克 数 据 网”	32.68	27.84	40.31	47.38	47.82	45.18	49.54	184.9	54.1	66.9	21.9	37.7
540000	西藏	0	91.1172	29.6469	文化	艺术表演场馆演(映)出场次	文化-艺术表演团体、艺术表演场馆演出情况-艺术表演场馆演(映)出场次	千场次	艺术表演场馆指由文化部门主办或实行行业管理（经文化市场行政部门审批或已申报登记并领取相关许可证），有观众席、舞台、灯光设备，公开售票、专供文艺团体演出的文化活动场所。关注微信公众号“马克数据网”	3.52	4.1	1.43	0.45	0.34	0.35	0.18	0.6	0.1	0.4	0.7	0.7
520000	贵州	1	106.707	26.5982	文化	艺术表演场馆演(映)出场次	文化-艺术表演团体、艺术表演场馆演出情况-艺术表演场馆演(映)出场次	千场次	艺术表演场馆指由文化部门主办或实行行业管理（经文化市场行政部门审批或已申报登记并领取相关许可证），有观众席、舞台、灯光设备，公开售票、专供文艺团体演出的文化活动场所。更多数据：www.macrodatas.cn	0.65	0.66	0.62		0.03	0.06	5.96	0.4	0.6	0.9	0.2	17.3
210000	辽宁	0	123.429	41.8354	文化	艺术表演场馆演(映)出场次	文化-艺术表演团体、艺术表演场馆演出情况-艺术表演场馆演(映)出场次	千场次	艺术表演场馆指由文化部门主办或实行行业管理（经文化市场行政部门审批或已申报登记并领取相关许可证），有观众席、舞台、灯光设备，公开售票、专供文艺团体演出的文化活动场所。搜索“马 克 数 据 网”	10.4	8.92	17.44	4.3	4.69	16.5	31.22	24.9	31	21.7	7.8	25.9
500000	重庆	1	106.552	29.563	文化	艺术表演场馆演(映)出场次	文化-艺术表演团体、艺术表演场馆演出情况-艺术表演场馆演(映)出场次	千场次	艺术表演场馆指由文化部门主办或实行行业管理（经文化市场行政部门审批或已申报登记并领取相关许可证），有观众席、舞台、灯光设备，公开售票、专供文艺团体演出的文化活动场所。马 克 数 据 网	29.38	137.29	3.38	0.55	0.6	1.44	1.16	0.8	6.2	20.3	9.4	6.5
610000	陕西	0	108.954	34.2655	文化	艺术表演场馆演(映)出场次	文化-艺术表演团体、艺术表演场馆演出情况-艺术表演场馆演(映)出场次	千场次	艺术表演场馆指由文化部门主办或实行行业管理（经文化市场行政部门审批或已申报登记并领取相关许可证），有观众席、舞台、灯光设备，公开售票、专供文艺团体演出的文化活动场所。更多数据：搜索“马克数据网”来源：www.macrodatas.cn	5.05	8.65	9.82	8.19	8.14	12.63	8.58	20.2	29.1	43.3	17.1	25.9
630000	青海	0	101.78	36.6209	文化	艺术表演场馆演(映)出场次	文化-艺术表演团体、艺术表演场馆演出情况-艺术表演场馆演(映)出场次	千场次	艺术表演场馆指由文化部门主办或实行行业管理（经文化市场行政部门审批或已申报登记并领取相关许可证），有观众席、舞台、灯光设备，公开售票、专供文艺团体演出的文化活动场所。来源：百度“马 克 数据网”	7.2	5.6	6.81	4.02	1.92	2.03	2.8	2.8	2.4	5.7	2.8	49.7
230000	黑龙江	0	126.662	45.7423	文化	艺术表演场馆演(映)出场次	文化-艺术表演团体、艺术表演场馆演出情况-艺术表演场馆演(映)出场次	千场次	艺术表演场馆指由文化部门主办或实行行业管理（经文化市场行政部门审批或已申报登记并领取相关许可证），有观众席、舞台、灯光设备，公开售票、专供文艺团体演出的文化活动场所。关注公众号“马 克 数 据 网”	2.53	2.62	3.9	1.19	1.17	1.91	3.46	4.4	4.6	5.2	2.4	3.4
310000	上海	1	121.474	31.2304	文化	艺术表演场馆艺术演出场次	文化-艺术表演团体、艺术表演场馆演出情况-艺术表演场馆艺术演出场次	千场次	艺术表演场馆指由文化部门主办或实行行业管理（经文化市场行政部门审批或已申报登记并领取相关许可证），有观众席、舞台、灯光设备，公开售票、专供文艺团体演出的文化活动场所。来源：马 克 数 据 网	10.76	12.5	12.54	3.06	2.61	9.34	7.79	7.5	6.3	6.4	4.8	16.1
530000	云南	1	102.71	25.0458	文化	艺术表演场馆艺术演出场次	文化-艺术表演团体、艺术表演场馆演出情况-艺术表演场馆艺术演出场次	千场次	艺术表演场馆指由文化部门主办或实行行业管理（经文化市场行政部门审批或已申报登记并领取相关许可证），有观众席、舞台、灯光设备，公开售票、专供文艺团体演出的文化活动场所。来源：百度搜索“马克数据网”	1.16	1.4	6.29	0.87	0.8	2.54	3.03	3.4	3.2	5.5	4.7	7.7
150000	内蒙古	0	111.766	40.8175	文化	艺术表演场馆艺术演出场次	文化-艺术表演团体、艺术表演场馆演出情况-艺术表演场馆艺术演出场次	千场次	艺术表演场馆指由文化部门主办或实行行业管理（经文化市场行政部门审批或已申报登记并领取相关许可证），有观众席、舞台、灯光设备，公开售票、专供文艺团体演出的文化活动场所。更多数据：搜索“马克数据网”来源：www.macrodatas.cn	1.64	1.02	0.5	0.38	0.54	2.89	3.76	2.5	2.8	3	3.5	1.3
110000	北京	0	116.408	39.904	文化	艺术表演场馆艺术演出场次	文化-艺术表演团体、艺术表演场馆演出情况-艺术表演场馆艺术演出场次	千场次	艺术表演场馆指由文化部门主办或实行行业管理（经文化市场行政部门审批或已申报登记并领取相关许可证），有观众席、舞台、灯光设备，公开售票、专供文艺团体演出的文化活动场所。来自：www.macrodatas.cn	16.91	16.62	17.1	2.92	2.54	15.41	16.54	15.2	15.8	9.4	112.6	22.7
220000	吉林	0	125.326	43.8965	文化	艺术表演场馆艺术演出场次	文化-艺术表演团体、艺术表演场馆演出情况-艺术表演场馆艺术演出场次	千场次	艺术表演场馆指由文化部门主办或实行行业管理（经文化市场行政部门审批或已申报登记并领取相关许可证），有观众席、舞台、灯光设备，公开售票、专供文艺团体演出的文化活动场所。百度搜索“马 克 数 据 网”	2.15	1.74	3.03	1.16	3.4	5.68	10.86	11.1	3.8	4.5	2.6	5.5
510000	四川	1	104.076	30.6517	文化	艺术表演场馆艺术演出场次	文化-艺术表演团体、艺术表演场馆演出情况-艺术表演场馆艺术演出场次	千场次	艺术表演场馆指由文化部门主办或实行行业管理（经文化市场行政部门审批或已申报登记并领取相关许可证），有观众席、舞台、灯光设备，公开售票、专供文艺团体演出的文化活动场所。微信公众号“马克 数据网”	8.25	8.46	17.69	1.03	1.25	8.97	8.26	8.4	7.5	8.9	4.5	36.1
120000	天津	0	117.201	39.0842	文化	艺术表演场馆艺术演出场次	文化-艺术表演团体、艺术表演场馆演出情况-艺术表演场馆艺术演出场次	千场次	艺术表演场馆指由文化部门主办或实行行业管理（经文化市场行政部门审批或已申报登记并领取相关许可证），有观众席、舞台、灯光设备，公开售票、专供文艺团体演出的文化活动场所。来源：百度“马 克 数据网”	8.32	3.76	2.59	1.51	1.9	4.54	5.59	3.7	5.5	7.9	20.1	14.3
640000	宁夏	0	106.259	38.4713	文化	艺术表演场馆艺术演出场次	文化-艺术表演团体、艺术表演场馆演出情况-艺术表演场馆艺术演出场次	千场次	艺术表演场馆指由文化部门主办或实行行业管理（经文化市场行政部门审批或已申报登记并领取相关许可证），有观众席、舞台、灯光设备，公开售票、专供文艺团体演出的文化活动场所。关注微信公众号“马克数据网”	0.78	0.02	0.04	0.02	0.02	0	0.4	0.2	0.5	0.2	1.9	0.5
340000	安徽	1	117.285	31.8612	文化	艺术表演场馆艺术演出场次	文化-艺术表演团体、艺术表演场馆演出情况-艺术表演场馆艺术演出场次	千场次	艺术表演场馆指由文化部门主办或实行行业管理（经文化市场行政部门审批或已申报登记并领取相关许可证），有观众席、舞台、灯光设备，公开售票、专供文艺团体演出的文化活动场所。更多数据：www.macrodatas.cn	1.93	4.03	5.52	3.04	2.28	5.86	5.71	5.9	4.8	6.1	3	3.7
370000	山东	0	117.02	36.6685	文化	艺术表演场馆艺术演出场次	文化-艺术表演团体、艺术表演场馆演出情况-艺术表演场馆艺术演出场次	千场次	艺术表演场馆指由文化部门主办或实行行业管理（经文化市场行政部门审批或已申报登记并领取相关许可证），有观众席、舞台、灯光设备，公开售票、专供文艺团体演出的文化活动场所。微信公众号“马克数据网”	1.5	3.13	2.19	1.99	2.14	3.81	4	4.4	3.8	22.1	10.7	92.1
140000	山西	0	112.562	37.8735	文化	艺术表演场馆艺术演出场次	文化-艺术表演团体、艺术表演场馆演出情况-艺术表演场馆艺术演出场次	千场次	艺术表演场馆指由文化部门主办或实行行业管理（经文化市场行政部门审批或已申报登记并领取相关许可证），有观众席、舞台、灯光设备，公开售票、专供文艺团体演出的文化活动场所。关注公众号“马克数据网”	4.85	2.07	4.18	8.54	1.87	5.93	7.06	4.2	4.8	5.4	5.7	31.2
440000	广东	0	113.267	23.1322	文化	艺术表演场馆艺术演出场次	文化-艺术表演团体、艺术表演场馆演出情况-艺术表演场馆艺术演出场次	千场次	艺术表演场馆指由文化部门主办或实行行业管理（经文化市场行政部门审批或已申报登记并领取相关许可证），有观众席、舞台、灯光设备，公开售票、专供文艺团体演出的文化活动场所。来源：百度搜索“马克数据网”	8.24	14.59	8.28	2.19	2.16	4.62	6.74	5.4	5.6	3.7	5.7	9.6
450000	广西	0	108.328	22.8155	文化	艺术表演场馆艺术演出场次	文化-艺术表演团体、艺术表演场馆演出情况-艺术表演场馆艺术演出场次	千场次	艺术表演场馆指由文化部门主办或实行行业管理（经文化市场行政部门审批或已申报登记并领取相关许可证），有观众席、舞台、灯光设备，公开售票、专供文艺团体演出的文化活动场所。来源：马 克 数 据 网	1.65	1.02	2.53	1.16	1.4	1.52	2.18	1.3	3.2	6.1	4.1	2.7
650000	新疆	0	87.6277	43.793	文化	艺术表演场馆艺术演出场次	文化-艺术表演团体、艺术表演场馆演出情况-艺术表演场馆艺术演出场次	千场次	艺术表演场馆指由文化部门主办或实行行业管理（经文化市场行政部门审批或已申报登记并领取相关许可证），有观众席、舞台、灯光设备，公开售票、专供文艺团体演出的文化活动场所。关注公众号“马 克 数 据 网”	0.17	0.2	0.76	0.84	0.77	0.49	0.6	1.7	1.2	11.4	0.6	1.4
320000	江苏	1	118.763	32.0617	文化	艺术表演场馆艺术演出场次	文化-艺术表演团体、艺术表演场馆演出情况-艺术表演场馆艺术演出场次	千场次	艺术表演场馆指由文化部门主办或实行行业管理（经文化市场行政部门审批或已申报登记并领取相关许可证），有观众席、舞台、灯光设备，公开售票、专供文艺团体演出的文化活动场所。微信公众号“马克数据网”	7.76	16.88	10.83	14.88	17.04	10.51	25.48	24.8	23.5	11.4	12.2	23.8
360000	江西	1	115.909	28.6757	文化	艺术表演场馆艺术演出场次	文化-艺术表演团体、艺术表演场馆演出情况-艺术表演场馆艺术演出场次	千场次	艺术表演场馆指由文化部门主办或实行行业管理（经文化市场行政部门审批或已申报登记并领取相关许可证），有观众席、舞台、灯光设备，公开售票、专供文艺团体演出的文化活动场所。来源：百度搜索“马克数据网”	5.12	5.8	3.23	2.7	2.84	3.14	2.77	3.5	2.6	11.7	14.1	90.9
130000	河北	0	114.469	38.0371	文化	艺术表演场馆艺术演出场次	文化-艺术表演团体、艺术表演场馆演出情况-艺术表演场馆艺术演出场次	千场次	艺术表演场馆指由文化部门主办或实行行业管理（经文化市场行政部门审批或已申报登记并领取相关许可证），有观众席、舞台、灯光设备，公开售票、专供文艺团体演出的文化活动场所。更多数据：www.macrodatas.cn	4.34	4.11	6.79	1.43	1.27	3.24	9.27	4.4	1.6	3.7	9.1	3.2
410000	河南	0	113.754	34.7655	文化	艺术表演场馆艺术演出场次	文化-艺术表演团体、艺术表演场馆演出情况-艺术表演场馆艺术演出场次	千场次	艺术表演场馆指由文化部门主办或实行行业管理（经文化市场行政部门审批或已申报登记并领取相关许可证），有观众席、舞台、灯光设备，公开售票、专供文艺团体演出的文化活动场所。微信公众号“马克数据网”	3.27	3.08	2.91	1.64	1.66	2.51	3.34	3.8	3.8	6.6	8.4	15.2
330000	浙江	1	120.153	30.2674	文化	艺术表演场馆艺术演出场次	文化-艺术表演团体、艺术表演场馆演出情况-艺术表演场馆艺术演出场次	千场次	艺术表演场馆指由文化部门主办或实行行业管理（经文化市场行政部门审批或已申报登记并领取相关许可证），有观众席、舞台、灯光设备，公开售票、专供文艺团体演出的文化活动场所。微信公众号“马克 数据网”	26.38	17.59	14.79	4.23	5.2	20.92	28.09	42	24.6	23.8	24.5	55.6
460000	海南	0	110.349	20.0174	文化	艺术表演场馆艺术演出场次	文化-艺术表演团体、艺术表演场馆演出情况-艺术表演场馆艺术演出场次	千场次	艺术表演场馆指由文化部门主办或实行行业管理（经文化市场行政部门审批或已申报登记并领取相关许可证），有观众席、舞台、灯光设备，公开售票、专供文艺团体演出的文化活动场所。来源：百度搜索“马克数据网”	0.38	4.73	0.88	0.26	0.4	0.47	0.97	2.3	2.1	3.8	16.9	13.7
420000	湖北	1	114.342	30.5465	文化	艺术表演场馆艺术演出场次	文化-艺术表演团体、艺术表演场馆演出情况-艺术表演场馆艺术演出场次	千场次	艺术表演场馆指由文化部门主办或实行行业管理（经文化市场行政部门审批或已申报登记并领取相关许可证），有观众席、舞台、灯光设备，公开售票、专供文艺团体演出的文化活动场所。微信公众号“马克数据网”	11.29	2.87	26.09	2.08	2.35	3.25	2.39	3.1	2.8	3.4	1.7	15.5
430000	湖南	1	112.984	28.1124	文化	艺术表演场馆艺术演出场次	文化-艺术表演团体、艺术表演场馆演出情况-艺术表演场馆艺术演出场次	千场次	艺术表演场馆指由文化部门主办或实行行业管理（经文化市场行政部门审批或已申报登记并领取相关许可证），有观众席、舞台、灯光设备，公开售票、专供文艺团体演出的文化活动场所。微信公众号“马克数据网”	3.68	3.36	5.02	2.74	1.98	4.32	5.92	9.2	9.9	16.7	10.5	55.5
620000	甘肃	0	103.826	36.0594	文化	艺术表演场馆艺术演出场次	文化-艺术表演团体、艺术表演场馆演出情况-艺术表演场馆艺术演出场次	千场次	艺术表演场馆指由文化部门主办或实行行业管理（经文化市场行政部门审批或已申报登记并领取相关许可证），有观众席、舞台、灯光设备，公开售票、专供文艺团体演出的文化活动场所。来源：百度搜索“马克数据网”	0.71	0.71	0.33	0.24	5.82	1.33	2.46	7.5	6.3	6.7	2.6	5.7
350000	福建	0	119.295	26.1008	文化	艺术表演场馆艺术演出场次	文化-艺术表演团体、艺术表演场馆演出情况-艺术表演场馆艺术演出场次	千场次	艺术表演场馆指由文化部门主办或实行行业管理（经文化市场行政部门审批或已申报登记并领取相关许可证），有观众席、舞台、灯光设备，公开售票、专供文艺团体演出的文化活动场所。更多数据：搜索“马克数据网”来源：www.macrodatas.cn	3.4	1.24	1.04	0.78	1	0.97	1.94	1.7	2.1	14.1	7.9	8.9
540000	西藏	0	91.1172	29.6469	文化	艺术表演场馆艺术演出场次	文化-艺术表演团体、艺术表演场馆演出情况-艺术表演场馆艺术演出场次	千场次	艺术表演场馆指由文化部门主办或实行行业管理（经文化市场行政部门审批或已申报登记并领取相关许可证），有观众席、舞台、灯光设备，公开售票、专供文艺团体演出的文化活动场所。来源：百度搜索“马克数据网”	0.34	0.3	0.43	0.44	0.1	0.08	0.12	0.5	0.1	0.3	0.7	0.7
520000	贵州	1	106.707	26.5982	文化	艺术表演场馆艺术演出场次	文化-艺术表演团体、艺术表演场馆演出情况-艺术表演场馆艺术演出场次	千场次	艺术表演场馆指由文化部门主办或实行行业管理（经文化市场行政部门审批或已申报登记并领取相关许可证），有观众席、舞台、灯光设备，公开售票、专供文艺团体演出的文化活动场所。百度搜索“马 克 数 据 网”	0.28	0.27	0.41		0.03	0.05	0.07	0.3	0.5	0.7	0.2	16.2
210000	辽宁	0	123.429	41.8354	文化	艺术表演场馆艺术演出场次	文化-艺术表演团体、艺术表演场馆演出情况-艺术表演场馆艺术演出场次	千场次	艺术表演场馆指由文化部门主办或实行行业管理（经文化市场行政部门审批或已申报登记并领取相关许可证），有观众席、舞台、灯光设备，公开售票、专供文艺团体演出的文化活动场所。来源：百度搜索“马克数据网”	5.97	2.34	9.01	1.83	1.63	8.05	15.04	16.4	12.7	17.6	4.5	23.6
500000	重庆	1	106.552	29.563	文化	艺术表演场馆艺术演出场次	文化-艺术表演团体、艺术表演场馆演出情况-艺术表演场馆艺术演出场次	千场次	艺术表演场馆指由文化部门主办或实行行业管理（经文化市场行政部门审批或已申报登记并领取相关许可证），有观众席、舞台、灯光设备，公开售票、专供文艺团体演出的文化活动场所。关注微信公众号“马克数据网”	2.01	0.93	0.55	0.53	0.49	1.2	0.96	0.6	3.9	5.3	8.1	5.6
610000	陕西	0	108.954	34.2655	文化	艺术表演场馆艺术演出场次	文化-艺术表演团体、艺术表演场馆演出情况-艺术表演场馆艺术演出场次	千场次	艺术表演场馆指由文化部门主办或实行行业管理（经文化市场行政部门审批或已申报登记并领取相关许可证），有观众席、舞台、灯光设备，公开售票、专供文艺团体演出的文化活动场所。来自：www.macrodatas.cn	2.63	2.33	3.28	2.27	1.88	3.01	5.02	12.2	10.3	11.9	7.2	13.6
630000	青海	0	101.78	36.6209	文化	艺术表演场馆艺术演出场次	文化-艺术表演团体、艺术表演场馆演出情况-艺术表演场馆艺术演出场次	千场次	艺术表演场馆指由文化部门主办或实行行业管理（经文化市场行政部门审批或已申报登记并领取相关许可证），有观众席、舞台、灯光设备，公开售票、专供文艺团体演出的文化活动场所。搜索“马 克 数 据 网”	0.3	0.2	0.16	0.17	0.16	0.43	0.86	0.6	0.6	3.5	1.3	46.2
230000	黑龙江	0	126.662	45.7423	文化	艺术表演场馆艺术演出场次	文化-艺术表演团体、艺术表演场馆演出情况-艺术表演场馆艺术演出场次	千场次	艺术表演场馆指由文化部门主办或实行行业管理（经文化市场行政部门审批或已申报登记并领取相关许可证），有观众席、舞台、灯光设备，公开售票、专供文艺团体演出的文化活动场所。来自马克数据网	0.48	0.7	2.91	0.29	0.67	0.94	2.59	2.7	1.7	2.5	2	3.2
310000	上海	1	121.474	31.2304	文化	艺术表演场馆观众人次	文化-艺术表演团体、艺术表演场馆演出情况-艺术表演场馆观众人次	千人次	艺术表演场馆指由文化部门主办或实行行业管理（经文化市场行政部门审批或已申报登记并领取相关许可证），有观众席、舞台、灯光设备，公开售票、专供文艺团体演出的文化活动场所。来自马克数据网	7845	10081	10835	2151	2378	5277	8194	5868	4900	5630	2363	8022
530000	云南	1	102.71	25.0458	文化	艺术表演场馆观众人次	文化-艺术表演团体、艺术表演场馆演出情况-艺术表演场馆观众人次	千人次	艺术表演场馆指由文化部门主办或实行行业管理（经文化市场行政部门审批或已申报登记并领取相关许可证），有观众席、舞台、灯光设备，公开售票、专供文艺团体演出的文化活动场所。搜索“马 克 数 据 网”	1387	920	4922	651	389	1399	2183	2569	930	1610	3246	4504
150000	内蒙古	0	111.766	40.8175	文化	艺术表演场馆观众人次	文化-艺术表演团体、艺术表演场馆演出情况-艺术表演场馆观众人次	千人次	艺术表演场馆指由文化部门主办或实行行业管理（经文化市场行政部门审批或已申报登记并领取相关许可证），有观众席、舞台、灯光设备，公开售票、专供文艺团体演出的文化活动场所。来源：马 克 数 据 网	1985	924	890	874	826	1072	1438	1538	2420	1710	616	942
110000	北京	0	116.408	39.904	文化	艺术表演场馆观众人次	文化-艺术表演团体、艺术表演场馆演出情况-艺术表演场馆观众人次	千人次	艺术表演场馆指由文化部门主办或实行行业管理（经文化市场行政部门审批或已申报登记并领取相关许可证），有观众席、舞台、灯光设备，公开售票、专供文艺团体演出的文化活动场所。来自马克数据网	10350	9315	10670	2100	2163	8074	11734	10608	10070	11400	3192	3203
220000	吉林	0	125.326	43.8965	文化	艺术表演场馆观众人次	文化-艺术表演团体、艺术表演场馆演出情况-艺术表演场馆观众人次	千人次	艺术表演场馆指由文化部门主办或实行行业管理（经文化市场行政部门审批或已申报登记并领取相关许可证），有观众席、舞台、灯光设备，公开售票、专供文艺团体演出的文化活动场所。微信公众号“马克数据网”	1158	1063	1424	1785	1500	2042	2602	2547	1480	2070	527	745
510000	四川	1	104.076	30.6517	文化	艺术表演场馆观众人次	文化-艺术表演团体、艺术表演场馆演出情况-艺术表演场馆观众人次	千人次	艺术表演场馆指由文化部门主办或实行行业管理（经文化市场行政部门审批或已申报登记并领取相关许可证），有观众席、舞台、灯光设备，公开售票、专供文艺团体演出的文化活动场所。关注公众号“马克数据网”	3787	2177	10631	826	935	2015	2284	2580	3030	3210	1137	3727
120000	天津	0	117.201	39.0842	文化	艺术表演场馆观众人次	文化-艺术表演团体、艺术表演场馆演出情况-艺术表演场馆观众人次	千人次	艺术表演场馆指由文化部门主办或实行行业管理（经文化市场行政部门审批或已申报登记并领取相关许可证），有观众席、舞台、灯光设备，公开售票、专供文艺团体演出的文化活动场所。微信公众号“马克 数据网”	2344	1453	1483	1390	1532	2898	2648	4460	4000	3700	1413	3005
640000	宁夏	0	106.259	38.4713	文化	艺术表演场馆观众人次	文化-艺术表演团体、艺术表演场馆演出情况-艺术表演场馆观众人次	千人次	艺术表演场馆指由文化部门主办或实行行业管理（经文化市场行政部门审批或已申报登记并领取相关许可证），有观众席、舞台、灯光设备，公开售票、专供文艺团体演出的文化活动场所。来源：百度搜索“马克数据网”	340	12	145	109	72	11	118	237	1060	140	110	88
340000	安徽	1	117.285	31.8612	文化	艺术表演场馆观众人次	文化-艺术表演团体、艺术表演场馆演出情况-艺术表演场馆观众人次	千人次	艺术表演场馆指由文化部门主办或实行行业管理（经文化市场行政部门审批或已申报登记并领取相关许可证），有观众席、舞台、灯光设备，公开售票、专供文艺团体演出的文化活动场所。更多数据：搜索“马克数据网”来源：www.macrodatas.cn	2516	2091	42945	2595	3171	3356	5504	4895	6790	4020	1359	1694
370000	山东	0	117.02	36.6685	文化	艺术表演场馆观众人次	文化-艺术表演团体、艺术表演场馆演出情况-艺术表演场馆观众人次	千人次	艺术表演场馆指由文化部门主办或实行行业管理（经文化市场行政部门审批或已申报登记并领取相关许可证），有观众席、舞台、灯光设备，公开售票、专供文艺团体演出的文化活动场所。百度搜索“马 克 数 据 网”	5291	3070	3811	2990	3135	3960	3930	4168	5850	5380	5622	5416
140000	山西	0	112.562	37.8735	文化	艺术表演场馆观众人次	文化-艺术表演团体、艺术表演场馆演出情况-艺术表演场馆观众人次	千人次	艺术表演场馆指由文化部门主办或实行行业管理（经文化市场行政部门审批或已申报登记并领取相关许可证），有观众席、舞台、灯光设备，公开售票、专供文艺团体演出的文化活动场所。来自：www.macrodatas.cn	8392	2814	5701	5166	3271	4408	3818	5493	4430	3660	2217	3357
440000	广东	0	113.267	23.1322	文化	艺术表演场馆观众人次	文化-艺术表演团体、艺术表演场馆演出情况-艺术表演场馆观众人次	千人次	艺术表演场馆指由文化部门主办或实行行业管理（经文化市场行政部门审批或已申报登记并领取相关许可证），有观众席、舞台、灯光设备，公开售票、专供文艺团体演出的文化活动场所。来源：百度搜索“马克数据网”	8939	11944	11823	3154	2721	4626	5632	12464	17170	7610	2278	6609
450000	广西	0	108.328	22.8155	文化	艺术表演场馆观众人次	文化-艺术表演团体、艺术表演场馆演出情况-艺术表演场馆观众人次	千人次	艺术表演场馆指由文化部门主办或实行行业管理（经文化市场行政部门审批或已申报登记并领取相关许可证），有观众席、舞台、灯光设备，公开售票、专供文艺团体演出的文化活动场所。来源：马 克 数 据 网	1360	1306	1592	1228	1145	2169	1232	976	1900	1780	1847	2500
650000	新疆	0	87.6277	43.793	文化	艺术表演场馆观众人次	文化-艺术表演团体、艺术表演场馆演出情况-艺术表演场馆观众人次	千人次	艺术表演场馆指由文化部门主办或实行行业管理（经文化市场行政部门审批或已申报登记并领取相关许可证），有观众席、舞台、灯光设备，公开售票、专供文艺团体演出的文化活动场所。来源：百度搜索“马克数据网”	1070	1036	1456	983	669	3455	714	1065	1200	900	508	584
320000	江苏	1	118.763	32.0617	文化	艺术表演场馆观众人次	文化-艺术表演团体、艺术表演场馆演出情况-艺术表演场馆观众人次	千人次	艺术表演场馆指由文化部门主办或实行行业管理（经文化市场行政部门审批或已申报登记并领取相关许可证），有观众席、舞台、灯光设备，公开售票、专供文艺团体演出的文化活动场所。微信公众号“马克数据网”	19214	16080	19991	21601	16965	20244	19742	17359	10690	8920	4367	9949
360000	江西	1	115.909	28.6757	文化	艺术表演场馆观众人次	文化-艺术表演团体、艺术表演场馆演出情况-艺术表演场馆观众人次	千人次	艺术表演场馆指由文化部门主办或实行行业管理（经文化市场行政部门审批或已申报登记并领取相关许可证），有观众席、舞台、灯光设备，公开售票、专供文艺团体演出的文化活动场所。关注微信公众号“马克数据网”	1772	1330	10951	2039	1976	1738	1254	2328	3150	3860	1483	5746
130000	河北	0	114.469	38.0371	文化	艺术表演场馆观众人次	文化-艺术表演团体、艺术表演场馆演出情况-艺术表演场馆观众人次	千人次	艺术表演场馆指由文化部门主办或实行行业管理（经文化市场行政部门审批或已申报登记并领取相关许可证），有观众席、舞台、灯光设备，公开售票、专供文艺团体演出的文化活动场所。更多数据：搜索“马克数据网”来源：www.macrodatas.cn	3740	3043	4739	2042	1444	2569	2238	1995	1590	2690	898	1903
410000	河南	0	113.754	34.7655	文化	艺术表演场馆观众人次	文化-艺术表演团体、艺术表演场馆演出情况-艺术表演场馆观众人次	千人次	艺术表演场馆指由文化部门主办或实行行业管理（经文化市场行政部门审批或已申报登记并领取相关许可证），有观众席、舞台、灯光设备，公开售票、专供文艺团体演出的文化活动场所。更多数据：搜索“马克数据网”来源：www.macrodatas.cn	3613	3223	6110	2290	2206	2728	3044	3198	3090	7210	2892	4665
330000	浙江	1	120.153	30.2674	文化	艺术表演场馆观众人次	文化-艺术表演团体、艺术表演场馆演出情况-艺术表演场馆观众人次	千人次	艺术表演场馆指由文化部门主办或实行行业管理（经文化市场行政部门审批或已申报登记并领取相关许可证），有观众席、舞台、灯光设备，公开售票、专供文艺团体演出的文化活动场所。更多数据：搜索“马克数据网”来源：www.macrodatas.cn	17434	13087	13510	8944	7443	13008	22371	15253	13260	13200	5861	14499
460000	海南	0	110.349	20.0174	文化	艺术表演场馆观众人次	文化-艺术表演团体、艺术表演场馆演出情况-艺术表演场馆观众人次	千人次	艺术表演场馆指由文化部门主办或实行行业管理（经文化市场行政部门审批或已申报登记并领取相关许可证），有观众席、舞台、灯光设备，公开售票、专供文艺团体演出的文化活动场所。来源：百度“马 克 数据网”	1104	637	693	511	235	1518	3847	6244	6600	6010	2318	3525
420000	湖北	1	114.342	30.5465	文化	艺术表演场馆观众人次	文化-艺术表演团体、艺术表演场馆演出情况-艺术表演场馆观众人次	千人次	艺术表演场馆指由文化部门主办或实行行业管理（经文化市场行政部门审批或已申报登记并领取相关许可证），有观众席、舞台、灯光设备，公开售票、专供文艺团体演出的文化活动场所。关注微信公众号“马克数据网”	7722	3029	3351	2562	2618	2879	3289	3219	3080	2980	1082	2494
430000	湖南	1	112.984	28.1124	文化	艺术表演场馆观众人次	文化-艺术表演团体、艺术表演场馆演出情况-艺术表演场馆观众人次	千人次	艺术表演场馆指由文化部门主办或实行行业管理（经文化市场行政部门审批或已申报登记并领取相关许可证），有观众席、舞台、灯光设备，公开售票、专供文艺团体演出的文化活动场所。马 克 数 据 网	3189	4507	4416	3293	3192	6894	5722	6549	7620	7860	6129	11777
620000	甘肃	0	103.826	36.0594	文化	艺术表演场馆观众人次	文化-艺术表演团体、艺术表演场馆演出情况-艺术表演场馆观众人次	千人次	艺术表演场馆指由文化部门主办或实行行业管理（经文化市场行政部门审批或已申报登记并领取相关许可证），有观众席、舞台、灯光设备，公开售票、专供文艺团体演出的文化活动场所。来自：www.macrodatas.cn	571	815	864	463	704	711	1039	2004	1770	1650	942	1034
350000	福建	0	119.295	26.1008	文化	艺术表演场馆观众人次	文化-艺术表演团体、艺术表演场馆演出情况-艺术表演场馆观众人次	千人次	艺术表演场馆指由文化部门主办或实行行业管理（经文化市场行政部门审批或已申报登记并领取相关许可证），有观众席、舞台、灯光设备，公开售票、专供文艺团体演出的文化活动场所。马 克 数 据 网	2636	1620	2316	2226	2505	2284	3147	2680	2180	3690	1673	2968
540000	西藏	0	91.1172	29.6469	文化	艺术表演场馆观众人次	文化-艺术表演团体、艺术表演场馆演出情况-艺术表演场馆观众人次	千人次	艺术表演场馆指由文化部门主办或实行行业管理（经文化市场行政部门审批或已申报登记并领取相关许可证），有观众席、舞台、灯光设备，公开售票、专供文艺团体演出的文化活动场所。来源：百度搜索“马克数据网”	687	350	316	104	90	98	72	74	40	600	109	45
520000	贵州	1	106.707	26.5982	文化	艺术表演场馆观众人次	文化-艺术表演团体、艺术表演场馆演出情况-艺术表演场馆观众人次	千人次	艺术表演场馆指由文化部门主办或实行行业管理（经文化市场行政部门审批或已申报登记并领取相关许可证），有观众席、舞台、灯光设备，公开售票、专供文艺团体演出的文化活动场所。关注公众号“马克数据网”	339	412	295		28	80	55	34	100	460	37	694
210000	辽宁	0	123.429	41.8354	文化	艺术表演场馆观众人次	文化-艺术表演团体、艺术表演场馆演出情况-艺术表演场馆观众人次	千人次	艺术表演场馆指由文化部门主办或实行行业管理（经文化市场行政部门审批或已申报登记并领取相关许可证），有观众席、舞台、灯光设备，公开售票、专供文艺团体演出的文化活动场所。关注公众号“马克数据网”	3310	2826	5029	1516	1345	3820	5377	7424	14020	5340	1866	3827
500000	重庆	1	106.552	29.563	文化	艺术表演场馆观众人次	文化-艺术表演团体、艺术表演场馆演出情况-艺术表演场馆观众人次	千人次	艺术表演场馆指由文化部门主办或实行行业管理（经文化市场行政部门审批或已申报登记并领取相关许可证），有观众席、舞台、灯光设备，公开售票、专供文艺团体演出的文化活动场所。来自：www.macrodatas.cn	5831	5433	816	194	229	586	733	425	1280	1180	779	1305
610000	陕西	0	108.954	34.2655	文化	艺术表演场馆观众人次	文化-艺术表演团体、艺术表演场馆演出情况-艺术表演场馆观众人次	千人次	艺术表演场馆指由文化部门主办或实行行业管理（经文化市场行政部门审批或已申报登记并领取相关许可证），有观众席、舞台、灯光设备，公开售票、专供文艺团体演出的文化活动场所。百度搜索“马 克 数 据 网”	2180	2661	2730	2480	1880	2313	2517	3479	3730	4120	2548	1386
630000	青海	0	101.78	36.6209	文化	艺术表演场馆观众人次	文化-艺术表演团体、艺术表演场馆演出情况-艺术表演场馆观众人次	千人次	艺术表演场馆指由文化部门主办或实行行业管理（经文化市场行政部门审批或已申报登记并领取相关许可证），有观众席、舞台、灯光设备，公开售票、专供文艺团体演出的文化活动场所。百度搜索“马 克 数 据 网”	594	383	425	518	555	586	686	447	1060	810	663	987
230000	黑龙江	0	126.662	45.7423	文化	艺术表演场馆观众人次	文化-艺术表演团体、艺术表演场馆演出情况-艺术表演场馆观众人次	千人次	艺术表演场馆指由文化部门主办或实行行业管理（经文化市场行政部门审批或已申报登记并领取相关许可证），有观众席、舞台、灯光设备，公开售票、专供文艺团体演出的文化活动场所。更多数据：搜索“马克数据网”来源：www.macrodatas.cn	1729	1029	773	546	559	536	1084	1585	1550	1360	365	502
310000	上海	1	121.474	31.2304	文化	艺术表演场馆艺术演出观众人次	文化-艺术表演团体、艺术表演场馆演出情况-艺术表演场馆艺术演出观众人次	千人次	艺术表演场馆指由文化部门主办或实行行业管理（经文化市场行政部门审批或已申报登记并领取相关许可证），有观众席、舞台、灯光设备，公开售票、专供文艺团体演出的文化活动场所。来源：马 克 数 据 网	6157	8314	7060	1690	1491	2620	2554	2917	3970	3880	1900	7209
530000	云南	1	102.71	25.0458	文化	艺术表演场馆艺术演出观众人次	文化-艺术表演团体、艺术表演场馆演出情况-艺术表演场馆艺术演出观众人次	千人次	艺术表演场馆指由文化部门主办或实行行业管理（经文化市场行政部门审批或已申报登记并领取相关许可证），有观众席、舞台、灯光设备，公开售票、专供文艺团体演出的文化活动场所。更多数据：www.macrodatas.cn	493	752	3177	401	251	266	202	297	750	1150	3237	4360
150000	内蒙古	0	111.766	40.8175	文化	艺术表演场馆艺术演出观众人次	文化-艺术表演团体、艺术表演场馆演出情况-艺术表演场馆艺术演出观众人次	千人次	艺术表演场馆指由文化部门主办或实行行业管理（经文化市场行政部门审批或已申报登记并领取相关许可证），有观众席、舞台、灯光设备，公开售票、专供文艺团体演出的文化活动场所。微信公众号“马克 数据网”	611	591	235	296	298	582	639	295	620	710	216	509
110000	北京	0	116.408	39.904	文化	艺术表演场馆艺术演出观众人次	文化-艺术表演团体、艺术表演场馆演出情况-艺术表演场馆艺术演出观众人次	千人次	艺术表演场馆指由文化部门主办或实行行业管理（经文化市场行政部门审批或已申报登记并领取相关许可证），有观众席、舞台、灯光设备，公开售票、专供文艺团体演出的文化活动场所。来自：www.macrodatas.cn	8142	7821	8403	1682	1710	1769	1889	1572	6010	3170	2517	2287
220000	吉林	0	125.326	43.8965	文化	艺术表演场馆艺术演出观众人次	文化-艺术表演团体、艺术表演场馆演出情况-艺术表演场馆艺术演出观众人次	千人次	艺术表演场馆指由文化部门主办或实行行业管理（经文化市场行政部门审批或已申报登记并领取相关许可证），有观众席、舞台、灯光设备，公开售票、专供文艺团体演出的文化活动场所。来源：百度“马 克 数据网”	635	593	783	436	441	456	863	853	400	800	256	363
510000	四川	1	104.076	30.6517	文化	艺术表演场馆艺术演出观众人次	文化-艺术表演团体、艺术表演场馆演出情况-艺术表演场馆艺术演出观众人次	千人次	艺术表演场馆指由文化部门主办或实行行业管理（经文化市场行政部门审批或已申报登记并领取相关许可证），有观众席、舞台、灯光设备，公开售票、专供文艺团体演出的文化活动场所。关注微信公众号“马克数据网”	2460	1662	2717	512	594	497	627	815	1500	2140	869	3128
120000	天津	0	117.201	39.0842	文化	艺术表演场馆艺术演出观众人次	文化-艺术表演团体、艺术表演场馆演出情况-艺术表演场馆艺术演出观众人次	千人次	艺术表演场馆指由文化部门主办或实行行业管理（经文化市场行政部门审批或已申报登记并领取相关许可证），有观众席、舞台、灯光设备，公开售票、专供文艺团体演出的文化活动场所。更多数据：www.macrodatas.cn	1677	867	888	629	821	917	1101	1058	2200	1190	801	1747
640000	宁夏	0	106.259	38.4713	文化	艺术表演场馆艺术演出观众人次	文化-艺术表演团体、艺术表演场馆演出情况-艺术表演场馆艺术演出观众人次	千人次	艺术表演场馆指由文化部门主办或实行行业管理（经文化市场行政部门审批或已申报登记并领取相关许可证），有观众席、舞台、灯光设备，公开售票、专供文艺团体演出的文化活动场所。来源：马 克 数 据 网	134	6	38	11	11	0		185	1020	100	90	77
340000	安徽	1	117.285	31.8612	文化	艺术表演场馆艺术演出观众人次	文化-艺术表演团体、艺术表演场馆演出情况-艺术表演场馆艺术演出观众人次	千人次	艺术表演场馆指由文化部门主办或实行行业管理（经文化市场行政部门审批或已申报登记并领取相关许可证），有观众席、舞台、灯光设备，公开售票、专供文艺团体演出的文化活动场所。更多数据：www.macrodatas.cn	710	761	2322	1053	1018	799	874	1055	1550	2050	792	1138
370000	山东	0	117.02	36.6685	文化	艺术表演场馆艺术演出观众人次	文化-艺术表演团体、艺术表演场馆演出情况-艺术表演场馆艺术演出观众人次	千人次	艺术表演场馆指由文化部门主办或实行行业管理（经文化市场行政部门审批或已申报登记并领取相关许可证），有观众席、舞台、灯光设备，公开售票、专供文艺团体演出的文化活动场所。来源：百度搜索“马克数据网”	1103	1220	1833	1620	1586	1586	1832	2193	1930	3060	1880	4044
140000	山西	0	112.562	37.8735	文化	艺术表演场馆艺术演出观众人次	文化-艺术表演团体、艺术表演场馆演出情况-艺术表演场馆艺术演出观众人次	千人次	艺术表演场馆指由文化部门主办或实行行业管理（经文化市场行政部门审批或已申报登记并领取相关许可证），有观众席、舞台、灯光设备，公开售票、专供文艺团体演出的文化活动场所。关注公众号“马克数据网”	3196	536	1858	1604	948	1420	1438	1998	1930	1680	822	1736
440000	广东	0	113.267	23.1322	文化	艺术表演场馆艺术演出观众人次	文化-艺术表演团体、艺术表演场馆演出情况-艺术表演场馆艺术演出观众人次	千人次	艺术表演场馆指由文化部门主办或实行行业管理（经文化市场行政部门审批或已申报登记并领取相关许可证），有观众席、舞台、灯光设备，公开售票、专供文艺团体演出的文化活动场所。来源：百度“马 克 数据网”	5098	5305	4060	1502	1438	1515	2483	2103	4550	3140	1765	4706
450000	广西	0	108.328	22.8155	文化	艺术表演场馆艺术演出观众人次	文化-艺术表演团体、艺术表演场馆演出情况-艺术表演场馆艺术演出观众人次	千人次	艺术表演场馆指由文化部门主办或实行行业管理（经文化市场行政部门审批或已申报登记并领取相关许可证），有观众席、舞台、灯光设备，公开售票、专供文艺团体演出的文化活动场所。来源：百度搜索“马克数据网”	703	509	662	582	623	314	94	138	150	630	1734	2401
650000	新疆	0	87.6277	43.793	文化	艺术表演场馆艺术演出观众人次	文化-艺术表演团体、艺术表演场馆演出情况-艺术表演场馆艺术演出观众人次	千人次	艺术表演场馆指由文化部门主办或实行行业管理（经文化市场行政部门审批或已申报登记并领取相关许可证），有观众席、舞台、灯光设备，公开售票、专供文艺团体演出的文化活动场所。更多数据：搜索“马克数据网”来源：www.macrodatas.cn	90	113	327	266	152	201	185	82	660	530	443	69
320000	江苏	1	118.763	32.0617	文化	艺术表演场馆艺术演出观众人次	文化-艺术表演团体、艺术表演场馆演出情况-艺术表演场馆艺术演出观众人次	千人次	艺术表演场馆指由文化部门主办或实行行业管理（经文化市场行政部门审批或已申报登记并领取相关许可证），有观众席、舞台、灯光设备，公开售票、专供文艺团体演出的文化活动场所。搜索“马 克 数 据 网”	3185	2421	4255	2725	2890	3035	3638	3949	4010	3140	3018	5658
360000	江西	1	115.909	28.6757	文化	艺术表演场馆艺术演出观众人次	文化-艺术表演团体、艺术表演场馆演出情况-艺术表演场馆艺术演出观众人次	千人次	艺术表演场馆指由文化部门主办或实行行业管理（经文化市场行政部门审批或已申报登记并领取相关许可证），有观众席、舞台、灯光设备，公开售票、专供文艺团体演出的文化活动场所。更多数据：www.macrodatas.cn	1153	642	1347	954	1233	1129	624	696	1030	1570	963	4479
130000	河北	0	114.469	38.0371	文化	艺术表演场馆艺术演出观众人次	文化-艺术表演团体、艺术表演场馆演出情况-艺术表演场馆艺术演出观众人次	千人次	艺术表演场馆指由文化部门主办或实行行业管理（经文化市场行政部门审批或已申报登记并领取相关许可证），有观众席、舞台、灯光设备，公开售票、专供文艺团体演出的文化活动场所。马 克 数 据 网	2080	967	2265	604	470	533	533	657	640	1210	386	961
410000	河南	0	113.754	34.7655	文化	艺术表演场馆艺术演出观众人次	文化-艺术表演团体、艺术表演场馆演出情况-艺术表演场馆艺术演出观众人次	千人次	艺术表演场馆指由文化部门主办或实行行业管理（经文化市场行政部门审批或已申报登记并领取相关许可证），有观众席、舞台、灯光设备，公开售票、专供文艺团体演出的文化活动场所。更多数据：www.macrodatas.cn	1423	1589	1343	1065	978	1144	1115	989	1630	3480	1533	3577
330000	浙江	1	120.153	30.2674	文化	艺术表演场馆艺术演出观众人次	文化-艺术表演团体、艺术表演场馆演出情况-艺术表演场馆艺术演出观众人次	千人次	艺术表演场馆指由文化部门主办或实行行业管理（经文化市场行政部门审批或已申报登记并领取相关许可证），有观众席、舞台、灯光设备，公开售票、专供文艺团体演出的文化活动场所。马 克 数 据 网	5814	5146	6097	2610	2857	3284	2902	2698	7320	7640	4056	12327
460000	海南	0	110.349	20.0174	文化	艺术表演场馆艺术演出观众人次	文化-艺术表演团体、艺术表演场馆演出情况-艺术表演场馆艺术演出观众人次	千人次	艺术表演场馆指由文化部门主办或实行行业管理（经文化市场行政部门审批或已申报登记并领取相关许可证），有观众席、舞台、灯光设备，公开售票、专供文艺团体演出的文化活动场所。来源：马 克 数 据 网	247	414	289	263	131	261	184	128	1490	5640	2303	3199
420000	湖北	1	114.342	30.5465	文化	艺术表演场馆艺术演出观众人次	文化-艺术表演团体、艺术表演场馆演出情况-艺术表演场馆艺术演出观众人次	千人次	艺术表演场馆指由文化部门主办或实行行业管理（经文化市场行政部门审批或已申报登记并领取相关许可证），有观众席、舞台、灯光设备，公开售票、专供文艺团体演出的文化活动场所。关注公众号“马克数据网”	1809	1266	1794	1403	1460	1544	1422	1829	1550	1850	715	1653
430000	湖南	1	112.984	28.1124	文化	艺术表演场馆艺术演出观众人次	文化-艺术表演团体、艺术表演场馆演出情况-艺术表演场馆艺术演出观众人次	千人次	艺术表演场馆指由文化部门主办或实行行业管理（经文化市场行政部门审批或已申报登记并领取相关许可证），有观众席、舞台、灯光设备，公开售票、专供文艺团体演出的文化活动场所。来源：百度搜索“马克数据网”	1536	1089	1847	1288	1290	1526	1309	1578	3870	5980	3732	8851
620000	甘肃	0	103.826	36.0594	文化	艺术表演场馆艺术演出观众人次	文化-艺术表演团体、艺术表演场馆演出情况-艺术表演场馆艺术演出观众人次	千人次	艺术表演场馆指由文化部门主办或实行行业管理（经文化市场行政部门审批或已申报登记并领取相关许可证），有观众席、舞台、灯光设备，公开售票、专供文艺团体演出的文化活动场所。来自：www.macrodatas.cn	421	345	352	135	374	369	374	388	1370	1050	691	832
350000	福建	0	119.295	26.1008	文化	艺术表演场馆艺术演出观众人次	文化-艺术表演团体、艺术表演场馆演出情况-艺术表演场馆艺术演出观众人次	千人次	艺术表演场馆指由文化部门主办或实行行业管理（经文化市场行政部门审批或已申报登记并领取相关许可证），有观众席、舞台、灯光设备，公开售票、专供文艺团体演出的文化活动场所。微信公众号“马克数据网”	1001	557	914	415	350	324	497	445	680	2170	1416	1749
540000	西藏	0	91.1172	29.6469	文化	艺术表演场馆艺术演出观众人次	文化-艺术表演团体、艺术表演场馆演出情况-艺术表演场馆艺术演出观众人次	千人次	艺术表演场馆指由文化部门主办或实行行业管理（经文化市场行政部门审批或已申报登记并领取相关许可证），有观众席、舞台、灯光设备，公开售票、专供文艺团体演出的文化活动场所。关注公众号“马 克 数 据 网”	116	69	120	98	52	33	51	49	20	580	108	38
520000	贵州	1	106.707	26.5982	文化	艺术表演场馆艺术演出观众人次	文化-艺术表演团体、艺术表演场馆演出情况-艺术表演场馆艺术演出观众人次	千人次	艺术表演场馆指由文化部门主办或实行行业管理（经文化市场行政部门审批或已申报登记并领取相关许可证），有观众席、舞台、灯光设备，公开售票、专供文艺团体演出的文化活动场所。更多数据：搜索“马克数据网”来源：www.macrodatas.cn	129	47	274		20	0		0	100	450	24	342
210000	辽宁	0	123.429	41.8354	文化	艺术表演场馆艺术演出观众人次	文化-艺术表演团体、艺术表演场馆演出情况-艺术表演场馆艺术演出观众人次	千人次	艺术表演场馆指由文化部门主办或实行行业管理（经文化市场行政部门审批或已申报登记并领取相关许可证），有观众席、舞台、灯光设备，公开售票、专供文艺团体演出的文化活动场所。关注公众号“马克数据网”	1893	1055	3192	944	515	536	922	707	2210	4410	1317	3151
500000	重庆	1	106.552	29.563	文化	艺术表演场馆艺术演出观众人次	文化-艺术表演团体、艺术表演场馆演出情况-艺术表演场馆艺术演出观众人次	千人次	艺术表演场馆指由文化部门主办或实行行业管理（经文化市场行政部门审批或已申报登记并领取相关许可证），有观众席、舞台、灯光设备，公开售票、专供文艺团体演出的文化活动场所。马 克 数 据 网	752	883	392	183	158	97	166	97	970	490	645	1059
610000	陕西	0	108.954	34.2655	文化	艺术表演场馆艺术演出观众人次	文化-艺术表演团体、艺术表演场馆演出情况-艺术表演场馆艺术演出观众人次	千人次	艺术表演场馆指由文化部门主办或实行行业管理（经文化市场行政部门审批或已申报登记并领取相关许可证），有观众席、舞台、灯光设备，公开售票、专供文艺团体演出的文化活动场所。来自马克数据网	1242	1044	1589	1023	910	1183	1478	1482	2110	2360	2056	754
630000	青海	0	101.78	36.6209	文化	艺术表演场馆艺术演出观众人次	文化-艺术表演团体、艺术表演场馆演出情况-艺术表演场馆艺术演出观众人次	千人次	艺术表演场馆指由文化部门主办或实行行业管理（经文化市场行政部门审批或已申报登记并领取相关许可证），有观众席、舞台、灯光设备，公开售票、专供文艺团体演出的文化活动场所。关注微信公众号“马克数据网”	74	24	37	43	50	70	104	57	250	120	49	329
230000	黑龙江	0	126.662	45.7423	文化	艺术表演场馆艺术演出观众人次	文化-艺术表演团体、艺术表演场馆演出情况-艺术表演场馆艺术演出观众人次	千人次	艺术表演场馆指由文化部门主办或实行行业管理（经文化市场行政部门审批或已申报登记并领取相关许可证），有观众席、舞台、灯光设备，公开售票、专供文艺团体演出的文化活动场所。来源：马 克 数 据 网	335	546	346	156	323	258	467	360	1310	690	238	435
310000	上海	1	121.474	31.2304	文化	文化教育广电邮政系统数	文化-出版物发行机构数和网点数-文化教育广电邮政系统数	处		2390	2390	2285	2114	2214	1723	1367	1103	536
530000	云南	1	102.71	25.0458	文化	文化教育广电邮政系统数	文化-出版物发行机构数和网点数-文化教育广电邮政系统数	处		1736	1736	1812	1814	1810	1828	1831	1831	1831
150000	内蒙古	0	111.766	40.8175	文化	文化教育广电邮政系统数	文化-出版物发行机构数和网点数-文化教育广电邮政系统数	处
110000	北京	0	116.408	39.904	文化	文化教育广电邮政系统数	文化-出版物发行机构数和网点数-文化教育广电邮政系统数	处		2483	2400	2053	2347	2347	2347	2347	2347	2347
220000	吉林	0	125.326	43.8965	文化	文化教育广电邮政系统数	文化-出版物发行机构数和网点数-文化教育广电邮政系统数	处		231	243	243	985	985	960	275	275	275
510000	四川	1	104.076	30.6517	文化	文化教育广电邮政系统数	文化-出版物发行机构数和网点数-文化教育广电邮政系统数	处		3270	3389	3270	3200	3160	3148	3200	3100	3100
120000	天津	0	117.201	39.0842	文化	文化教育广电邮政系统数	文化-出版物发行机构数和网点数-文化教育广电邮政系统数	处									521	521
640000	宁夏	0	106.259	38.4713	文化	文化教育广电邮政系统数	文化-出版物发行机构数和网点数-文化教育广电邮政系统数	处		436	457	457	439	392	390	200	200	298
340000	安徽	1	117.285	31.8612	文化	文化教育广电邮政系统数	文化-出版物发行机构数和网点数-文化教育广电邮政系统数	处		3576	3580	3560	3582	3657	3457	3457	3457	1937
370000	山东	0	117.02	36.6685	文化	文化教育广电邮政系统数	文化-出版物发行机构数和网点数-文化教育广电邮政系统数	处		916	920	905	890	690	690	690	690	500
140000	山西	0	112.562	37.8735	文化	文化教育广电邮政系统数	文化-出版物发行机构数和网点数-文化教育广电邮政系统数	处		535	445	445	363	309	329	302	340	335
440000	广东	0	113.267	23.1322	文化	文化教育广电邮政系统数	文化-出版物发行机构数和网点数-文化教育广电邮政系统数	处		3293
450000	广西	0	108.328	22.8155	文化	文化教育广电邮政系统数	文化-出版物发行机构数和网点数-文化教育广电邮政系统数	处		1520	1924	1924	1920	1728	1670	1670	1670	1180
650000	新疆	0	87.6277	43.793	文化	文化教育广电邮政系统数	文化-出版物发行机构数和网点数-文化教育广电邮政系统数	处				170	170	110	110	110	1544	1544
320000	江苏	1	118.763	32.0617	文化	文化教育广电邮政系统数	文化-出版物发行机构数和网点数-文化教育广电邮政系统数	处		1645	1683	2470	2414	2220	2180	2070	2376	1538
360000	江西	1	115.909	28.6757	文化	文化教育广电邮政系统数	文化-出版物发行机构数和网点数-文化教育广电邮政系统数	处		21	21	21	21	21	21	21	21	2658
130000	河北	0	114.469	38.0371	文化	文化教育广电邮政系统数	文化-出版物发行机构数和网点数-文化教育广电邮政系统数	处		1436	874	2107	2107	2107	1455	1965	2460	2434
410000	河南	0	113.754	34.7655	文化	文化教育广电邮政系统数	文化-出版物发行机构数和网点数-文化教育广电邮政系统数	处		2413	2310	2310	2290	2290	3167	6102	5917	6102
330000	浙江	1	120.153	30.2674	文化	文化教育广电邮政系统数	文化-出版物发行机构数和网点数-文化教育广电邮政系统数	处		2242	2614	2607	2208	2551	2481	2201	2201	2201
460000	海南	0	110.349	20.0174	文化	文化教育广电邮政系统数	文化-出版物发行机构数和网点数-文化教育广电邮政系统数	处		367	362	371	373	373	426	426	388	326
420000	湖北	1	114.342	30.5465	文化	文化教育广电邮政系统数	文化-出版物发行机构数和网点数-文化教育广电邮政系统数	处		664	664	664	600	600	600	480	328	263
430000	湖南	1	112.984	28.1124	文化	文化教育广电邮政系统数	文化-出版物发行机构数和网点数-文化教育广电邮政系统数	处		5010	5003	4682	4580	4588	4742	4687	4570	4421
620000	甘肃	0	103.826	36.0594	文化	文化教育广电邮政系统数	文化-出版物发行机构数和网点数-文化教育广电邮政系统数	处		82	80	82	82	82	82	82	81	1672
350000	福建	0	119.295	26.1008	文化	文化教育广电邮政系统数	文化-出版物发行机构数和网点数-文化教育广电邮政系统数	处		1316	1301	1083	1126	1170	1168	1183	1183	711
540000	西藏	0	91.1172	29.6469	文化	文化教育广电邮政系统数	文化-出版物发行机构数和网点数-文化教育广电邮政系统数	处		8	8	8	8	12	12	12	1	1
520000	贵州	1	106.707	26.5982	文化	文化教育广电邮政系统数	文化-出版物发行机构数和网点数-文化教育广电邮政系统数	处		736	672	839	875	875	869	835	833	772
210000	辽宁	0	123.429	41.8354	文化	文化教育广电邮政系统数	文化-出版物发行机构数和网点数-文化教育广电邮政系统数	处		526	487	487	483	481	1003	1003	356	52
500000	重庆	1	106.552	29.563	文化	文化教育广电邮政系统数	文化-出版物发行机构数和网点数-文化教育广电邮政系统数	处		620	620	601	897	852	612	607	601	1643
610000	陕西	0	108.954	34.2655	文化	文化教育广电邮政系统数	文化-出版物发行机构数和网点数-文化教育广电邮政系统数	处		1597	1597	1600	1597	1595	1577	1577	1577	1423
630000	青海	0	101.78	36.6209	文化	文化教育广电邮政系统数	文化-出版物发行机构数和网点数-文化教育广电邮政系统数	处		185	93	183	189	189	189	189	189	189
230000	黑龙江	0	126.662	45.7423	文化	文化教育广电邮政系统数	文化-出版物发行机构数和网点数-文化教育广电邮政系统数	处		10	582	582	388	377	350	469	363	336
