# Supplementary material for: Exploring the Influence Mechanisms of New Quality Productive Forces on the High-Quality Development of the Sports Industry
Source: Research Square preprint supplement (doi:10.21203/rs.3.rs-8254915/v1), 2026-01-20
Supplement: Supplementary file 2 [file aaeb3409dad74a46f43a4a67.xlsx]

## Sheet: 全国
2021年全国体育产业状况							2023年全国体育产业状况						2018年全国体育产业状况						2020年全国体育产业状况							2019年全国体育产业状况						2022年全国体育产业状况							2017年全国体育产业状况						2016年国家体育产业总产出和增加值
分类名称	总产出		增加值				分类名称	总产出		增加值			分类名称	总量（亿元）		结构（%）			体育产业类别名称	总产出		增加值				分类名称	总量（亿元）		结构（%）			分类名称	总产出		增加值				体育产业类别名称	总量（亿元）		结构（%）			体育产业类别名称	总量（亿元）		结构（%）
	总量	构成	总量	构成	增速			总量	构成	总量	构成			总产出	增加值	总产出	增加值			总量	构成	总量	构成	增速			总产出	增加值	总产出	增加值			总量	构成	总量	构成	增速			总产出	增加值	总产出	增加值			总产出	增加值	总产出	增加值
	(亿元)	(%)	(亿元)	(%)	(%)			(亿元)	(%)	(亿元)	(%)		体育产业	26579	10078	100	100			(亿元)	(%)	(亿元)	(%)	(%)		体育产业	29483.4	11248.1	100	100			(亿元)	(%)	(亿元)	(%)	(%)		体育产业	21987.7	7811.4	100	100		国家体育产业	19011.3	6474.8	100	100
体育产业	31175	100	12245	100	14.1		体育产业	36741	100	14915	100		体育服务业	12732	6530	47.9	64.8		体育产业	27372	100	10735	100	-4.6		体育服务业	14929.5	7615.1	50.6	67.7		体育产业	33008	100	13092	100	6.9		体育管理活动	504.9	262.6	2.3	3.4		体育管理活动	287.1	143.8	1.5	2.2
体育服务业	16591	53.2	8576	70	16.3		体育服务业	21046	57.3	10849	72.7		体育管理活动	747	390	2.8	3.9		体育服务业	14136	51.6	7374	68.7	-3.2		体育管理活动	866.1	451.9	2.9	4		体育服务业	17779	53.9	9180	70.1	7		体育竞赛表演活动	231.4	91.2	1.1	1.2		体育竞赛表演活动	176.8	65.5	0.9	1
体育管理活动	975	3.1	515	4.2	12.2		体育管理活动	1454	4	689	4.6		体育竞赛表演活动	292	103	1.1	1		体育管理活动	880	3.2	459	4.3	1.5		体育竞赛表演活动	308.5	122.3	1	1.1		体育管理活动	1143	3.5	599	4.6	16.3		体育健身休闲活动	581.3	254.9	2.6	3.3		体育健身休闲活动	368.6	172.9	1.9	2.7
体育竞赛表演活动	343	1.1	129	1.1	26.1		体育竞赛表演活动	752	2	300	2		体育健身休闲活动	1028	477	3.9	4.7		体育竞赛表演活动	273	1	103	1	-15.6		体育健身休闲活动	1796.6	831.9	6.1	7.4		体育竞赛表演活动	388	1.2	145	1.1	11.7		体育场馆服务	1338.5	678.2	6.1	8.7		体育场馆服务	1072.1	567.6	5.6	8.8
体育健身休闲活动	1877	6	892	7.3	21.1		体育健身休闲活动	2760	7.5	1378	9.2		体育场地和设施管理	2632	855	9.9	8.5		体育健身休闲活动	1580	5.8	736	6.9	-11.5		体育场地和设施管理	2748.9	1012.2	9.3	9		体育健身休闲活动	1921	5.8	962	7.3	7.8		体育中介服务	81	24.6	0.4	0.3		体育中介服务	63.2	17.8	0.3	0.3
体育场地和设施管理	2833	9.1	1031	8.4	27.7		体育场地和设施管理	3381	9.2	1289	8.6		体育经纪与代理、广告与会展、表演与设计服务	317	106	1.2	1.1		体育场地和设施管理	2149	7.9	808	7.5	-20.2		体育经纪与代理、广告与会展、表演与设计服务	392.9	117.8	1.3	1		体育场地和设施管理	3046	9.2	1106	8.4	7.2		体育培训与教育	341.2	266.5	1.6	3.4		体育培训与教育	296.2	230.6	1.6	3.6
体育经纪与代理、广告与会展、表演与设计服务	378	1.2	119	1	21.9		体育经纪与代理、广告与会展、表演与设计服务	676	1.8	239	1.6		体育教育与培训	1722	1425	6.5	14.1		体育经纪与代理、广告与会展、表演与设计服务	316	1.2	98	0.9	-16.9		体育教育与培训	1909.4	1524.9	6.5	13.6		体育经纪与代理、广告	370	1.1	113	0.9	-4.9		体育传媒与信息服务	143.7	57.7	0.7	0.7		体育传媒与信息服务	110.4	44.1	0.6	0.7
体育教育与培训	2272	7.3	1795	14.7	11.4		体育教育与培训	2851	7.8	2278	15.3		体育传媒与信息服务	500	230	1.9	2.3		体育教育与培训	2023	7.4	1612	15	5.7		体育传媒与信息服务	705.6	285.1	2.4	2.5		与会展、表演与设计服务							其他与体育相关服务	501.6	197.2	2.3	2.5		其他与体育相关服务	433	179.7	2.3	2.8
体育传媒与信息服务	1045	3.4	406	3.3	19.9		体育传媒与信息服务	1359	3.7	502	3.4		体育用品及相关产品销售、出租与贸易代理	4116	2327	15.5	23.1		体育传媒与信息服务	847	3.1	339	3.2	18.9		体育用品及相关产品销售、出租与贸易代理	4501.2	2562	15.3	22.8		体育教育与培训	2338	7.1	1888	14.4	5.2		体育用品及相关产品制造	13509.2	3264.6	61.4	41.8		体育用品及相关产品制造	11962.1	2863.9	62.9	44.2
体育用品及相关产品销售、出租与贸易代理	5145	16.5	2955	24.1	14.8		体育用品及相关产品销售、出租与贸易代理	5429	14.8	3159	21.2		其他体育服务	1377	616	5.2	6.1		体育用品及相关产品销售、出租与贸易代理	4514	16.5	2574	24	0.5		其他体育服务	1700.2	707	5.8	6.3		体育传媒与信息服务	1329	4	452	3.5	11.3		体育用品及相关产品销售、贸易代理与出租	4295.2	2615.8	19.5	33.5		体育用品及相关产品销售、贸易代理与出租	4019.6	2138.7	21.1	33
其他体育服务	1725	5.5	733	6	13.5		其他体育服务	2384	6.5	1015	6.8		体育用品及相关产品制造	13201	3399	49.7	33.7		其他体育服务	1554	5.7	645	6	-8.8		体育用品及相关产品制造	13614.1	3421	46.2	30.4		体育用品及相关产品销	5397	16.4	3119	23.8	5.6		体育场地设施建设	459.6	97.8	2.1	1.3		体育场地设施建设	222.1	50.3	1.2	0.8
体育用品及相关产品制造	13572	43.5	3433	28	9.2		体育用品及相关产品制造	14696	40	3832	25.7		体育场地设施建设	646	150	2.4	1.5		体育用品及相关产品制造	12287	44.9	3144	29.3	-8.1		体育场地设施建设	939.8	211.9	3.2	1.9		售、出租与贸易代理							注：若数据分项合计与总值不等，是由于数值修约误差所致。						注：若总量与分量合计尾数不等，是因数值修约误差所致，未做机械调整。
体育场地设施建设	1012	3.2	236	1.9	8.7		体育场地设施建设	999	2.7	234	1.6		注：若数据分项合计与总值不等，是由于数值修约误差所致。						体育场地设施建设	948	3.5	217	2	2.4		注：若数据分项合计与总值不等，是由于数值修约误差所致。						其他体育服务	1847	5.6	796	6.1	8.7
																																体育用品及相关产品制造	14259	43.2	3686	28.2	7.3
																																体育场地设施建设	970	2.9	226	1.7	-4.3
																																注：
																																1.增速为现价增长速度，未扣除价格因素。
																																2.若数据分项合计与总计不等，是由于数值修约误差所致。

## Sheet: 四川省
2018年——2024年四川省体育产业状况
分类名称	总量(亿元)														构成（%）
	总产出							增加值							总产出							增加值
	2018年	2019年	2020年	2021年	2022年	2023年	2024年	2018年	2019年	2020年	2021年	2022年	2023年	2024年	2018年	2019年	2020年	2021年	2022年	2023年	2024年	2018年	2019年	2020年	2021年	2022年	2023年	2024年
体育产业	1410.62	1582.68	1734.02	1993.39	2170.8	2304.6	2547.1	530.34	602.61	648.02	735.05	792.7	922.5	1020.8	100	100	100	100	100	100	100	100	100	100	100	100	100	100
体育服务业	936.81	1076.58	1170.31	1286.25	1395	1575.8	1742.9	419.22	472.24	511.02	562.67	603.2	739.6	821.7	66.4	68	67.5	64.5	64.3	68.4	68.4	79	78.3	78.9	76.5	76.1	80.2	80.5
体育管理活动	39.72	41.13	45.79	49.2	49.7	87.7	93.7	24.85	25.71	26.47	29.01	30.2	39.2	45.1	2.8	2.6	2.7	2.5	2.3	3.8	3.7	4.7	4.2	4.1	4	3.8	4.3	4.4
体育竞赛表演活动	7.45	12.12	13.4	14.55	16.6	30.9	37.6	2.86	3.42	3.52	3.87	4	15.4	18.2	0.5	0.8	0.8	0.7	0.8	1.3	1.5	0.5	0.6	0.5	0.5	0.5	1.7	1.8
体育健身休闲活动	103.34	119.17	148.83	162.64	178.1	141	164.9	50.87	62.19	77.31	87.65	96.9	79.7	88.1	7.3	7.5	8.6	8.1	8.2	6.1	6.5	9.6	10.3	11.9	11.9	12.2	8.6	8.6
体育场地和设施管理	34.18	37.32	38.06	48.34	52	44.7	45.8	17.86	18.69	18.97	22.24	23.4	17.3	18.4	2.4	2.3	2.2	2.4	2.4	1.9	1.8	3.4	3.1	2.9	3	3	1.9	1.8
体育经纪与代理、广告与会展、表演与设计服务	48.72	50.54	61.1	67.9	78.7	181.3	211.8	17.08	18.79	21.6	22.35	24.5	59.6	67.3	3.5	3.2	3.5	3.4	3.6	7.9	8.3	3.2	3.1	3.4	3	3.1	6.5	6.6
体育教育与培训	104.68	119.81	137.71	140.97	161.6	185.1	186.8	64.82	72.26	79.77	87.14	90.8	127.9	135.4	7.4	7.6	7.9	7.1	7.4	8	7.3	12.2	12	12.3	11.9	11.5	13.9	13.3
体育传媒与信息服务	110.72	135.74	153.01	172.79	203.9	282.7	289.5	57.47	68.6	76.19	81.14	89.9	104.7	120.4	7.9	8.6	8.8	8.7	9.4	12.3	11.4	10.8	11.4	11.8	11	11.3	11.3	11.8
体育用品及相关产品销售、出租与贸易代理	166.09	221.07	231.82	261.02	267.9	208.2	232.2	87.97	97.96	100.3	107.08	109.6	121.3	136.5	11.8	13.9	13.4	13.1	12.3	9	9.1	16.6	16.2	15.5	14.6	13.8	13.2	13.4
其他体育服务	321.91	339.68	340.59	368.84	386.6	414.2	480.6	95.44	104.62	106.89	122.19	134	174.5	192.3	22.8	21.5	19.6	18.5	17.8	18	18.9	18	17.4	16.5	16.6	16.9	18.9	18.8
体育用品及相关产品制造	313.24	333.84	357.52	452.08	504	541.7	605	74.21	90.15	94.17	120.37	136.3	142.2	152.5	22.2	21.1	20.6	22.7	23.2	23.5	23.8	14	15	14.5	16.4	17.2	15.4	14.9
体育场地设施建设	160.57	172.26	206.19	255.06	271.8	187.1	199.2	36.91	40.22	42.83	52.01	53.1	40.6	46.6	11.4	10.9	11.9	12.8	12.5	8.1	7.8	7	6.7	6.6	7.1	6.7	4.4	4.6

## Sheet: 浙江省
2015-2023年浙江省体育产业总产出和增加值
（按体育产业统计分类）																																						2014年全省及各市体育产业增加值情况
体育产业类别名称	总量（亿元）																		结构（%）
	总产出									增加值									总产出									增加值											体育产业增加值（亿元）	占GDP比重（%）
	2015年	2016年	2017年	2018年	2019年	2020年	2021年	2022年	2023年	2015年	2016年	2017年	2018年	2019年	2020年	2021年	2022年	2023年	2015年	2016年	2017年	2018年	2019年	2020年	2021年	2022年	2023年	2015年	2016年	2017年	2018年	2019年	2020年	2021年	2022年	2023年
全省体育产业合计	1507.83	1682.73	1842.73	2303.63	2614.76	2775.77	4271.99	4648.28	5120.06	463.35	525.56	593.08	751.96	845.45	880.58	1362.04	1444.11	1558.8	100	100	100	100	100	100	100	100	100	100	100	100	100	100	100	100	100	100		全省	354.82	0.883
体育管理活动	16.86	19.24	21.77	46.45	51.52	52.5	47.2	48.77	40.89	9.64	11.19	12.87	19.68	21.78	22.28	23.03	23.4	23.5	1.1	1.1	1.2	2	2	1.9	1.1	1	0.8	2.1	2.1	2.2	2.6	2.6	2.5	1.7	1.6	1.5		杭州	84.8	0.921
体育竞赛表演活动	8.93	10.29	13.16	19.96	27.48	25.2	5.94	8.29	13.66	4.18	4.93	6.24	10.78	15.07	14.87	2.97	3.8	4.4	0.6	0.6	0.7	0.9	1.1	0.9	0.1	0.2	0.3	0.9	0.9	1.1	1.4	1.8	1.7	0.2	0.3	0.3		宁波	60.96	0.801
体育健身休闲活动	80.67	93.32	119.79	120.52	161.54	147.11	117.45	153.52	152.85	40.55	47.86	61.26	73.94	98.5	96.25	80.71	97.12	112.45	5.4	5.5	6.5	5.2	6.2	5.3	2.7	3.3	3	8.8	9.1	10.3	9.8	11.7	10.9	5.9	6.7	7.2		温州	43.91	1.02
体育场地和设施管理	44.24	49.94	65.57	49.82	62.68	60.46	29.45	37.78	37.02	27.96	32.34	42.28	24.38	31.19	30.78	14.3	17.14	19.82	2.9	3	3.6	2.2	2.4	2.2	0.7	0.8	0.7	6	6.2	7.1	3.2	3.7	3.5	1.1	1.2	1.3		嘉兴	30.47	0.909
体育经纪与代理、广告与会展、表演与设计服务	7.24	7.82	9.17	96.34	118.24	126.31	153.3	176.4	231.83	1.71	2	2.28	22.99	25.75	27.05	49.94	57.66	60.43	0.5	0.5	0.5	4.2	4.5	4.6	3.6	3.8	4.5	0.4	0.4	0.4	3.1	3	3.1	3.7	4	3.9		湖州	17.41	0.89
体育培训与教育	15.81	17.89	20.22	91.32	106.83	116.97	114.03	122.43	156.19	9.71	11.27	12.86	71.14	78.24	85.82	83.7	89.91	92.3	1	1.1	1.1	4	4.1	4.2	2.7	2.6	3.1	2.1	2.1	2.2	9.5	9.3	9.7	6.1	6.2	5.9		绍兴	28.62	0.671
体育传媒与信息服务	75.05	108.49	177.95	119.23	167.86	210.06	178.67	173.86	195.4	17.71	24.36	41.55	37.29	45.97	55.37	77.99	76.22	104.17	5	6.4	9.7	5.2	6.4	7.6	4.2	3.7	3.8	3.8	4.6	7	5	5.4	6.3	5.7	5.3	6.7		金华	32.4	1.01
其他体育服务	55.1	67.68	74.66	89.81	86.02	87.04	204.54	214.96	236.19	27.28	32.48	33.33	27.02	26.89	27.09	88.01	86.94	93.23	3.7	4	4.1	3.9	3.3	3.1	4.8	4.6	4.6	5.9	6.2	5.6	3.6	3.2	3.1	6.5	6	6		衢州	7.43	0.666
体育用品及相关产品制造	1004.37	1064.48	1074.02	1364.02	1493.78	1590.34	2806.33	2978.48	3264.77	228.04	248.68	260.96	330.98	353.5	365.55	678.03	693	731.69	66.6	63.3	58.3	59.2	57.1	57.3	65.7	64.1	63.8	49.2	47.3	44	44	41.8	41.5	49.8	48	46.9		舟山	7.63	0.752
体育用品及相关产品销售、出租与贸易代理	182.57	215.14	234.51	242.41	270.9	281.75	529.92	604.15	653.44	93.24	105	113.42	122.03	136.34	141.43	246.68	273.91	290.6	12.1	12.8	12.7	10.5	10.4	10.2	12.4	13	12.8	20.1	20	19.1	16.2	16.1	16.1	18.1	19	18.6		台州	29.99	0.885
体育场地设施建设	16.98	28.42	31.92	63.75	67.92	78.03	85.16	129.65	137.81	3.33	5.44	6.03	11.73	12.22	14.09	16.67	25.02	26.21	1.1	1.7	1.7	2.8	2.6	2.8	2	2.8	2.7	0.7	1	1	1.6	1.4	1.6	1.2	1.7	1.7		丽水	7.38	0.701

## Sheet: 吉林省
													附件：2020年河南省体育产业总产出和增加值
													体育产业类别名称	总量(亿元)		结构(%)
														总产出	增加值	总产出	增加值
													河南体育产业	1285.81	514.26	100	100
													体育管理活动	22.25	11.42	1.7	2.2
													体育竞赛表演活动	27.34	14.96	2.1	2.9
													体育健身休闲活动	89.53	50.45	7	9.8
													体育场地和设施管理	67.52	39.29	5.3	7.6
													体育经纪与代理、广告与会展、表演与设计服 务	9.18	3.68	0.7	0.7
													体育教育与培训	88.11	64.17	6.9	12.5
													体育传媒与信息服务	3.72	1.27	0.3	0.2
													其他体育服务	81.56	41.9	6.3	8.1
													体育用品及相关产品制造	737.61	186.55	57.4	36.3
													体育用品及相关产品销售、出租与贸易代理	131.81	93.44	10.3	18.2
													体育场地设施建设	27.2	7.12	2.1	1.4

## Sheet: 山西
2015-2023年山西省体育产业总产出和增加值
（按体育产业统计分类）
体育产业类别名称	总量（亿元）																		结构（%）
	总产出									增加值									总产出									增加值
	2015年	2016年	2017年	2018年	2019年	2020年	2021年	2022年	2023年	2015年	2016年	2017年	2018年	2019年	2020年	2021年	2022年	2023年	2015年	2016年	2017年	2018年	2019年	2020年	2021年	2022年	2023年	2015年	2016年	2017年	2018年	2019年	2020年	2021年	2022年	2023年
全省体育产业合计	134.592			280.8			410.5		突破500	58.521			122.9			168.3			100									100
体育服务业							199.4									109.8
体育管理活动	10.0692									5.04261									7.5									8.6
体育竞赛表演活动	1.794									0.6312									1.3									1.1
体育健身休闲活动	3.5997									1.6822									2.7									2.9
体育场地和设施管理	13.6892									7.33427									10.2									12.5
体育经纪与代理、广告与会展、表演与设计服务	0.50003									0.14995									0.4									0.2
体育培训与教育	6.09385									4.78356									4.5									8.2
体育传媒与信息服务	1.5346									0.62612									1.1									1.1
其他体育服务	8.679									3.9316									6.4									6.7
体育用品及相关产品制造	33.944									11.1532									25.2									19
体育用品及相关产品销售、出租与贸易代理	45.8512									21.1626									34.1									36.2
体育场地设施建设	8.83707									2.02369									6.6									3.5

## Sheet: 江苏
江苏省2018—2024年体育产业总规模与增长值
分类名称	总量(亿元)											构成（%）
	总产出											增加值											总产出							增加值
	2014年	2015年	2016年	2017年	2018年	2019年	2020年	2021年	2022年	2023年	2024年	2014年	2015年	2016年	2017年	2018年	2019年	2020年	2021年	2022年	2023年	2024年	2018年	2019年	2020年	2021年	2022年	2023年	2024年	2018年	2019年	2020年	2021年	2022年	2023年	2024年
体育产业	约700		3154.09	3585.64	4066.18	4620.42	4881.8	5652.78	5963.68	6415.49			818.96	1049.54	1219.58	1387.2	1570.94	1641.79	1915.14	2026.98	2206.48				100	100	100	100				100	100	100	100
体育服务业				1479.14		2466.11	2498.02	2899.35	3054.08	3421.34					712.17		1074.79	1102.69	1288.18	1361.33	1522.71			53.4	51.2	51.3	51.2	53.3			68.4	67.2	67.3	67.2	69
体育管理活动							146.5	149.43	167.17	160								68.19	69.58	77.28	77.48				3	2.6	2.8	2.5				4.2	3.6	3.8	3.5
体育竞赛表演活动							58.53	45.16	43.22	53.7								18.99	14.55	14.16	18.2				1.2	0.8	0.7	0.8				1.2	0.8	0.7	0.8
体育健身休闲活动							162.48	191.53	184.84	202.5								82.1	97.12	95.18	102.64				3.3	3.4	3.1	3.2				5	5.1	4.7	4.7
体育场地和设施管理							140.83	15868	158.36	180.5								70.14	79.23	79.11	92.38				2.9	2.8	2.7	2.8				4.3	4.1	3.9	4.2
体育经纪与代理、广告与 会展、表演与设计服务							117.16	146.86	155.74	174.3								43.32	54.67	56.98	63.5				2.4	2.6	2.6	2.7				2.6	2.9	2.8	2.9
体育教育与培训							375.91	458.73	481.86	499.6								181.49	222.49	234.04	242.17				7.7	8.1	8.1	7.8				11.1	11.6	11.5	11
体育传媒与信息服务							127.894	153.6	175.9	195								62.19	75	86.28	97.72				2.6	2.7	2.9	3				3.8	3.9	4.3	4.4
体育用品及相关产品销 售、出租与贸易代理							289.82	319.97	1338.05	415.3								106.96	118.42	583.68	166.03				5.9	5.7	22.4	6.5				6.5	6.2	28.8	7.5
其他体育服务							1078.89	1275.38	348.93	1540.4								469.32	557.11	134.62	662.6				22.1	22.6	5.9	24				28.6	29.1	6.6	30
体育用品及相关产品制造				2051.35		2059.97	2276.39	2628.93	2780.12	2858.1					494.69		474.39	515.12	598.97	636.67	653.26			44.6	46.6	46.5	46.6	44.6			30.2	31.4	31.3	31.4	29.6
体育场地设施建设						94.34	107.39	124.5	129.48	136							21.76	23.97	27.99	28.98	30.5			2	2.2	2.2	2.2	2.1			1.4	1.5	1.5	1.4	1.4

## Sheet: 广东省
2018年——2024年广东省体育产业状况																																		2016年广东省体育产业基本统计
分类名称			总量(亿元)																构成（%）
			总产出									增加值							总产出							增加值								全省体育产业总产出（总规模）	3570（亿元）
	2016年	2017年	2018年	2019年	2020年	2021年	2022年	2023年	2024年	2016年	2017年	2018年	2019年	2020年	2021年	2022年	2023年	2024年	2018年	2019年	2020年	2021年	2022年	2023年	2024年	2018年	2019年	2020年	2021年	2022年	2023年	2024年		较2015年同比增长	0.113
体育产业	3570	3998.03	4912	5403	5295.44	6258	6500	7300		1180	1321.86	1655	1884	1811.4	2081	2130	2300		100	100	100	100				100	100	100	100					占全国总量	0.1878
体育服务业						3319									1415							53.04							68					全国各省（区、市）排名	1
体育管理活动			41	45	49.5	52						21	23	24.3	25				0.8	0.8	0.93	0.83				1.3	1.2	1.34	1.2					增加值	1180（亿元）
体育竞赛表演活动			46	50	37.5	39						16	18	14.5	14				0.9	0.9	0.71	0.62				1	1	0.8	0.67					占同期全省国内生产总值比重	0.0146
体育健身休闲活动			174	201	241.2	289						79	95	103.5	129				3.5	3.7	4.55	4.62				4.8	5	5.71	6.2					较2015年同比增长	0.181
体育场地和设施管理			45	45	49.5	72						20	20	23	25				0.9	0.8	0.93	1.15				1.2	1.1	1.27	1.2
体育经纪与代理、广告与会展、表演与设计服务			40	43	38.7	45						13	14	13.6	13				0.8	0.8	0.73	0.72				0.8	0.7	0.75	0.62
体育教育与培训			180	198	217.8	261						142	162	177.2	198				3.7	3.7	4.11	4.17				8.6	8.6	9.78	9.51
体育传媒与信息服务			178	214	278.2	335						55	72	92.6	114				3.6	4	5.25	5.35				3.3	3.8	5.11	5.48
体育用品及相关产品销售、出租与贸易代理			123	1687	99.4	2115						53	784	39	852				2.5	31.2	1.88	33.8				3.2	41.6	2.15	40.94					年份	总规模(亿元) 3570 3998.03 4912 5403 5149.94	增幅	塔加值	增幅
其他体育服务			2423	142	2312.1	111						559	64	524.5	45				49.3	2.6	43.66	1.77				33.8	3.4	28.96	2.16					2016		11.26% 11.99% 22.86% 9.99% -4.68%	1180 1321.86 1655 1884 1743.2	18.03% 12.02% 25.20% 13.84% -7.47%
体育用品及相关产品制造			1467	2569	1720.74	2698						653	585	745.8	611				29.9	47.5	32.49	43.11				39.5	31.1	41.17	29.36					2017
体育场地设施建设			195	209	250.8	241						44	47	53.4	55				4	3.9	4.74	3.85				2.7	2.5	2.95	2.64					2018
																																		2019
																																		2020

## Sheet: 上海市
2015-2023年上海市体育产业总产出和增加值
（按体育产业统计分类）
体育产业类别名称	总量（亿元）																		结构（%）
	总产出									增加值									总产出									增加值
	2015年	2016年	2017年	2018年	2019年	2020年	2021年	2022年	2023年	2015年	2016年	2017年	2018年	2019年	2020年	2021年	2022年	2023年	2015年	2016年	2017年	2018年	2019年	2020年	2021年	2022年	2023年	2015年	2016年	2017年	2018年	2019年	2020年	2021年	2022年	2023年
全省体育产业合计	910.13	1045.87	1266.93	1496.11	1780.88	1621.62	1737.8	1862.58	2000	351.22	421.27	470.26	556.9	558.96	560.19	596.31	640.45		100	100	100	100	100	100	100	100		100	100	100	100	100	100	100	100
体育服务业								1539.19									577.18									82.6									90.2
体育管理活动	26.26	31.37	46.23	43.05	38.97	39.73	41.7	42.29		17.96	18.02	20.26	22.08	16.83	22.99	25.29	28.85		2.9	3	3.6	2.9	2.2	2.4	2.4	2.3		5.1	4.3	4.3	4	3	4.1	4.2	4.5
体育竞赛表演活动	23.35	35.71	56.93	65.71	44.67	48.47	28.99	25.71		14.95	23.68	32.96	46.7	31.87	29.7	15.27	13.38		2.6	3.4	4.5	4.4	2.5	3	1.7	1.4		4.3	5.6	7	8.4	5.7	5.3	2.6	2.1
体育健身休闲活动	40.38	45.66	54	69.02	145.62	123.44	173.62	149.48		25.84	30.27	31.27	2939	57.65	40.51	45.08	83.09		4.4	4.4	4.3	4.6	8.2	7.6	10	8		7.4	7.2	6.7	5.3	10.3	7.2	7.6	13
体育场地和设施管理	15.59	18.24	19.76	21.18	18.48	15.72	17.67	15.23		11.62	12.55	13.53	10.67	4.8	2.13	4.77	6.79		1.7	1.7	1.6	1.4	1	1	1	0.8		3.3	3	2.9	1.9	0.9	0.4	0.8	1.1
体育经纪与代理、广告与会展、表演与设计服务	6.81	8.82	11.93	7.15	36.18	39.99	47.85	76.58		1.42	1.87	2.49	2.95	5.27	4.97	9.16	11.63		0.8	0.8	0.9	0.5	2	2.5	2.8	4.1		0.4	0.4	0.5	0.5	0.9	0.9	1.5	1.8
体育培训与教育	12.49	17.26	19.96	27.54	21.55	26.69	27.06	29.18		10	12.58	13.96	17.55	10.53	8.25	9.64	10.07		1.4	1.7	1.6	1.8	1.2	1.6	1.6	1.6		2.8	3	3	3.2	1.9	1.5	1.6	1.6
体育传媒与信息服务	31.1	60.48	86.51	130.52	130.66	192.89	196.94	235.48		17.49	36.77	44.9	56.01	49.5	87.13	101.28	29.02		3.4	5.8	6.8	8.7	7.3	11.9	11.3	12.6		5	8.7	9.5	10.1	8.9	15.5	17	4.5
其他体育服务	41.81	59.89	72.76	180.84	299.97	183.14	758.15	129.1		6.75	10.52	14.64	20.88	29.85	27.43	295.22	32.35		4.6	5.7	5.7	12.1	16.8	11.3	43.6	6.9		1.9	2.5	3.1	3.7	5.3	4.9	49.5	5.1
体育用品及相关产品制造	346.06	350.47	412.45	351.81	336.25	304.84	101.56	296.39		71.25	72.16	79.77	6935	69.75	51.96	25.92	59.51		38	33.5	32.6	23.5	18.9	18.8	5.8	15.9		20.3	17.1	17	12.5	12.5	9.3	4.3	9.3
体育用品及相关产品销售、出租与贸易代理	350.77	397.93	461.37	589.75	678.56	622	319.61	836.14		170.06	197.84	210.22	279.7	279.17	280.79	59.03	362		38.5	38	36.4	39.4	38.1	38.4	18.4	44.9		48.4	47	44.7	50.2	49.9	50.1	9.9	56.5
体育场地设施建设	15.51	20.04	25.03	9.53	29.97	24.7	24.65	27		3.88	5.01	6.26	1.62	3.72	4.33	5.67	3.75		1.7	1.9	2	0.6	1.7	1.5	1.4	1.4		1.1	1.2	1.3	0.3	0.7	0.8	1	0.6

## Sheet: 山东
2015-2023年山东省体育产业总产出和增加值
（按体育产业统计分类）
体育产业类别名称	总量（亿元）																		结构（%）
	总产出									增加值									总产出									增加值
	2015年	2016年	2017年	2018年	2019年	2020年	2021年	2022年	2023年	2015年	2016年	2017年	2018年	2019年	2020年	2021年	2022年	2023年	2015年	2016年	2017年	2018年	2019年	2020年	2021年	2022年	2023年	2015年	2016年	2017年	2018年	2019年	2020年	2021年	2022年	2023年
全省体育产业合计	1980.79	2292.18	2348.01	2466.55	2771.15	2937.42	3712.69	4239.89		606.74	704.08	770.41	968.58	1078.45	1122.79	1395.78	1565.56		100	100	100	100	100	100	100	100		100	100	100	100	100	100	100	100
体育服务业				1481.52	1508.72	1491.63	1819.55	1903.73					713.98	790.47	779.32	955.52	990.42					60.1	54.44	50.7803	49.0089	1.1559					73.7	73.3	69.4092	68.4578	4.37273
体育管理活动	37.63	47.58	55.52	43.1	40.5	39.51	46.83	49.12		19.77	23.85	27.31	18.46	18.55	17.86	20.47	22.48		1.9	2.1	2.4	1.7	1.46	1.34506	1.26135	0.0297496		3.2	3.4	3.5	1.9	1.72	1.59068	1.46656	0.0936766
体育竞赛表演活动	23.14	44.18	98.83	8.82	10.73	10.07	13.43	13.22		12.59	26.3	62.43	4.37	4.89	4.43	5.84	5.33		1.2	1.9	4.2	0.4	0.39	0.342818	0.361732	0.00853164		2.1	3.7	8.1	0.5	0.45	0.394553	0.418404	0.0267255
体育健身休闲活动	37.48	43.46	75.69	115.44	145.59	132.21	155.22	158.46		20.62	24.25	40.33	61.73	68.97	61.07	82.35	83.02		1.9	1.9	3.2	4.7	5.25	4.50089	4.1808	0.0986062		3.4	3.4	5.2	6.4	6.4	5.43913	5.89993	0.376857
体育场地和设施管理	15.12	18.12	22.89	21.35	50.81	43.12	56.34	55.83		7.12	8.55	10.81	9.18	21.82	18.84	24.85	23.89		0.7	0.8	1	0.9	1.83	1.46795	1.5175	0.035791		1.2	1.2	1.4	0.9	2.02	1.67796	1.78037	0.113721
体育经纪与代理、广告与会展、表演与设计服务	282.07	367.51	457.63	282.71	77.95	57.77	61.82	62.82		95.88	125.4	156.22	94.97	30.72	21.72	23.69	25.91		14.2	16	19.5	11.5	2.81	1.96669	1.6651	0.0392722		15.8	17.8	20.3	9.8	2.85	1.93447	1.69726	0.108412
体育培训与教育	52.9	66.04	71.94	116.28	542.14	523.75	650.78	637.57		33.74	42.12	45.88	86.84	275.17	268.46	329.83	310.11		2.7	2.9	3.1	4.7	19.56	17.8303	17.5285	0.413419		5.6	6	6	9	25.52	23.9101	23.6305	1.5094
体育传媒与信息服务	21.13	27.21	34.15	36.99	31.55	38.37	50.07	61.84		8.68	11.09	13.94	13.94	14.29	17.04	22.22	27.76		1	1.2	1.5	1.5	1.14	1.30625	1.34862	0.0318078		1.4	1.6	1.8	1.4	1.33	1.51765	1.59194	0.101685
其他体育服务	166.91	206.43	243	610.57	226.17	213.34	260.82	275.22		70.77	87.23	101.96	239.37	113.18	105.13	134.82	141.61		8.4	9	10.3	24.8	8.16	7.26284	7.0251	0.165691		11.6	12.4	13.2	24.7	10.49	9.36328	9.65912	0.616975
体育用品及相关产品制造	1196.71	1310.78	1139.67	963.52	1223.67	1403.1	1842.53	2280.81		239.57	251.8	217.31	249.46	280.26	334.92	430.37	562.15		60.4	57.2	48.5	39.1	44.16	47.7664	49.6279	1.1705		39.5	35.8	28.2	25.8	25.99	29.8293	30.8337	1.9695
体育用品及相关产品销售、出租与贸易代理	142.48	154.13	140.07	246.26	383.29	433.49	524.24	589.65		94.61	99.16	88.66	185.12	242.88	264.75	311.45	350.31		7.2	6.7	6	10	13.83	14.7575	14.1202	0.333033		15.6	14.1	11.5	19.1	22.52	23.5797	22.3137	1.42528
体育场地设施建设	5.24	6.73	8.61	21.51	38.76	42.69	50.61	55.35		3.41	4.35	5.55	5.14	7.72	8.55	9.9	12.99		0.3	0.3	0.4	0.9	1.4	1.45332	1.36316	0.0321509		0.6	0.6	0.7	0.5	0.72	0.761496	0.709281	0.0453052

## Sheet: 河南
2015-2023年河南省体育产业总产出和增加值
（按体育产业统计分类）
体育产业类别名称	总量（亿元）																		结构（%）
	总产出									增加值									总产出									增加值
	2015年	2016年	2017年	2018年	2019年	2020年	2021年	2022年	2023年	2015年	2016年	2017年	2018年	2019年	2020年	2021年	2022年	2023年	2015年	2016年	2017年	2018年	2019年	2020年	2021年	2022年	2023年	2015年	2016年	2017年	2018年	2019年	2020年	2021年	2022年	2023年
全省体育产业合计					1232.43	1285.81	1448.79	1565.75						492.47	514.26	574.96	617.08							100	100	100							100	100	100
体育管理活动						22.25	25.8	28.31							11.42	13.09	14.32							1.7	1.8	1.8							2.2	2.3	2.3
体育竞赛表演活动						27.34	34.77	44.45							14.96	18.86	23.77							2.1	2.4	2.8							2.9	3.3	3.9
体育健身休闲活动						89.53	117.44	134.77							50.45	68.26	77							7	8.1	8.6							9.8	11.9	12.5
体育场地和设施管理						67.52	75.59	85.09							39.29	45.81	49.95							5.3	5.2	5.4							7.6	8	8.1
体育经纪与代理、广告与会展、表演与设计服务						9.18	11.31	13.21							3.68	4.37	5.1							0.7	0.8	0.8							0.7	0.8	0.8
体育培训与教育						88.11	100.98	112.65						71.93	64.17	72.68	81.07							6.9	7	7.2							12.5	12.6	13.1
体育传媒与信息服务						3.72	4.5	4.87							1.27	1.62	1.75							0.3	0.3	0.3							0.2	0.3	0.3
其他体育服务						81.56	100.8	109.89							41.9	49.73	53.72							6.3	7	7							8.1	8.6	8.7
体育用品及相关产品制造						737.61	795.08	840.24						160.73	186.55	190.49	196.59							57.4	54.9	53.7							36.3	33.1	31.9
体育用品及相关产品销售、出租与贸易代理						131.81	152.34	158.76						88.1	93.44	102.33	105.22							10.3	10.5	10.1							18.2	17.8	17.1
体育场地设施建设						27.2	30.18	33.52						5.68	7.12	7.72	8.59							2.1	2.1	2.1							1.4	1.3	1.4

[truncated: 14 more sheets: 广西, 重庆市, 重庆市 (2), 河北, 湖南省, 贵州, 天津, 辽宁省, 湖北省, 江西省, 福建, 陕西, 安徽, 内蒙古自治区]
